# Supplementary material
Source: ML conference proceedings conference paper supplement (https://www.ecva.net/papers/eccv_2020/papers_ECCV/html/123550171_ECCV_2020_paper.php)
Supplement: Supplementary file 1 [file 123550171-supp.zip]

# Weighing Counts: Sequential Crowd Counting by Reinforcement Learning Supplement Materials

Liang Liu<sup>1</sup>, Hao Lu<sup>2</sup>, Hongwei Zou<sup>1</sup>, Haipeng Xiong<sup>1</sup>,  
Zhiguo Cao<sup>1</sup>, and Chunhua Shen<sup>2</sup>

<sup>1</sup> School of Artificial Intelligence & Automation, Huazhong University of Science and  
Technology, China

<sup>2</sup> The University of Adelaide, Australia  
{wings,zgcao}@hust.edu.cn

## 1 Discretization and Inverse-Quantization

In this section, we illustrate the generation of counting intervals (‘Discretization’) and inverse-quantization [2] in detail.

### 1.1 Counting Intervals Generation

First, given a map of dotted annotations, it is convoluted by the Gaussian kernel to compute the density map  $\mathcal{D}(p)$  [1], which takes the form

$$\mathcal{D}(p) = \sum_{i=1}^N \delta(p - D_i) * G_{\sigma_i}(p) \quad (1)$$

where  $p \in I$  is a pixel in the image  $I$ ,  $D_i$  is the  $i$ -th dot annotation of  $I$ , and  $G_{\sigma_i}$  is a Gaussian kernel with the variance of  $\sigma_i$ . In this paper, we employ the adaptive Gaussian kernel [4], whose variance is defined by

$$\sigma_i = \beta \bar{d}_i, \quad (2)$$

where  $\bar{d}_i$  is the average distance between the dot point  $D_i$  and its 3-nearest dot points,  $\beta$  is a hyperparameter which is set to 0.3 following [4].

Further, the density map is summed at patch-level to compute patch count  $\mathcal{N}$  [3]

$$\mathcal{N}_i = \sum_{p_b \in P_i} \mathcal{D}(p_b), \quad (3)$$

where  $P_i$  is the  $i$ -th patch of the image  $I$ .

Finally, the count value is quantized to compute the count interval  $\mathcal{C}$  [2]

$$\mathcal{C}_i = \mathcal{Q}(\mathcal{N}_i) = \begin{cases} 0 & \mathcal{N}_i = 0 \\ \max\left(\text{floor}\left(\frac{\log(\mathcal{N}_i) - l}{w} + 2\right), 1\right) & \text{Otherwise} \end{cases}, \quad (4)$$

where  $w$  is the width of the quantized interval in log space,  $l$  is a hyperparameter which means the interval of  $(0, e^l]$  is divided as an independent class [2]. In this paper, we set  $w = 0.1$  and  $l = -2$ .

## 1.2 Inverse-Quantization

During testing, the counting value is recovered from the counting interval by the inverse-quantization  $\mathcal{IQ}$  [2], i.e.,

$$\mathcal{N}_i = \mathcal{IQ}(\mathcal{C}_i) = \begin{cases} 0 & \mathcal{C}_i = 0 \\ \frac{1}{2}exp(l + w(\mathcal{C}_i - 1)) & \mathcal{C}_i = 1 \\ \frac{1}{2}exp(l + w(\mathcal{C}_i - 2)) + \frac{1}{2}exp(l + w(\mathcal{C}_i - 1)) & Otherwise \end{cases} \quad (5)$$

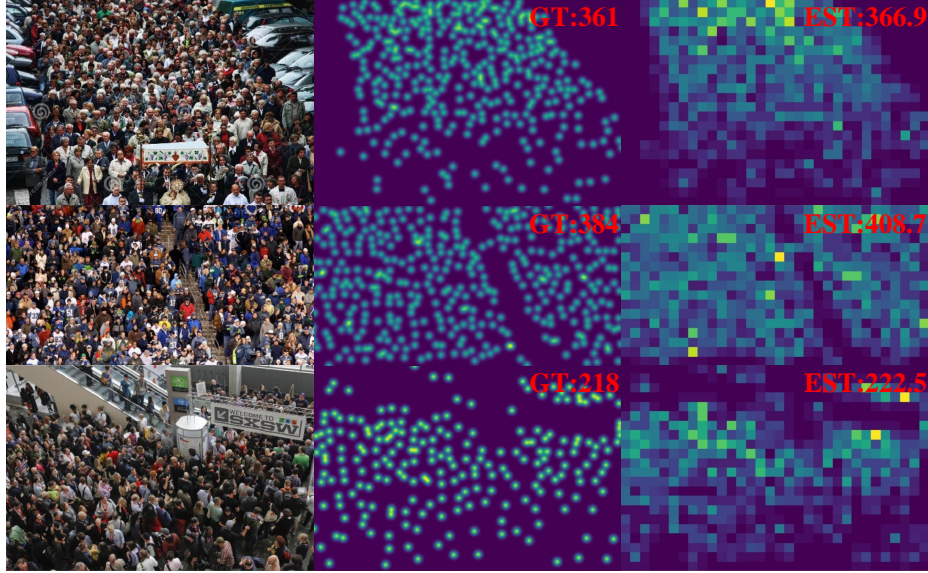

**Fig. I.** Qualitative results of LibraNet on the ShanghaiTech part\_A dataset. From left to right, there are testing images, density maps with ground-truth counts, and our estimated results.

## References

1. Lempitsky, V., Zisserman, A.: Learning to count objects in images. In: Advances in Neural Information Processing Systems (NIPS). pp. 1324–1332 (2010)
2. Liu, L., Lu, H., Xiong, H., Xian, K., Cao, Z., Shen, C.: Counting objects by blockwise classification. IEEE Transactions on Circuits and Systems for Video Technology (2019)
3. Lu, H., Cao, Z., Xiao, Y., Zhuang, B., Shen, C.: TasselNet: counting maize tassels in the wild via local counts regression network. Plant methods **13**(1), 79 (2017)
4. Zhang, Y., Zhou, D., Chen, S., Gao, S., Ma, Y.: Single-image crowd counting via multi-column convolutional neural network. In: Proc. IEEE Conference on Computer Vision and Pattern Recognition (CVPR). pp. 589–597 (2016)

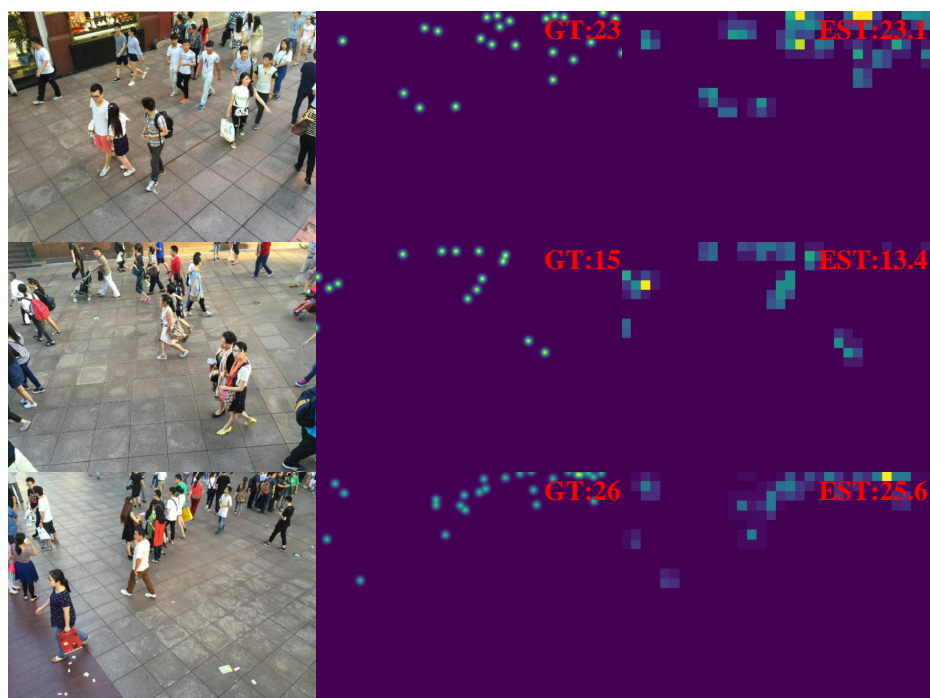

**Fig. II.** Qualitative results of LibraNet on the ShanghaiTech part\_B dataset. From left to right, there are testing images, density maps with ground-truth counts, and our estimated results.

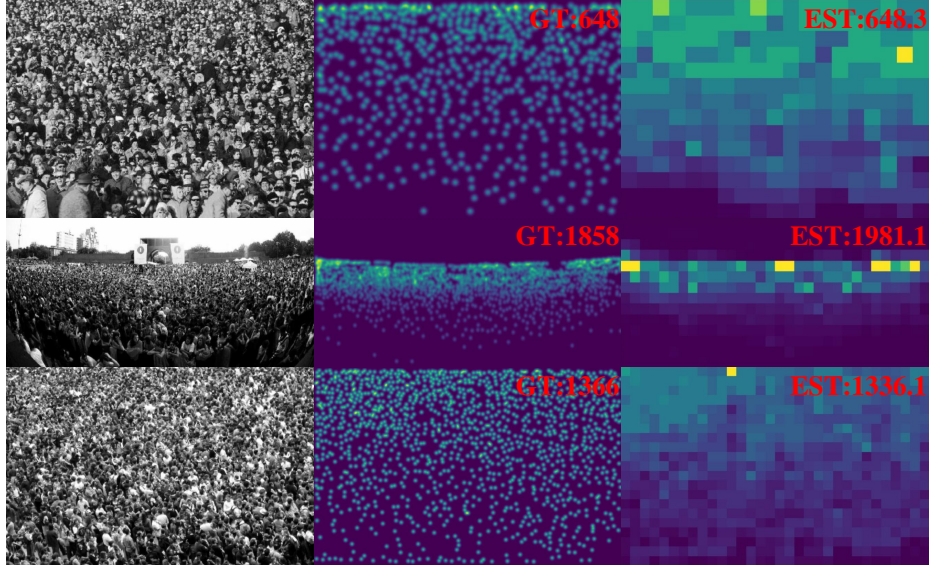

**Fig. III.** Qualitative results of LibraNet on the UCF\_CC\_50 dataset. From left to right, there are testing images, density maps with ground-truth counts, and our estimated results.

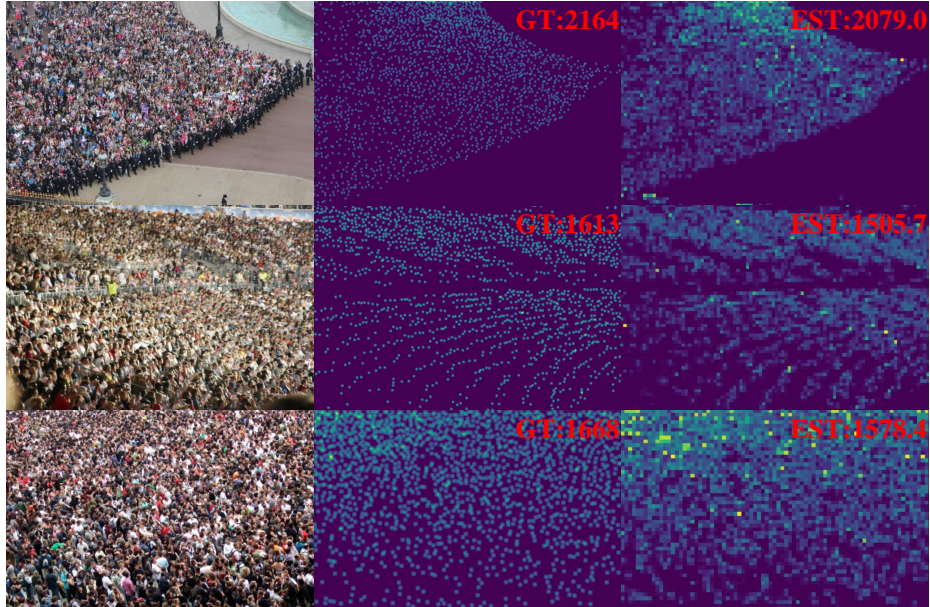

**Fig. IV.** Qualitative results of LibraNet on the UCF-QNRF dataset. From left to right, there are testing images, density maps with ground-truth counts, and our estimated results.



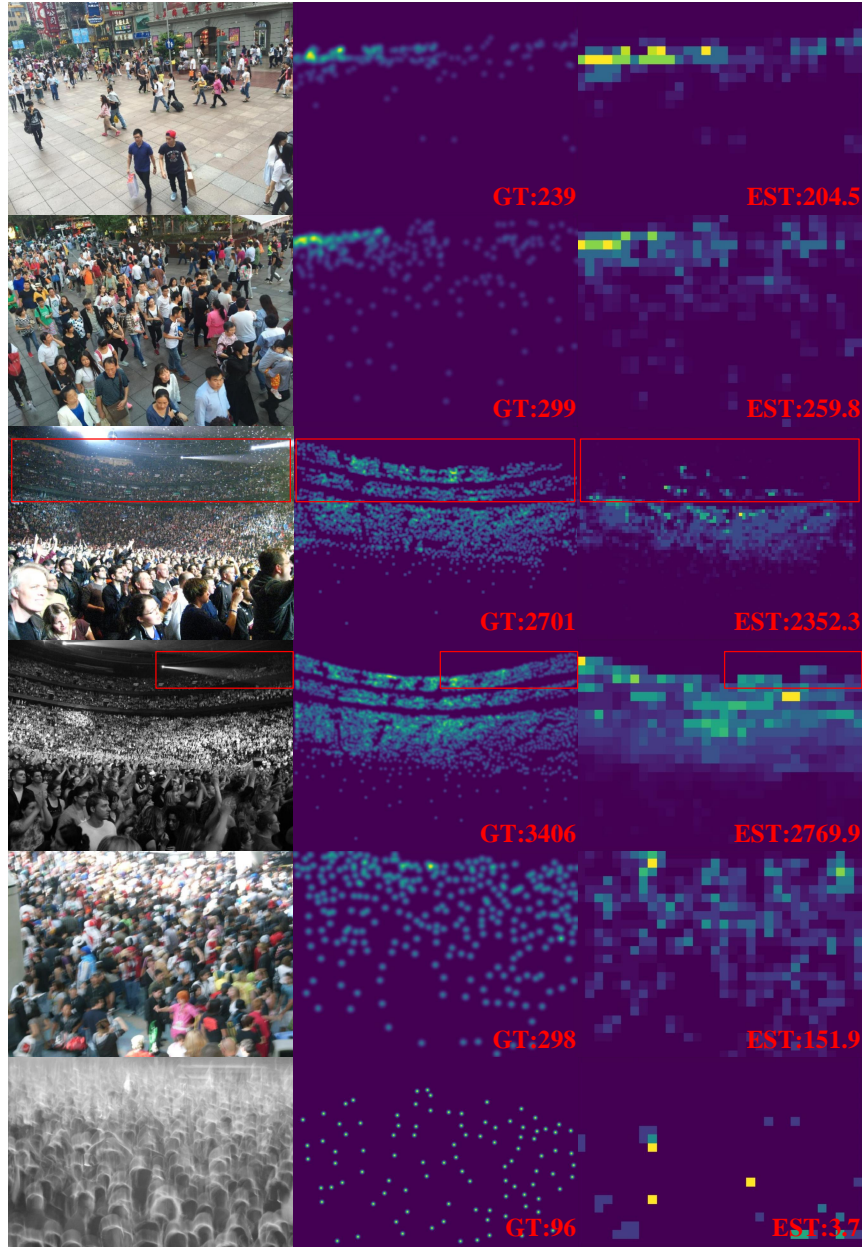

**Fig. V.** Failure cases. The first 2 cases from the ShanghaiTech Part\_B dataset show that our method suffers from the training bias caused by long-tailed distribution, leading to under-estimations. The 3-rd and 4-th rows demonstrate that LibraNet can be affected by illumination variations. The last 2 rows illustrate that our method fails due to blurry appearance. In each row, from left to right, there are testing images, density maps with ground-truth counts, and our estimated results.
