# Supplementary material
Source: ML conference proceedings conference paper supplement (https://www.ecva.net/papers/eccv_2020/papers_ECCV/html/123550171_ECCV_2020_paper.php)
Supplement: Supplementary file 7 [file 123550171-supp.zip]

Archive with 18 entries (17 files):
- 1022-supp.pdf
- imageS/
- 1022-supp.bbl
- 1022-supp.tex
- comment.sty
- cvpr_eso.sty
- egbib.bib
- eijkel2.eps
- eso-pic.sty
- imageS/50-N.pdf
- imageS/A-N.pdf
- imageS/B-N.pdf
- imageS/QNRF-N.pdf
- imageS/failurecase.pdf
- llncs.cls
- ruler.sty
- splncs.bst
- splncs04.bst
