# Supplementary material
Source: ML conference proceedings conference paper supplement (https://www.ecva.net/papers/eccv_2020/papers_ECCV/html/123550171_ECCV_2020_paper.php)
Supplement: Supplementary file 7 [file 123550171-supp.zip › 1022-supp.bbl]

\begin{thebibliography}{1}
\providecommand{\url}[1]{\texttt{#1}}
\providecommand{\urlprefix}{URL }
\providecommand{\doi}[1]{https://doi.org/#1}

\bibitem{lempitsky2010learning}
Lempitsky, V., Zisserman, A.: Learning to count objects in images. In: Advances
  in Neural Information Processing Systems (NIPS). pp. 1324--1332 (2010)

\bibitem{liu2019countingobject}
Liu, L., Lu, H., Xiong, H., Xian, K., Cao, Z., Shen, C.: Counting objects by
  blockwise classification. IEEE Transactions on Circuits and Systems for Video
  Technology  (2019)

\bibitem{lu2017tasselnet}
Lu, H., Cao, Z., Xiao, Y., Zhuang, B., Shen, C.: {TasselNet}: counting maize
  tassels in the wild via local counts regression network. Plant methods
  \textbf{13}(1), ~79 (2017)

\bibitem{zhang2016single}
Zhang, Y., Zhou, D., Chen, S., Gao, S., Ma, Y.: Single-image crowd counting via
  multi-column convolutional neural network. In: Proc. IEEE Conference on
  Computer Vision and Pattern Recognition (CVPR). pp. 589--597 (2016)

\end{thebibliography}
