# Supplementary material
Source: ML conference proceedings conference paper supplement (https://www.ecva.net/papers/eccv_2020/papers_ECCV/html/123550171_ECCV_2020_paper.php)
Supplement: Supplementary file 7 [file 123550171-supp.zip › 1022-supp.tex]

\documentclass[runningheads]{llncs}
\usepackage{graphicx}
\usepackage{comment}
\usepackage{amsmath,amssymb} 
\usepackage{color}
\usepackage{eucal}
\renewcommand{\thefigure}{\Roman{figure}}


\begin{document}
\pagestyle{headings}
\mainmatter
\def\ECCVSubNumber{1022} 

\title{Weighing Counts: Sequential Crowd Counting by Reinforcement Learning \\Supplement Materials}


\author{Liang Liu\inst{1} \and
	Hao Lu\inst{2} \and
	Hongwei Zou\inst{1}\and
	Haipeng Xiong\inst{1}\and\\
	Zhiguo Cao\inst{1}\and
	Chunhua Shen\inst{2}}
\institute{School of 
	Aritifical Intelligence \& Automation,
    Huazhong University of Science and Technology, China \and
	The University of Adelaide, Australia\\
	\email{\{wings,zgcao\}@hust.edu.cn}}
	\titlerunning{Weighing Counts: Sequential Crowd Counting by Reinforcement Learning}

\authorrunning{Liu et al.}


\maketitle
\section{Discretization and Inverse-Quantization  }
In this section, we illustrate the generation of counting intervals (`Discretization') and 
inverse-quantization~\cite{liu2019countingobject} in detail.

\subsection{Counting Intervals Generation}
First, given a map of dotted annotations, it is convoluted by the Gaussian kernel to compute the density map $\mathcal{D}\left(p \right) $~\cite{lempitsky2010learning}, which takes the form
\begin{equation}\label{equ:density map}
\mathcal{D}\left(p \right) = \sum_{i=1}^N \delta \left(p - D_i \right) \ast G_{\sigma_i} \left(p\right) 
\end{equation}
where $p \in I$ is a pixel in the image $I$, $D_i$ is the $i$-th dot annotation of $I$, and $G_{\sigma_i}$ is a Gaussian kernel with the variance of $\sigma_i$. In this paper, we employ the adaptive Gaussian kernel~\cite{zhang2016single}, whose variance is defined by
\begin{equation}\label{equ:adaptive}
\sigma_i  = \beta \bar{d}_i \,,
\end{equation}  
where $\bar{d}_i$ is the average distance between the dot point ${D_i}$ and its $3$-nearest dot points, $\beta$ is a hyperparameter which is set to $0.3$ following~\cite{zhang2016single}.

Further, the density map is summed at patch-level to compute patch count $\mathcal{N} $~\cite{lu2017tasselnet}
\begin{equation}\label{equ:count map}
\mathcal{N}_i  =\sum_{p_b \in P_i} \mathcal{D}\left( p_b\right) \,,
\end{equation}
where $P_i$ is the $i$-th patch of the image $I$. 

Finally, the count value is quantized to compute the count interval $\mathcal{C}$~\cite{liu2019countingobject}
\begin{equation}\label{equ:class map}
\mathcal{C}_i= {\mathcal{Q}}{ \left( {\mathcal{N}_i} \right) }
={ \left\{ {\begin{array}{*{20}{l}}
			{0}&{\mathcal{N}_i=0}\\
			{max{ \left( {floor{ \left( {\frac{{log{ \left( {\mathcal{N}_i} \right) }-l}}{{w}}+2} \right) },1} \right) }}&{Otherwise}
			\end{array}}\right., }
\end{equation}
where $w$ is the width of the quantized interval in log space, $l$ is a hyperparameter which means the interval of $\left(0, e^l\right]$ is divided as an independent class~\cite{liu2019countingobject}. In this paper, we set $w=0.1$ and $l=-2$.

\subsection{Inverse-Quantization}
During testing, the counting value is recovered from the counting interval by the inverse-quantization $\mathcal{IQ}$~\cite{liu2019countingobject}, i.e.,
\begin{equation}\label{equ:inver quantization }
{\mathcal{N}_i= {\mathcal{IQ}}{ \left( {\mathcal{C}_i} \right) }
={ \left\{ {\begin{array}{*{20}{l}}
{0}&{\mathcal{C}_i=0}\\
{\frac{{1}}{{2}}exp{ \left( {l+w{ \left( {\mathcal{C}_i-1} \right) }} \right) }}&{\mathcal{C}_i=1}\\
{\frac{{1}}{{2}}exp{ \left( {l+w{ \left( {\mathcal{C}_i-2} \right) }} \right) }+\frac{{1}}{{2}}exp{ \left( {l+w{ \left( {\mathcal{C}_i-1} \right) }} \right) }}&{Otherwise}
\end{array}}\right.}}
\end{equation}	


\begin{figure}[h]
	\centering
	\includegraphics[width=\linewidth]{imageS/A-N.pdf}\\
	\caption{ Qualitative results of LibraNet on the ShanghaiTech part\_A dataset. From left to right, there are testing images, density maps with ground-truth counts, and our estimated results.}
	\label{fig:A}
\end{figure}
	
\begin{figure}[!h]
	\centering
	\includegraphics[width=\linewidth]{imageS/B-N.pdf}\\
	\caption{ Qualitative results of LibraNet on the ShanghaiTech part\_B dataset. From left to right, there are testing images, density maps with ground-truth counts, and our estimated results.}
	\label{fig:B}
\end{figure}
	
\begin{figure*}[!t]
	\centering
	\includegraphics[width=\linewidth]{imageS/50-N.pdf}
	\caption{Qualitative results of LibraNet on the UCF\_CC\_50 dataset. From left to right, there are testing images, density maps with ground-truth counts, and our estimated results.}
	\label{fig:50}
\end{figure*}
	
\begin{figure*}[!t]
	\centering
	\includegraphics[width=\linewidth]{imageS/QNRF-N.pdf}
	\caption{Qualitative results of LibraNet on the UCF-QNRF dataset. From left to right, there are testing images, density maps with ground-truth counts, and our estimated results.}
	\label{fig:QNRF}
\end{figure*}


\begin{figure*}[!t]
	\centering
	\includegraphics[width=0.925\linewidth]{imageS/failurecase.pdf}
	\caption{Failure cases. The first $2$ cases from the ShanghaiTech Part\_B dataset show that our method suffers from the training bias caused by long-tailed distribution, leading to under-estimations. The $3$-rd and $4$-th rows demonstrate that LibraNet can be affected by illumination variations. The last $2$ rows illustrate that our method fails due to blurry appearance. In each row, from left to right, there are testing images, density maps with ground-truth counts, and our estimated results.}
	\label{fig:failurecase}
\end{figure*}


\bibliographystyle{splncs04}
\bibliography{egbib}
\end{document}
