# Supplementary material
Source: ML conference proceedings conference paper supplement (https://www.ecva.net/papers/eccv_2020/papers_ECCV/html/123550171_ECCV_2020_paper.php)
Supplement: Supplementary file 7 [file 123550171-supp.zip › egbib.bib]

@inproceedings{caicedo2015active,
	title={Active object localization with deep reinforcement learning},
	author={Caicedo, Juan C and Lazebnik, Svetlana},
    booktitle={Proc. IEEE Conference on Computer Vision and Pattern Recognition (CVPR)},
	pages={2488--2496},
	year={2015}
}
@inproceedings{yan2019perspective,
  title={Perspective-Guided Convolution Networks for Crowd Counting},
  author={Yan, Zhaoyi and Yuan, Yuchen and Zuo, Wangmeng and Tan, Xiao and Wang, Yezhen and Wen, Shilei and Ding, Errui},
booktitle = {Proc. IEEE/CVF International Conference on Computer Vision (ICCV)},
  pages={952--961},
  year={2019}
}
@inproceedings{sindagi2019multi,
  title={Multi-Level Bottom-Top and Top-Bottom Feature Fusion for Crowd Counting},
  author={Sindagi, Vishwanath A and Patel, Vishal M},
booktitle = {Proc. IEEE/CVF International Conference on Computer Vision (ICCV)},
  pages={1002--1012},
  year={2019}
}
@inproceedings{liuijcai2018crowd,
	title={Crowd counting using deep recurrent spatial-aware network},
	author={Liu, Lingbo and Wang, Hongjun and Li, Guanbin and Ouyang, Wanli and Lin, Liang},
	booktitle={Proc. International Joint Conference on Artificial Intelligence (IJCAI)},
	pages={849--855},
	year={2018},
	organization={AAAI Press}
}%%%%%%%%%
@inproceedings{jiang2019crowd,
  title={Crowd Counting and Density Estimation by Trellis Encoder-Decoder Networks},
  author={Jiang, Xiaolong and Xiao, Zehao and Zhang, Baochang and Zhen, Xiantong and Cao, Xianbin and Doermann, David and Shao, Ling},
  booktitle={Proc. IEEE/CVF Conference on Computer Vision and Pattern Recognition (CVPR)},
  pages={6133--6142},
  year={2019}
}
@inproceedings{liu2019context,
  title={Context-Aware Crowd Counting},
  author={Liu, Weizhe and Salzmann, Mathieu and Fua, Pascal},
  booktitle={Proc. IEEE/CVF Conference on Computer Vision and Pattern Recognition (CVPR)},
  pages={5099--5108},
  year={2019}
}
@InProceedings{Liu_2019_ICCV,
author = {Liu, Lingbo and Qiu, Zhilin and Li, Guanbin and Liu, Shufan and Ouyang, Wanli and Lin, Liang},
title = {Crowd Counting With Deep Structured Scale Integration Network},
booktitle = {Proc. IEEE/CVF International Conference on Computer Vision (ICCV)},
month = {October},
year = {2019}
}
@inproceedings{Idrees2013Multi,
	title={Multi-source Multi-scale Counting in Extremely Dense Crowd Images},
	author={Idrees, Haroon and Saleemi, Imran and Seibert, Cody and Shah, Mubarak},
	booktitle={Proc. IEEE Conference on Computer Vision and Pattern Recognition (CVPR)},
	pages={2547--2554},
	year={2013},
}
@inproceedings{lempitsky2010learning,
	title={Learning to count objects in images},
	author={Lempitsky, Victor and Zisserman, Andrew},
	booktitle={Advances in Neural Information Processing Systems (NIPS)},
	pages={1324--1332},
	year={2010}
}%%%%%%%%%
@inproceedings{lu2019indices,
  title={Indices matter: Learning to index for deep image matting},
  author={Lu, Hao and Dai, Yutong and Shen, Chunhua and Xu, Songcen},
  booktitle = {Proc. IEEE/CVF International Conference on Computer Vision (ICCV)},
  pages={3266--3275},
  year={2019}
}

@article{lu2020index,
  title={Index Networks},
  author={Lu, Hao and Dai, Yutong and Shen, Chunhua and Xu, Songcen},
  journal={IEEE Transactions on Pattern Analysis and Machine Intelligence},
  year={2020},
}
@inproceedings{krizhevsky2012imagenet,
  title={Imagenet classification with deep convolutional neural networks},
  author={Krizhevsky, Alex and Sutskever, Ilya and Hinton, Geoffrey E},
  booktitle={Advances in Neural Information Processing Systems (NIPS)},
  pages={1097--1105},
  year={2012}
}
@inproceedings{sindagi2017generating,
	title={Generating High-Quality Crowd Density Maps Using Contextual Pyramid CNNs},
	author={Sindagi, Vishwanath A and Patel, Vishal},
	booktitle={Proc. IEEE International Conference on Computer Vision (ICCV)},
	pages={1879--1888},
	year={2017},
}%%%%%%%

@inproceedings{ma2019bayesian,
  title={Bayesian loss for crowd count estimation with point supervision},
  author={Ma, Zhiheng and Wei, Xing and Hong, Xiaopeng and Gong, Yihong},
  booktitle={Proc. IEEE/CVF International Conference on Computer Vision (ICCV)},
  pages={6142--6151},
  year={2019}
}
@inproceedings{xu2019learn,
  title={Learn to Scale: Generating Multipolar Normalized Density Maps for Crowd Counting},
  author={Xu, Chenfeng and Qiu, Kai and Fu, Jianlong and Bai, Song and Xu, Yongchao and Bai, Xiang},
  booktitle={Proc. IEEE/CVF International Conference on Computer Vision (ICCV)},
  pages={8382--8390},
  year={2019}
}
@inproceedings{chattopadhyay2017counting,
  title={Counting everyday objects in everyday scenes},
  author={Chattopadhyay, Prithvijit and Vedantam, Ramakrishna and Selvaraju, Ramprasaath R and Batra, Dhruv and Parikh, Devi},
  booktitle={Proc. IEEE Conference on Computer Vision and Pattern Recognition (CVPR)},
  pages={1135--1144},
  year={2017}
}
@inproceedings{ranjan2018iterative,
	title={Iterative crowd counting},
	author={Ranjan, Viresh and Le, Hieu and Hoai, Minh},
	booktitle={Proc.  European Conference on Computer Vision (ECCV)},
	pages={270--285},
	year={2018}
}

@article{mnih2013playing,
	title={Playing atari with deep reinforcement learning},
	author={Mnih, Volodymyr and Kavukcuoglu, Koray and Silver, David and Graves, Alex and Antonoglou, Ioannis and Wierstra, Daan and Riedmiller, Martin},
	journal={arXiv preprint arXiv:1312.5602},
	year={2013}
}
@inproceedings{idrees2018composition,
	title={Composition loss for counting, density map estimation and localization in dense crowds},
	author={Idrees, Haroon and Tayyab, Muhmmad and Athrey, Kishan and Zhang, Dong and Al-Maadeed, Somaya and Rajpoot, Nasir and Shah, Mubarak},
	booktitle={Proc. European Conference on Computer Vision (ECCV)},
	pages={532--546},
	year={2018}
}%%%%%%%%%
@techreport{lin1993reinforcement,
	title={Reinforcement learning for robots using neural networks},
	author={Lin, Long-Ji},
	year={1993},
	institution={Carnegie-Mellon Univ Pittsburgh PA School of Computer Science}
}

@inproceedings{kong2017collaborative,
	title={Collaborative deep reinforcement learning for joint object search},
	author={Kong, Xiangyu and Xin, Bo and Wang, Yizhou and Hua, Gang},
	booktitle={Proc. IEEE Conference on Computer Vision and Pattern Recognition (CVPR)},
	pages={1695--1704},
	year={2017}
}

@inproceedings{zhang2016single,
	title={Single-image crowd counting via multi-column convolutional neural network},
	author={Zhang, Yingying and Zhou, Desen and Chen, Siqin and Gao, Shenghua and Ma, Yi},
	booktitle={Proc. IEEE Conference on Computer Vision and Pattern Recognition (CVPR)},
	pages={589--597},
	year={2016}
}%%%%%%%

@article{mnih2015human,
	title={Human-level control through deep reinforcement learning},
	author={Mnih, Volodymyr and Kavukcuoglu, Koray and Silver, David and Rusu, Andrei A and Veness, Joel and Bellemare, Marc G and Graves, Alex and Riedmiller, Martin and Fidjeland, Andreas K and Ostrovski, Georg and others},
	journal={Nature},
	volume={518},
	number={7540},
	pages={529},
	year={2015},
	publisher={Nature Publishing Group}
}
@inproceedings{Dalal2005Histograms,
	title={Histograms of oriented gradients for human detection},
	author={Dalal, N. and Triggs, B.},
	booktitle={Proc. IEEE Conference on Computer Vision and Pattern Recognition (CVPR)},
	pages={886--893},
	year={2005},
}%%%%%%%%%

@inproceedings{long2015fully,
  title={Fully convolutional networks for semantic segmentation},
  author={Long, Jonathan and Shelhamer, Evan and Darrell, Trevor},
  booktitle={Proc. IEEE Conference on Computer Vision and Pattern Recognition (CVPR)},
  pages={3431--3440},
  year={2015}
}

@inproceedings{Rabaud2006, 
	author={V. {Rabaud} and S. {Belongie}}, 
	booktitle={Proc. IEEE Conference on Computer Vision and Pattern Recognition (CVPR)},
	title={Counting Crowded Moving Objects}, 
	year={2006}, 
	volume={1}, 
	number={}, 
	pages={705--711}, 
}
@inproceedings{sam2017switching,
	title={Switching convolutional neural network for crowd counting},
	author={Sam, Deepak Babu and Surya, Shiv and Babu, R Venkatesh},
	booktitle={Proc. IEEE Conference on Computer Vision and Pattern Recognition (CVPR)},
	year={2017}
}%%%%%%%%%

@inproceedings{O2016Towards,
	title={Towards Perspective-Free Object Counting with Deep Learning},
	author={Oñoro-Rubio, Daniel and López-Sastre, R.},
	booktitle={Proc. European Conference on Computer Vision (ECCV)},
	pages={615--629},
	year={2016},
}%%%%%%%%

@inproceedings{Guerrero2015Extremely,
	title={Extremely Overlapping Vehicle Counting},
	author={Guerrero-Gómez-Olmedo, Ricardo and Torre-Jiménez, Beatriz and López-Sastre, Roberto and Maldonado-Bascón, Saturnino and Oñoro-Rubio, Daniel},
	booktitle={Iberian Conference on Pattern Recognition and Image Analysis},
	pages={423-431},
	year={2015},
}%%%%%

@inproceedings{zhang2015cross,
	title={Cross-scene crowd counting via deep convolutional neural networks},
	author={Zhang, Cong and Li, Hongsheng and Wang, Xiaogang and Yang, Xiaokang},
	booktitle={Proc. IEEE Conference on Computer Vision and Pattern Recognition (CVPR)},
	pages={833--841},
	year={2015}
}%%%%%%%%

@inproceedings{Xiong2019CLOSE,
	title={From Open Set to Closed Set: Counting Objects by Spatial Divide-and-Conquer},
	author={Xiong, Haipeng and Lu, Hao and Liu, Chengxin and Liang, Liu and Cao, Zhiguo and Shen, Chunhua},
	booktitle={Proc. IEEE/CVF International Conference on Computer Vision (ICCV)},
	pages={8362--8371},
	year={2019},
	
}

@article{liu2019countingobject,
	author = {Liu, Liang and Lu, Hao and Xiong, Haipeng and Xian, Ke and Cao, Zhiguo and Shen, Chunhua},
	year = {2019},
	title = {Counting Objects by Blockwise Classification},
	journal = {IEEE Transactions on Circuits and Systems for Video Technology},
}

@article{simonyan2014very,
	title={Very deep convolutional networks for large-scale image recognition},
	author={Simonyan, Karen and Zisserman, Andrew},
	journal={arXiv preprint arXiv:1409.1556},
	year={2014}
}

@inproceedings{li2018csrnet,
	title={{CSRNet}: Dilated convolutional neural networks for understanding the highly congested scenes},
	author={Li, Yuhong and Zhang, Xiaofan and Chen, Deming},
	booktitle={Proc. IEEE Conference on Computer Vision and Pattern Recognition (CVPR)},
	pages={1091--1100},
	year={2018}
}

@article{lu2017tasselnet,
	title={{TasselNet}: counting maize tassels in the wild via local counts regression network},
	author={Lu, Hao and Cao, Zhiguo and Xiao, Yang and Zhuang, Bohan and Shen, Chunhua},
	journal={Plant methods},
	volume={13},
	number={1},
	pages={79},
	year={2017},
	publisher={BioMed Central}
}
@INPROCEEDINGS{paul2017count, 
	author={J. P. {Cohen} and G. {Boucher} and C. A. {Glastonbury} and H. Z. {Lo} and Y. {Bengio}}, 
	booktitle={Proc. IEEE International Conference on Computer Vision Workshops (ICCVW)}, 
	title={Count-ception: Counting by Fully Convolutional Redundant Counting}, 
	year={2017}, 
	volume={}, 
	number={}, 
	pages={18--26}, 
	keywords={neural nets;object detection;regression analysis;object localization;count map;redundant counts;smaller regression network;redundant predictions;deep neural network architecture;Count-ception network;fully convolutional redundant counting;digital images;Kernel;Image segmentation;Predictive models;Training;Conferences;Digital images}, 
	doi={10.1109/ICCVW.2017.9}, 
	ISSN={2473-9944}, 
	month={Oct},}

@inproceedings{chan2008privacy,
  title={Privacy preserving crowd monitoring: Counting people without people models or tracking},
  author={Chan, Antoni B and Liang, Zhang-Sheng John and Vasconcelos, Nuno},
  booktitle={Proc. IEEE Conference on Computer Vision and Pattern Recognition (CVPR)},
  pages={1--7},
  year={2008},
  organization={IEEE}
}

@inproceedings{chen2012feature,
  title={Feature mining for localised crowd counting},
  author={Chen, Ke and Loy, Chen Change and Gong, Shaogang and Xiang, Tony},
  booktitle={Proc. British Machine Vision Conference (BMVC)},
  pages={3},
  year={2012}
}


@inproceedings{shi2019revisiting,
  title={Revisiting perspective information for efficient crowd counting},
  author={Shi, Miaojing and Yang, Zhaohui and Xu, Chao and Chen, Qijun},
  booktitle={Proc. IEEE/CVF Conference on Computer Vision and Pattern Recognition (CVPR)},
  pages={7279--7288},
  year={2019}
}

@inproceedings{laradji2018blobs,
  title={Where are the blobs: Counting by localization with point supervision},
  author={Laradji, Issam H and Rostamzadeh, Negar and Pinheiro, Pedro O and Vazquez, David and Schmidt, Mark},
  booktitle={Proc. European Conference on Computer Vision (ECCV)},
  pages={547--562},
  year={2018}
}

@inproceedings{yun2017action,
  title={Action-decision networks for visual tracking with deep reinforcement learning},
  author={Yun, Sangdoo and Choi, Jongwon and Yoo, Youngjoon and Yun, Kimin and Young Choi, Jin},
  booktitle={Proc. IEEE Conference on Computer Vision and Pattern Recognition (CVPR)},
  pages={2711--2720},
  year={2017}
}

% traditional methods

@inproceedings{leibe2005pedestrian,
  title={Pedestrian detection in crowded scenes},
  author={Leibe, Bastian and Seemann, Edgar and Schiele, Bernt},
  booktitle={Proc. IEEE Conference on Computer Vision and Pattern Recognition (CVPR)},
  volume={1},
  pages={878--885},
  year={2005},
  organization={IEEE}
}

@inproceedings{brostow2006unsupervised,
  title={Unsupervised bayesian detection of independent motion in crowds},
  author={Brostow, Gabriel J and Cipolla, Roberto},
  booktitle={Proc. IEEE Conference on Computer Vision and Pattern Recognition (CVPR)},
  volume={1},
  pages={594--601},
  year={2006},
  organization={IEEE}
}

@article{tuzel2008pedestrian,
  title={Pedestrian detection via classification on riemannian manifolds},
  author={Tuzel, Oncel and Porikli, Fatih and Meer, Peter},
  journal={IEEE Transactions on Pattern Analysis and Machine Intelligence},
  volume={30},
  number={10},
  pages={1713--1727},
  year={2008},
  publisher={IEEE}
}

@inproceedings{dollar2008multiple,
  title={Multiple component learning for object detection},
  author={Doll{\'a}r, Piotr and Babenko, Boris and Belongie, Serge and Perona, Pietro and Tu, Zhuowen},
  booktitle={Proc. European Conference on Computer Vision (ECCV)},
  pages={211--224},
  year={2008},
  organization={Springer}
}

@article{felzenszwalb2009object,
  title={Object detection with discriminatively trained part-based models},
  author={Felzenszwalb, Pedro F and Girshick, Ross B and McAllester, David and Ramanan, Deva},
  journal={IEEE Transactions on Pattern Analysis and Machine Intelligence},
  volume={32},
  number={9},
  pages={1627--1645},
  year={2009},
  publisher={IEEE}
}

@article{idrees2015detecting,
  title={Detecting humans in dense crowds using locally-consistent scale prior and global occlusion reasoning},
  author={Idrees, Haroon and Soomro, Khurram and Shah, Mubarak},
  journal={IEEE Transactions on Pattern Analysis and Machine Intelligence},
  
  volume={37},
  number={10},
  pages={1986--1998},
  year={2015},
  publisher={IEEE}
}

@article{sindagi2018survey,
  title={A survey of recent advances in cnn-based single image crowd counting and density estimation},
  author={Sindagi, Vishwanath A and Patel, Vishal M},
  journal={Pattern Recognition Letters},
  volume={107},
  pages={3--16},
  year={2018},
  publisher={Elsevier}
}

@inproceedings{chan2009bayesian,
  title={Bayesian poisson regression for crowd counting},
  author={Chan, Antoni B and Vasconcelos, Nuno},
  booktitle={Proc. IEEE International Conference on Computer Vision (ICCV)},
  pages={545--551},
  year={2009},
  organization={IEEE}
}


@inproceedings{ryan2009crowd,
  title={Crowd counting using multiple local features},
  author={Ryan, David and Denman, Simon and Fookes, Clinton and Sridharan, Sridha},
  booktitle={2009 Digital Image Computing: Techniques and Applications},
  pages={81--88},
  year={2009},
  organization={IEEE}
}

@inproceedings{pham2015count,
  title={Count forest: Co-voting uncertain number of targets using random forest for crowd density estimation},
  author={Pham, Viet-Quoc and Kozakaya, Tatsuo and Yamaguchi, Osamu and Okada, Ryuzo},
  booktitle={Proc. IEEE International Conference on Computer Vision (ICCV)},
  pages={3253--3261},
  year={2015}
}

@inproceedings{wang2016fast,
  title={Fast visual object counting via example-based density estimation},
  author={Wang, Yi and Zou, Yuexian},
  booktitle={Proc. IEEE International Conference on Image Processing (ICIP)},
  pages={3653--3657},
  year={2016},
  organization={IEEE}
}

@inproceedings{xu2016crowd,
  title={Crowd density estimation based on rich features and random projection forest},
  author={Xu, Bolei and Qiu, Guoping},
  booktitle={Proc. IEEE Winter Conference on Applications of Computer Vision (WACV)},
  pages={1--8},
  year={2016},
  organization={IEEE}
}

% --------------------------------------------------

% 2015
@inproceedings{wang2015deep,
  title={Deep people counting in extremely dense crowds},
  author={Wang, Chuan and Zhang, Hua and Yang, Liang and Liu, Si and Cao, Xiaochun},
  booktitle={Proc. ACM International Conference on Multimedia (ACMMM)},
  pages={1299--1302},
  year={2015},
  organization={ACM}
}

@article{fu2015fast,
  title={Fast crowd density estimation with convolutional neural networks},
  author={Fu, Min and Xu, Pei and Li, Xudong and Liu, Qihe and Ye, Mao and Zhu, Ce},
  journal={Engineering Applications of Artificial Intelligence},
  volume={43},
  pages={81--88},
  year={2015},
  publisher={Elsevier}
}

% 2016
@inproceedings{boominathan2016crowdnet,
  title={Crowdnet: A deep convolutional network for dense crowd counting},
  author={Boominathan, Lokesh and Kruthiventi, Srinivas SS and Babu, R Venkatesh},
  booktitle={Proc. ACM International Conference on Multimedia (ACMMM)},
  pages={640--644},
  year={2016},
  organization={ACM}
}

@inproceedings{arteta2016counting,
  title={Counting in the wild},
  author={Arteta, Carlos and Lempitsky, Victor and Zisserman, Andrew},
  booktitle={Proc. European Conference on Computer Vision (ECCV)},
  pages={483--498},
  year={2016},
  organization={Springer}
}

@inproceedings{walach2016learning,
  title={Learning to count with cnn boosting},
  author={Walach, Elad and Wolf, Lior},
  booktitle={Proc. European Conference on Computer Vision (ECCV)},
  pages={660--676},
  year={2016},
  organization={Springer}
}


@inproceedings{sindagi2017cnn,
  title={Cnn-based cascaded multi-task learning of high-level prior and density estimation for crowd counting},
  author={Sindagi, Vishwanath A and Patel, Vishal M},
  booktitle={Proc. IEEE International Conference on Advanced Video and Signal Based Surveillance (AVSS)},
  pages={1--6},
  year={2017},
  organization={IEEE}
}


% 2018


@inproceedings{liu2018decidenet,
  title={Decidenet: Counting varying density crowds through attention guided detection and density estimation},
  author={Liu, Jiang and Gao, Chenqiang and Meng, Deyu and Hauptmann, Alexander G},
  booktitle={Proc. IEEE Conference on Computer Vision and Pattern Recognition (CVPR)},
  pages={5197--5206},
  year={2018}
}


@inproceedings{shen2018crowd,
  title={Crowd counting via adversarial cross-scale consistency pursuit},
  author={Shen, Zan and Xu, Yi and Ni, Bingbing and Wang, Minsi and Hu, Jianguo and Yang, Xiaokang},
  booktitle={Proc. IEEE Conference on Computer Vision and Pattern Recognition (CVPR)},
  pages={5245--5254},
  year={2018}
}


@inproceedings{liu2018leveraging,
  title={Leveraging unlabeled data for crowd counting by learning to rank},
  author={Liu, Xialei and van de Weijer, Joost and Bagdanov, Andrew D},
  booktitle={Proc. IEEE Conference on Computer Vision and Pattern Recognition (CVPR)},
  pages={7661--7669},
  year={2018}
}


@inproceedings{cao2018scale,
  title={Scale aggregation network for accurate and efficient crowd counting},
  author={Cao, Xinkun and Wang, Zhipeng and Zhao, Yanyun and Su, Fei},
  booktitle={Proc. European Conference on Computer Vision (ECCV)},
  pages={734--750},
  year={2018}
}

% ------- 2019
@inproceedings{liu2019point,
  title={Point in, box out: Beyond counting persons in crowds},
  author={Liu, Yuting and Shi, Miaojing and Zhao, Qijun and Wang, Xiaofang},
  booktitle={Proc. IEEE/CVF Conference on Computer Vision and Pattern Recognition (CVPR)},
  pages={6469--6478},
  year={2019}
}

@inproceedings{liu2019recurrent,
  title={Recurrent Attentive Zooming for Joint Crowd Counting and Precise Localization},
  author={Liu, Chenchen and Weng, Xinyu and Mu, Yadong},
  booktitle={Proc. IEEE/CVF Conference on Computer Vision and Pattern Recognition (CVPR)},
  pages={1217--1226},
  year={2019}
}

@inproceedings{wan2019residual,
  title={Residual Regression With Semantic Prior for Crowd Counting},
  author={Wan, Jia and Luo, Wenhan and Wu, Baoyuan and Chan, Antoni B and Liu, Wei},
  booktitle={Proc. IEEE/CVF Conference on Computer Vision and Pattern Recognition (CVPR)},
  pages={4036--4045},
  year={2019}
}

@inproceedings{johnson2017clevr,
  title={{CLEVR}: A diagnostic dataset for compositional language and elementary visual reasoning},
  author={Johnson, Justin and Hariharan, Bharath and van der Maaten, Laurens and Fei-Fei, Li and Lawrence Zitnick, C and Girshick, Ross},
  booktitle={Proc. IEEE Conference on Computer Vision and Pattern Recognition (CVPR)},
  pages={2901--2910},
  year={2017}
}

@article{stahl2018divide,
  title={Divide and count: Generic object counting by image divisions},
  author={Stahl, Tobias and Pintea, Silvia L and van Gemert, Jan C},
  journal={IEEE Transactions on Image Processing},
  volume={28},
  number={2},
  pages={1035--1044},
  year={2018},
  publisher={IEEE}
}

@inproceedings{zhang2019wide,
  title={Wide-Area Crowd Counting via Ground-Plane Density Maps and Multi-View Fusion CNNs},
  author={Zhang, Qi and Chan, Antoni B},
  booktitle={Proc. IEEE/CVF Conference on Computer Vision and Pattern Recognition (CVPR)},
  pages={8297--8306},
  year={2019}
}

@inproceedings{zhao2019leveraging,
  title={Leveraging heterogeneous auxiliary tasks to assist crowd counting},
  author={Zhao, Muming and Zhang, Jian and Zhang, Chongyang and Zhang, Wenjun},
  booktitle={Proc. IEEE/CVF Conference on Computer Vision and Pattern Recognition (CVPR)},
  pages={12736--12745},
  year={2019}
}


@InProceedings{Zhang_2019_ICCV_RANet,
author = {Zhang, Anran and Shen, Jiayi and Xiao, Zehao and Zhu, Fan and Zhen, Xiantong and Cao, Xianbin and Shao, Ling},
title = {Relational Attention Network for Crowd Counting},
booktitle = {Proc. IEEE/CVF International Conference on Computer Vision (ICCV)},
month = {October},
year = {2019}
}

@InProceedings{Zhang_2019_ICCV_ANF,
author = {Zhang, Anran and Yue, Lei and Shen, Jiayi and Zhu, Fan and Zhen, Xiantong and Cao, Xianbin and Shao, Ling},
title = {Attentional Neural Fields for Crowd Counting},
booktitle = {Proc. IEEE/CVF International Conference on Computer Vision (ICCV)},
month = {October},
year = {2019}
}


@InProceedings{Sindagi_2019_ICCV_Push,
author = {Sindagi, Vishwanath A. and Yasarla, Rajeev and Patel, Vishal M.},
title = {Pushing the Frontiers of Unconstrained Crowd Counting: New Dataset and Benchmark Method},
booktitle = {Proc. IEEE/CVF International Conference on Computer Vision (ICCV)},
month = {October},
year = {2019}
}

@InProceedings{Shi_2019_ICCV_focus_free,
author = {Shi, Zenglin and Mettes, Pascal and Snoek, Cees G. M.},
title = {Counting With Focus for Free},
booktitle = {Proc. IEEE/CVF International Conference on Computer Vision (ICCV)},
month = {October},
year = {2019}
}

@InProceedings{Cheng_2019_ICCV_Spatial_Aware,
author = {Cheng, Zhi-Qi and Li, Jun-Xiu and Dai, Qi and Wu, Xiao and Hauptmann, Alexander G.},
title = {Learning Spatial Awareness to Improve Crowd Counting},
booktitle = {Proc. IEEE/CVF International Conference on Computer Vision (ICCV)},
month = {October},
year = {2019}
}

@InProceedings{Lian_2019_CVPR_RGBD,
author = {Lian, Dongze and Li, Jing and Zheng, Jia and Luo, Weixin and Gao, Shenghua},
title = {Density Map Regression Guided Detection Network for RGB-D Crowd Counting and Localization},
booktitle={Proc. IEEE/CVF Conference on Computer Vision and Pattern Recognition (CVPR)},
month = {June},
year = {2019}
}
@inproceedings{shi2018crowd,
  title={Crowd counting with deep negative correlation learning},
  author={Shi, Zenglin and Zhang, Le and Liu, Yun and Cao, Xiaofeng and Ye, Yangdong and Cheng, Ming-Ming and Zheng, Guoyan},
  booktitle={Proc. IEEE Conference on Computer Vision and Pattern Recognition (CVPR)},
  pages={5382--5390},
  year={2018}
}

%%%%%%%%%%%%%%%%%%%%%%%%%%%%%%%%%%%%%%%%%%%%%%%%%%%%%%%%%%%%%%RL
@article{silver2016mastering,
  title={Mastering the game of Go with deep neural networks and tree search},
  author={Silver, David and Huang, Aja and Maddison, Chris J and Guez, Arthur and Sifre, Laurent and Van Den Driessche, George and Schrittwieser, Julian and Antonoglou, Ioannis and Panneershelvam, Veda and Lanctot, Marc and others},
  journal={Nature},
  volume={529},
  number={7587},
  pages={484},
  year={2016},
  publisher={Nature Publishing Group}
}
@article{vinyals2019grandmaster,
  title={Grandmaster level in StarCraft II using multi-agent reinforcement learning},
  author={Vinyals, Oriol and Babuschkin, Igor and Czarnecki, Wojciech M and Mathieu, Micha{\"e}l and Dudzik, Andrew and Chung, Junyoung and Choi, David H and Powell, Richard and Ewalds, Timo and Georgiev, Petko and others},
  journal={Nature},
  pages={1--5},
  year={2019},
  publisher={Nature Publishing Group}
}
@misc{ OpenAI_dota,
      author = {OpenAI},
      title = {OpenAI Five},
      howpublished = {\url{https://blog.openai.com/openai-five/}},
      year = {2018}
}
@article{riedmiller2009reinforcement,
  title={Reinforcement learning for robot soccer},
  author={Riedmiller, Martin and Gabel, Thomas and Hafner, Roland and Lange, Sascha},
  journal={Autonomous Robots},
  volume={27},
  number={1},
  pages={55--73},
  year={2009},
  publisher={Springer}
}
@inproceedings{diuk2008object,
  title={An object-oriented representation for efficient reinforcement learning},
  author={Diuk, Carlos and Cohen, Andre and Littman, Michael L},
  booktitle={Proc. International Conference on Machine learning (ICML)},
  pages={240--247},
  year={2008},
  organization={ACM}
}
@inproceedings{mnih2016asynchronous,
  title={Asynchronous methods for deep reinforcement learning},
  author={Mnih, Volodymyr and Badia, Adria Puigdomenech and Mirza, Mehdi and Graves, Alex and Lillicrap, Timothy and Harley, Tim and Silver, David and Kavukcuoglu, Koray},
  booktitle={Proc. International Conference on Machine Learning (ICML)},
  pages={1928--1937},
  year={2016}
}
@article{schulman2017proximal,
  title={Proximal policy optimization algorithms},
  author={Schulman, John and Wolski, Filip and Dhariwal, Prafulla and Radford, Alec and Klimov, Oleg},
  journal={arXiv preprint arXiv:1707.06347},
  year={2017}
}
@article{wang2015dueling,
  title={Dueling network architectures for deep reinforcement learning},
  author={Wang, Ziyu and Schaul, Tom and Hessel, Matteo and Van Hasselt, Hado and Lanctot, Marc and De Freitas, Nando},
  journal={arXiv preprint arXiv:1511.06581},
  year={2015}
}
@article{bueno2017hierarchical,
  title={Hierarchical object detection with deep reinforcement learning},
  author={Bueno, M{\'\i}riam Bellver and Gir{\'o}-i-Nieto, Xavier and Marqu{\'e}s, Ferran and Torres, Jordi},
  journal={Deep Learning for Image Processing Applications},
  volume={31},
  number={164},
  pages={3},
  year={2017},
  publisher={IOS Press}
}
@inproceedings{araslanov2019actor,
  title={Actor-Critic Instance Segmentation},
  author={Araslanov, Nikita and Rothkopf, Constantin A and Roth, Stefan},
  booktitle={Proc. IEEE/CVF Conference on Computer Vision and Pattern Recognition (CVPR)},
  pages={8237--8246},
  year={2019}
}
@inproceedings{duong2019automatic,
  title={Automatic Face Aging in Videos via Deep Reinforcement Learning},
  author={Duong, Chi Nhan and Luu, Khoa and Quach, Kha Gia and Nguyen, Nghia and Patterson, Eric and Bui, Tien D and Le, Ngan},
  booktitle={Proc. IEEE/CVF Conference on Computer Vision and Pattern Recognition (CVPR)},
  pages={10013--10022},
  year={2019}
}
@inproceedings{ho2016model,
	title={Model-free imitation learning with policy optimization},
	author={Ho, Jonathan and Gupta, Jayesh and Ermon, Stefano},
	booktitle={International Conference on Machine Learning (ICML)},
	pages={2760--2769},
	year={2016}
}
@article{xiong2019tasselnetv2,
	title={TasselNetv2: in-field counting of wheat spikes with context-augmented local regression networks},
	author={Xiong, Haipeng and Cao, Zhiguo and Lu, Hao and Madec, Simon and Liu, Liang and Shen, Chunhua},
	journal={Plant Methods},
	volume={15},
	number={1},
	pages={150},
	year={2019},
	publisher={Springer}
}
@article{van2001optimal,
  title={Optimal denominations for coins and bank notes: in defense of the principle of least effort},
  author={Van Hove, Leo},
  journal={Journal of Money, Credit and Banking},
  pages={1015--1021},
  year={2001},
  publisher={JSTOR}
}

@inproceedings{wang2019learning,
  title={Learning from synthetic data for crowd counting in the wild},
  author={Wang, Qi and Gao, Junyu and Lin, Wei and Yuan, Yuan},
  booktitle={Proc. IEEE/CVF Conference on Computer Vision and Pattern Recognition (CVPR)},
  pages={8198--8207},
  year={2019}
}
@inproceedings{van2016deep,
  title={Deep reinforcement learning with double q-learning},
  author={Van Hasselt, Hado and Guez, Arthur and Silver, David},
  booktitle={Thirtieth AAAI conference on artificial intelligence},
  year={2016}
}
@article{schaal1999imitation,
  title={Is imitation learning the route to humanoid robots?},
  author={Schaal, Stefan},
  journal={Trends in cognitive sciences},
  volume={3},
  number={6},
  pages={233--242},
  year={1999},
  publisher={Elsevier}
}
@article{hussein2017imitation,
  title={Imitation learning: A survey of learning methods},
  author={Hussein, Ahmed and Gaber, Mohamed Medhat and Elyan, Eyad and Jayne, Chrisina},
  journal={ACM Computing Surveys (CSUR)},
  volume={50},
  number={2},
  pages={1--35},
  year={2017},
  publisher={ACM New York, NY, USA}
}
