# Supplementary material
Source: ML conference proceedings conference paper supplement (https://www.ecva.net/papers/eccv_2020/papers_ECCV/html/123550171_ECCV_2020_paper.php)

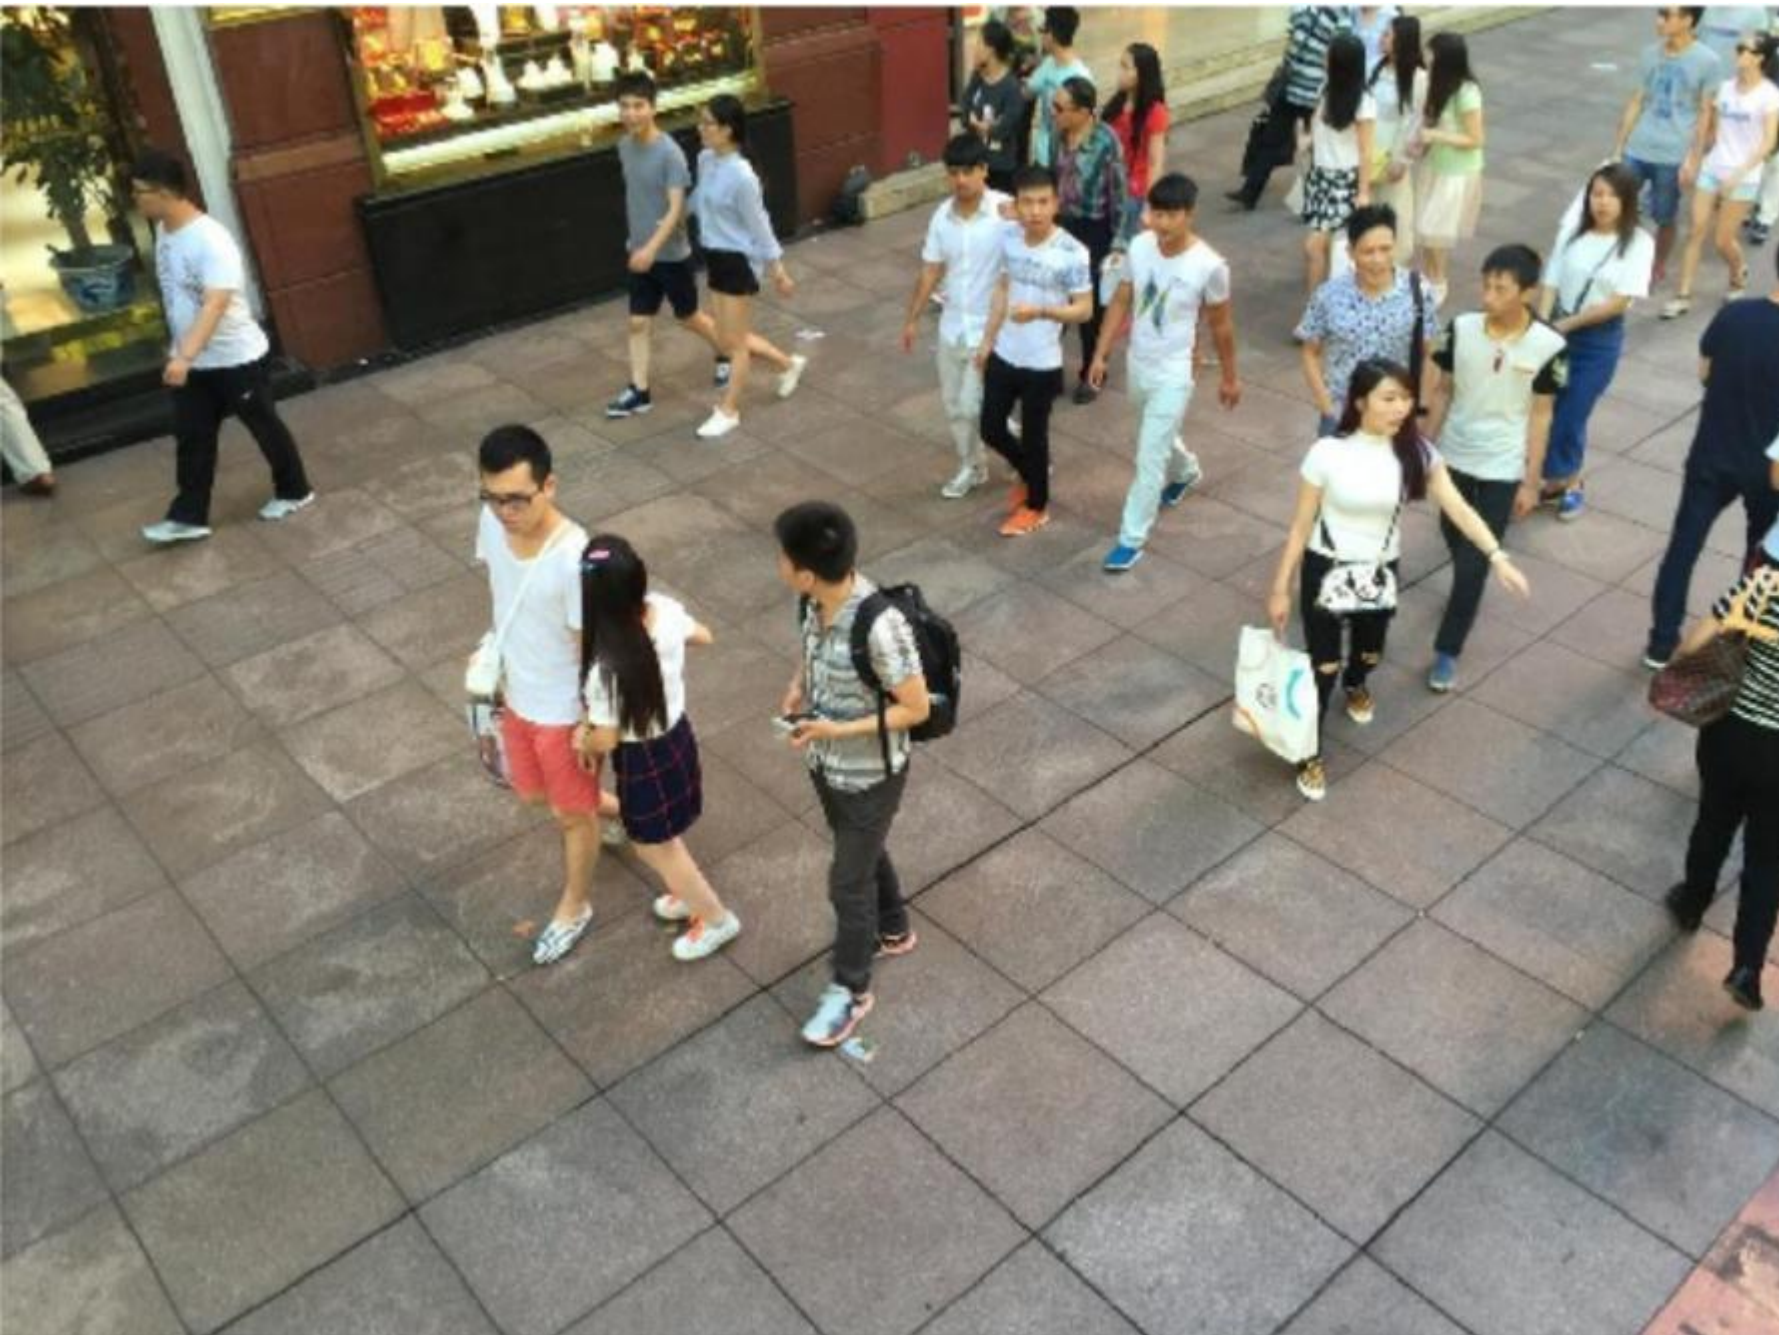

GT:23

EST:23.1

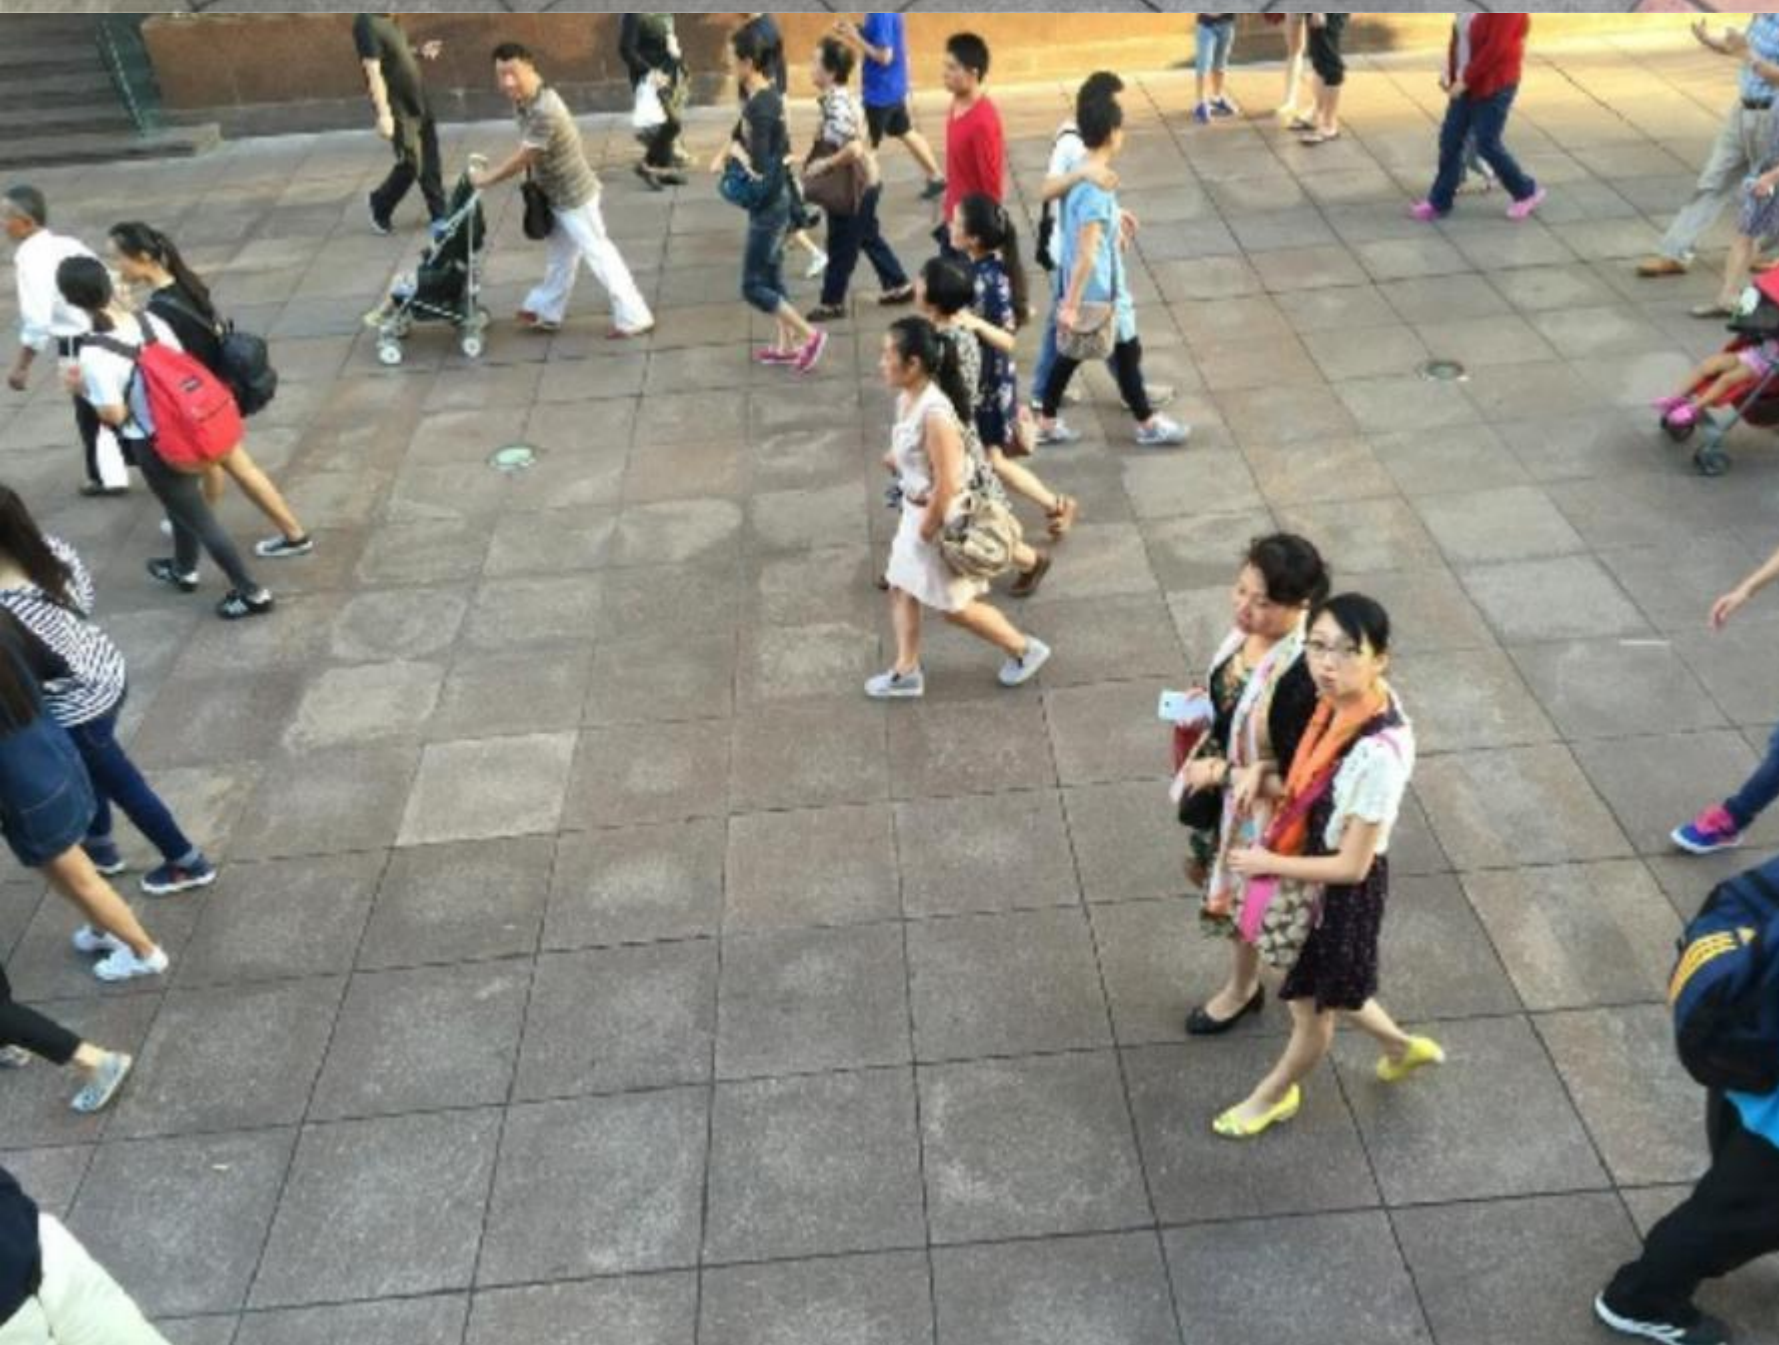

GT:15

EST:13.4

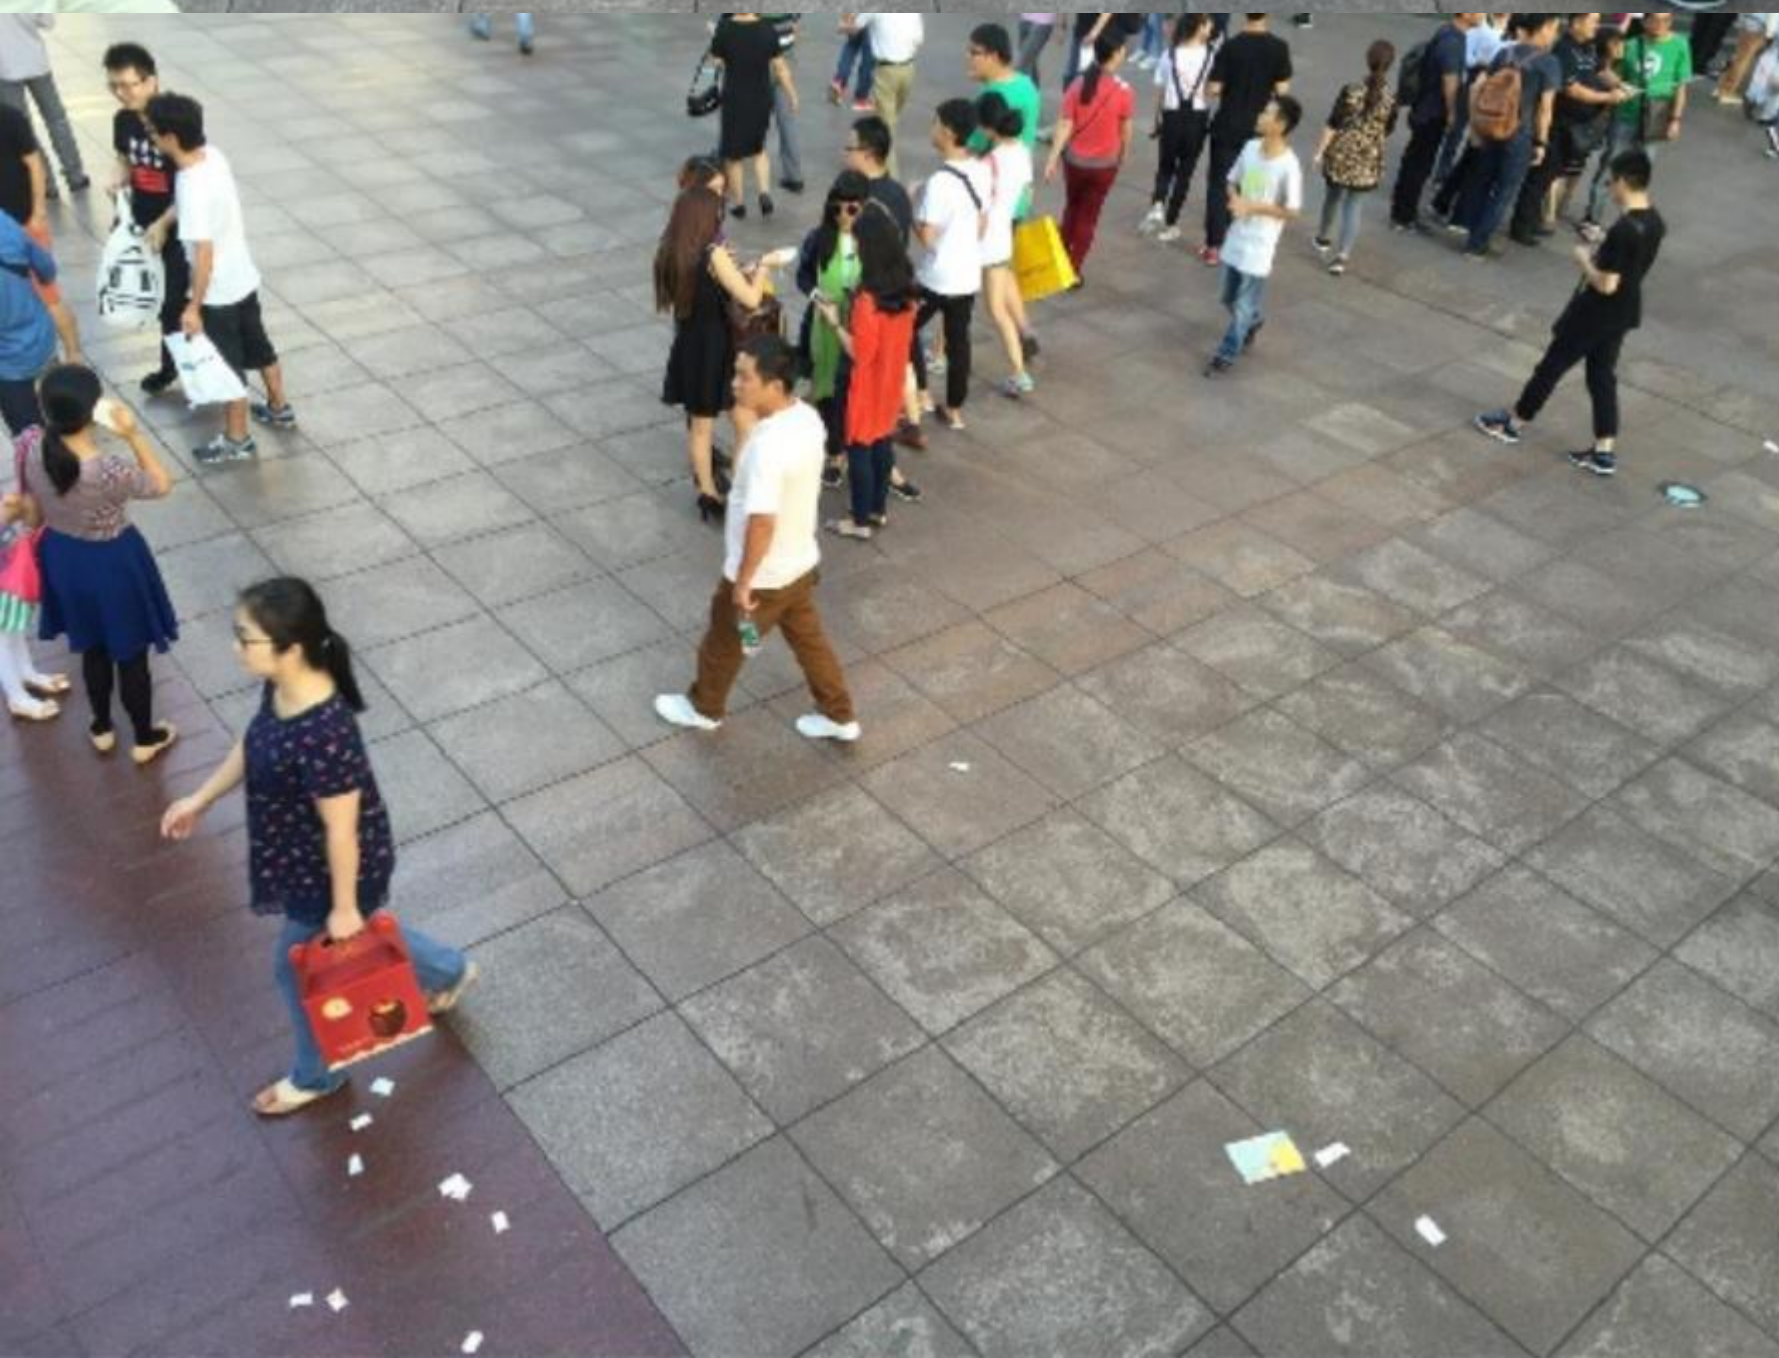

GT:26

EST:25.6

Supplement: Supplementary file 2 [file 123550171-supp.zip]

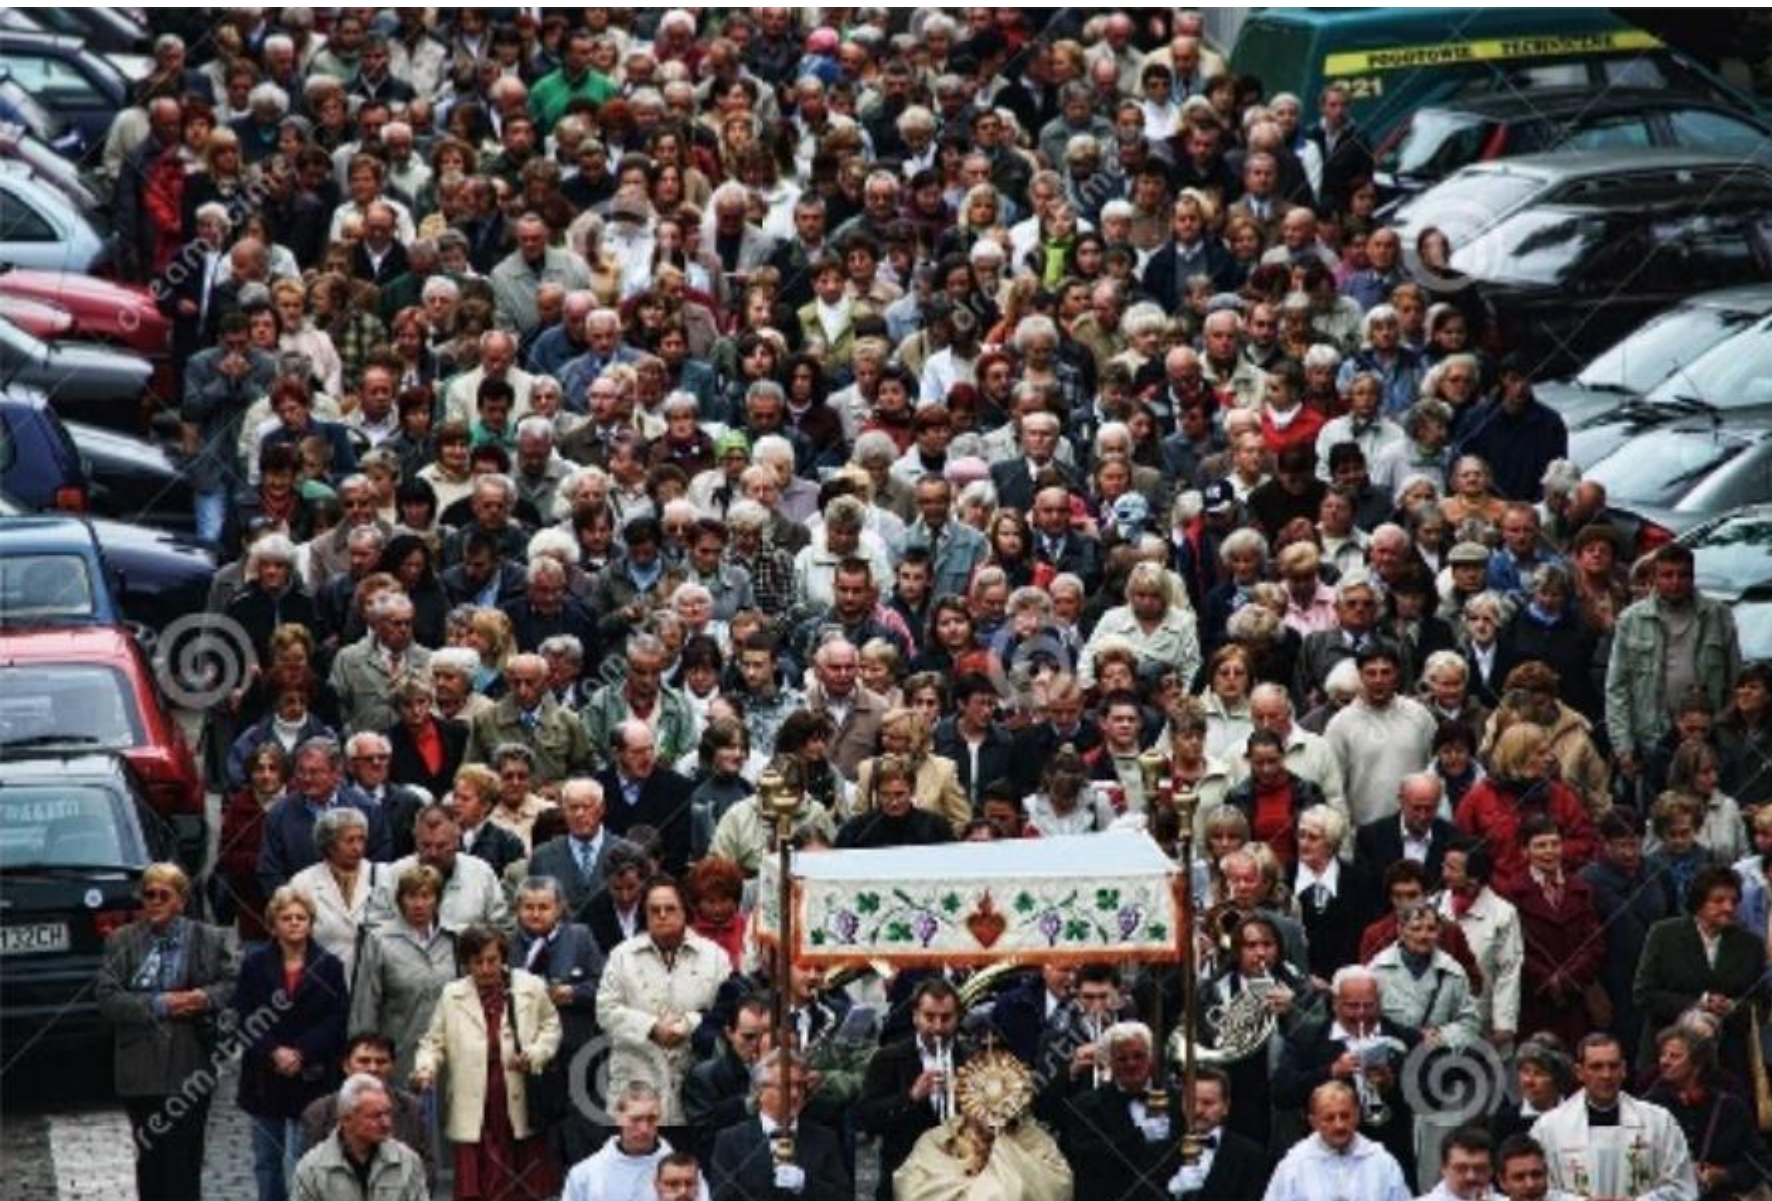

GT:361

EST:366.9

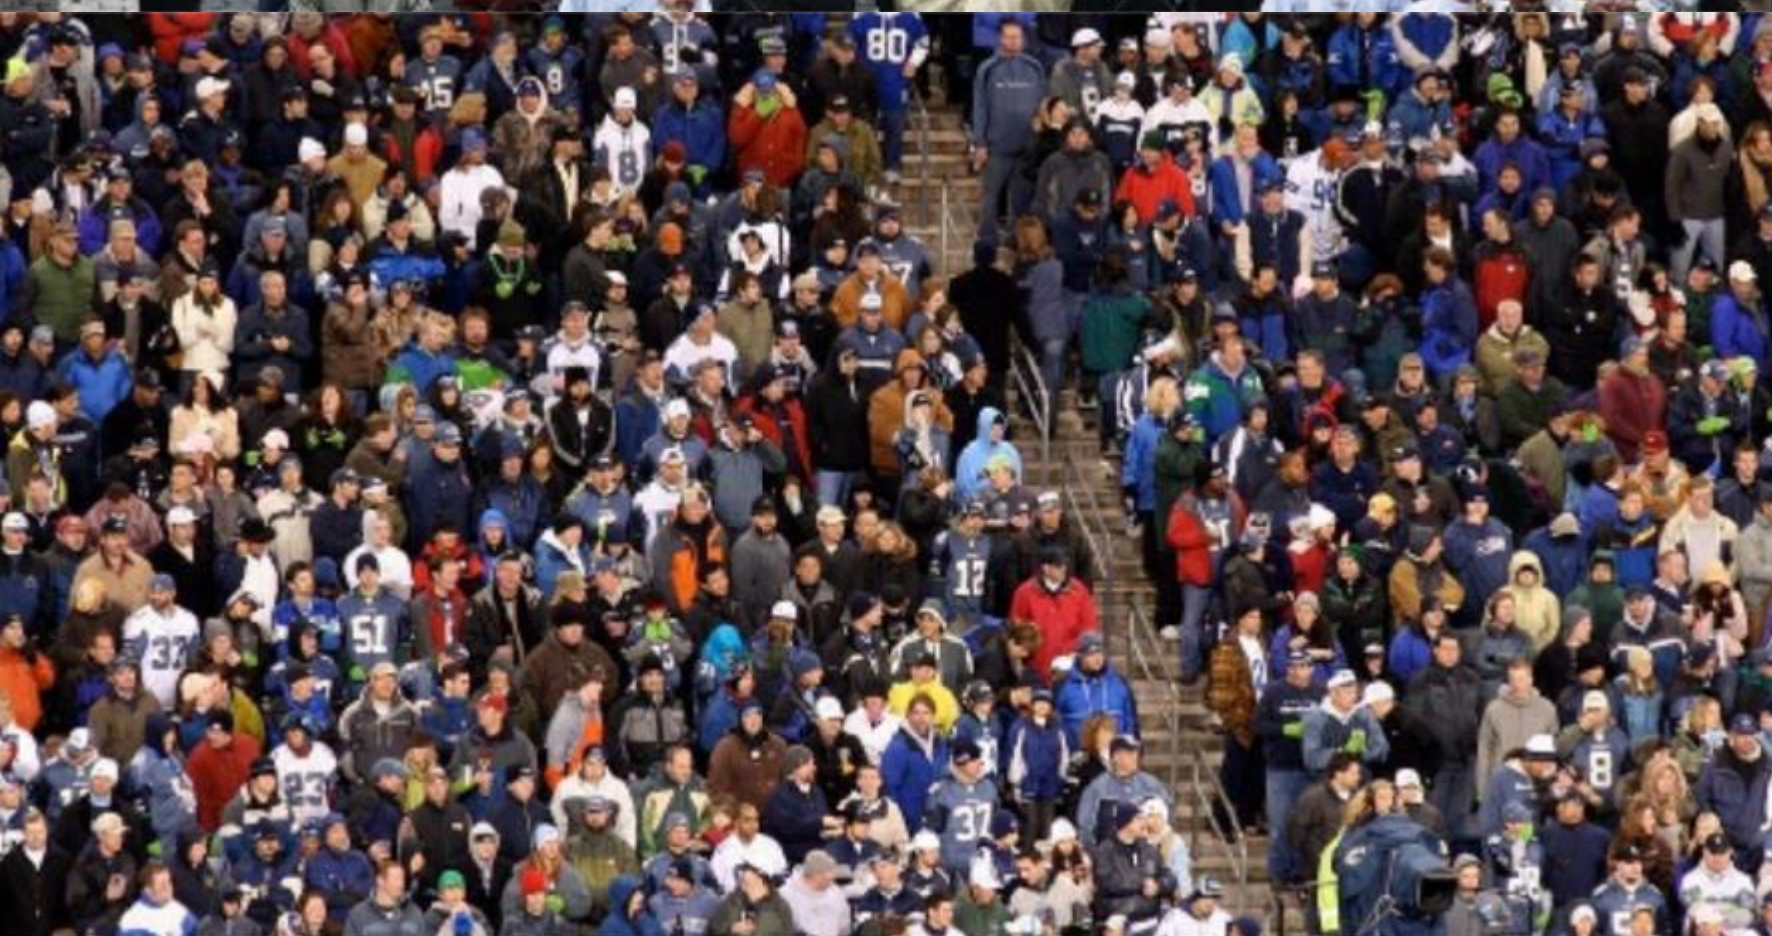

GT:384

EST:408.7

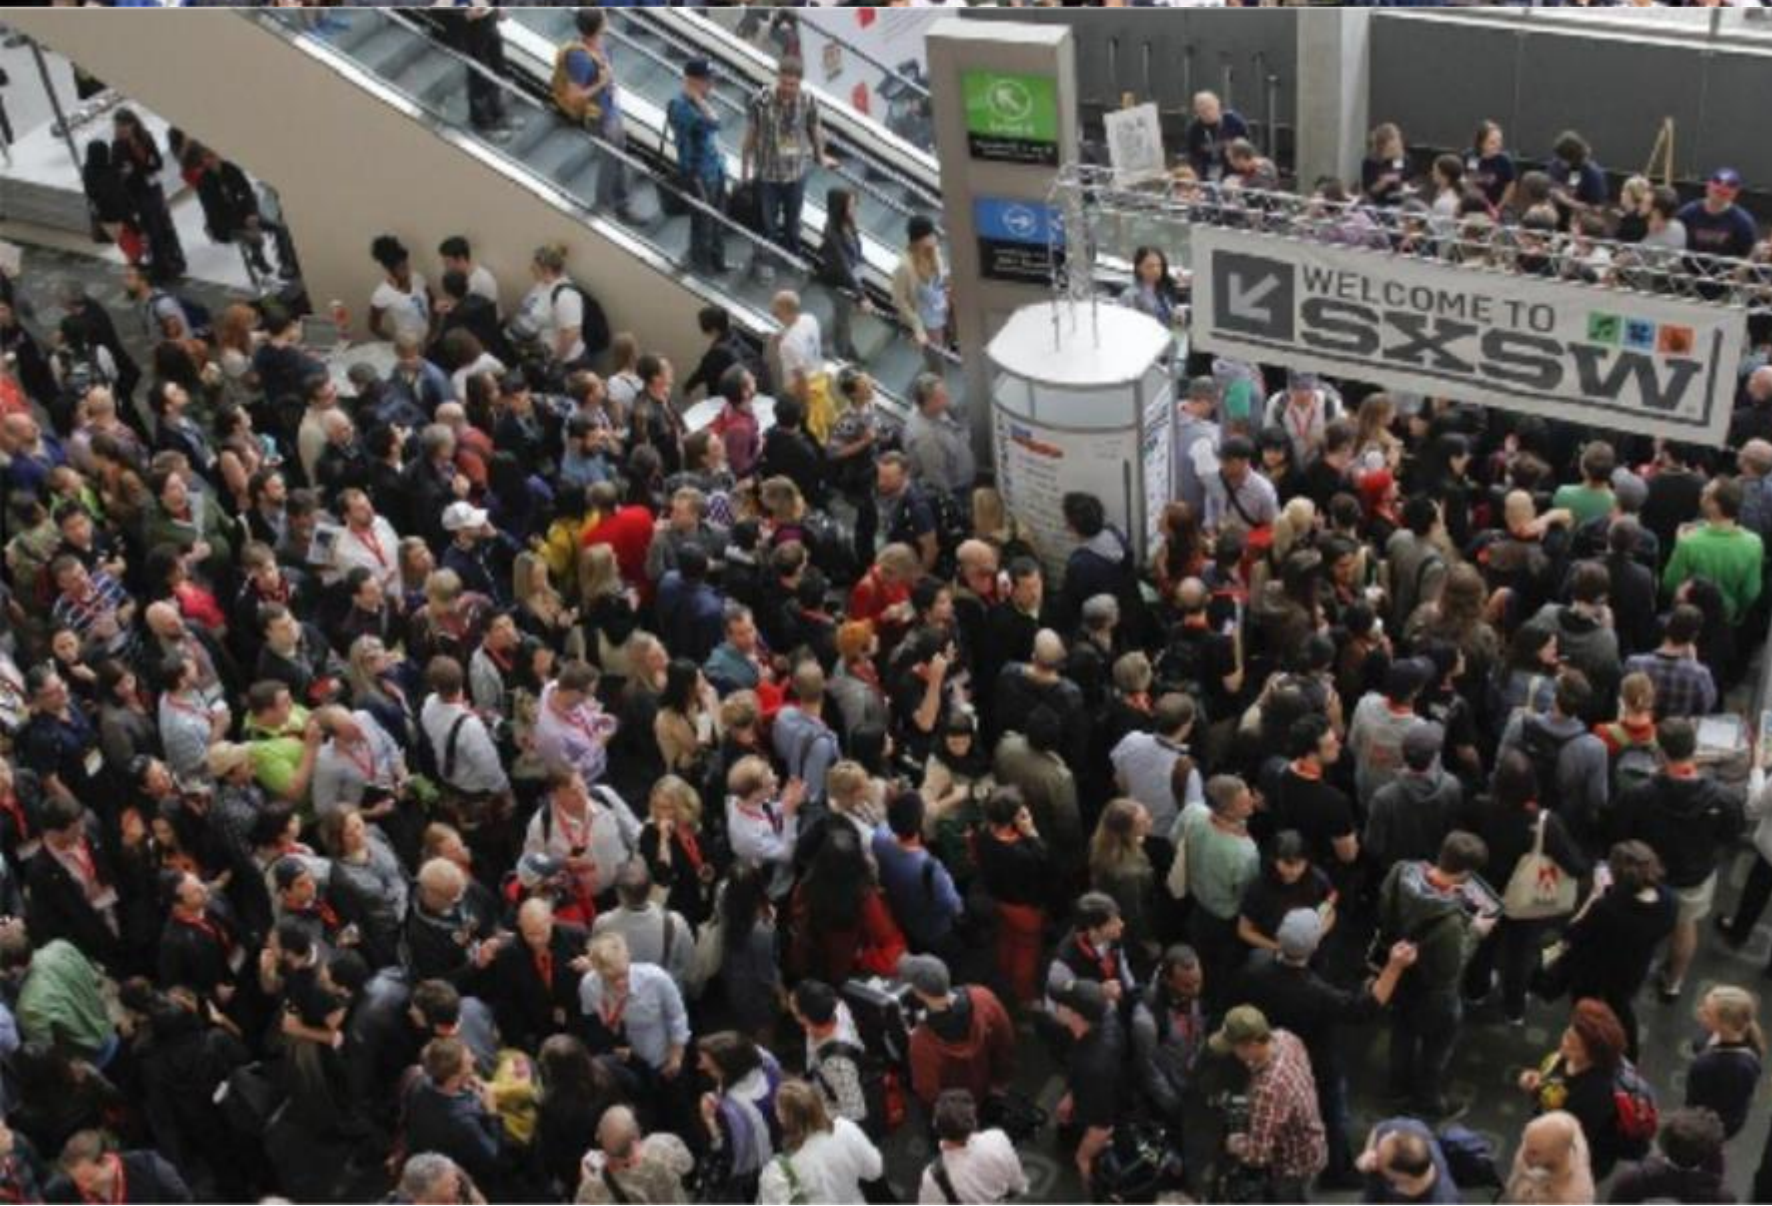

GT:218

EST:222.5

Supplement: Supplementary file 3 [file 123550171-supp.zip]

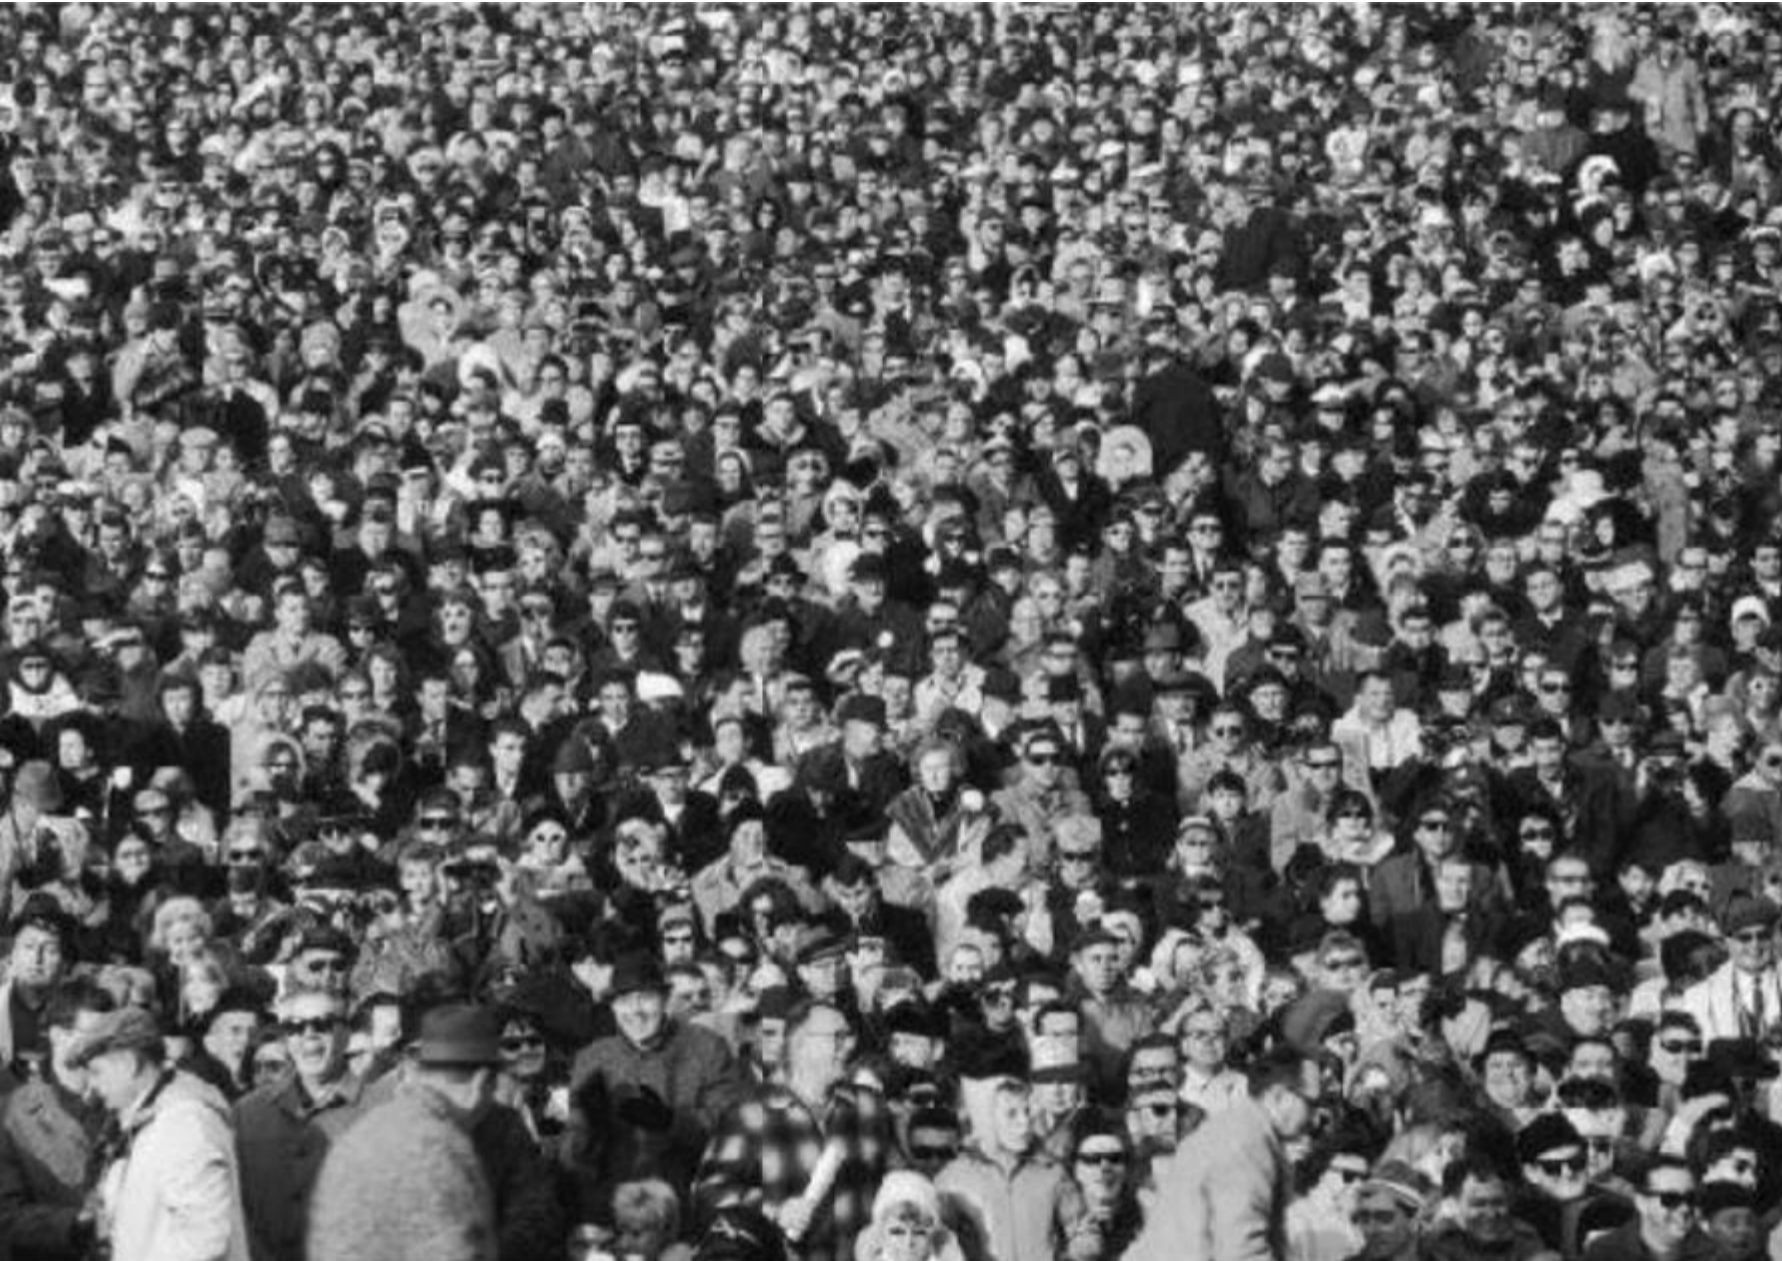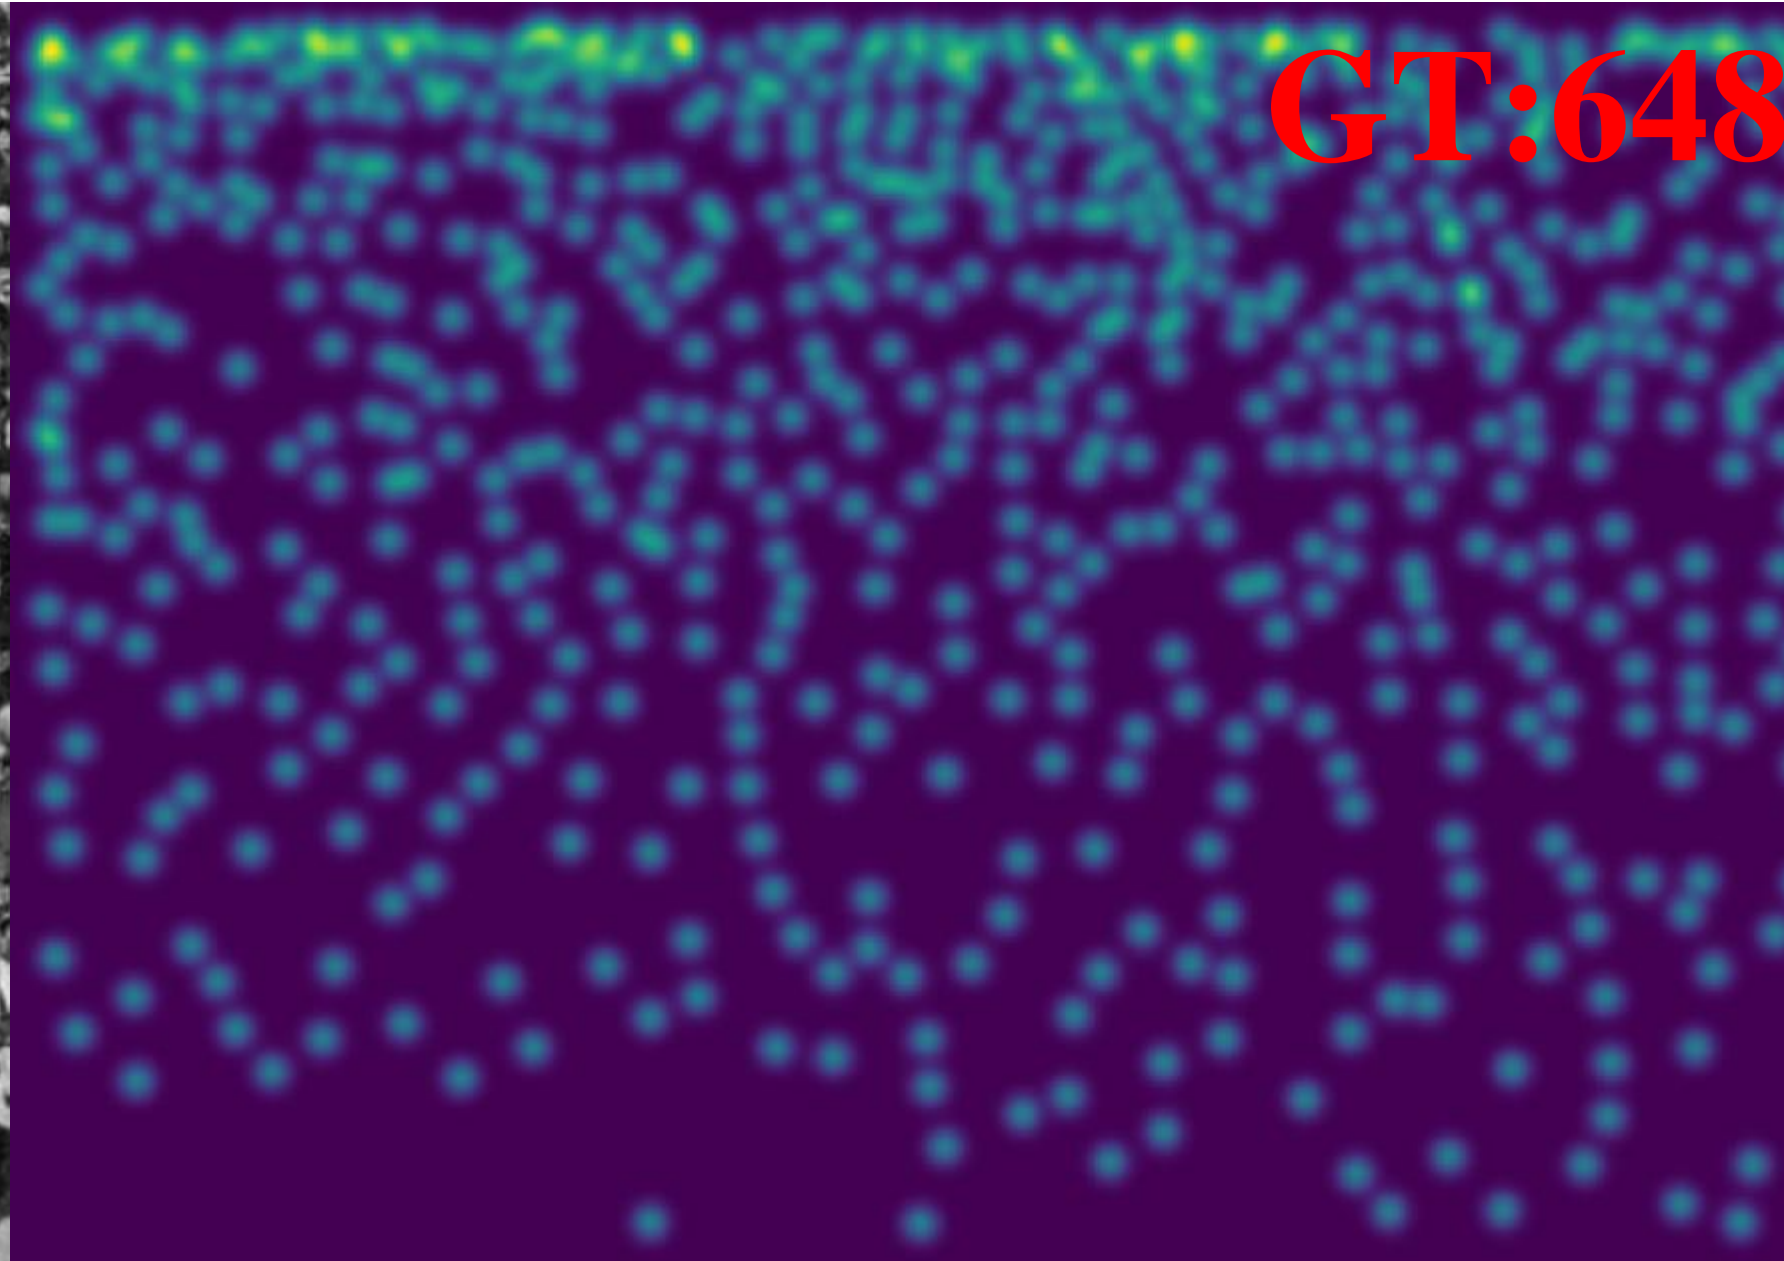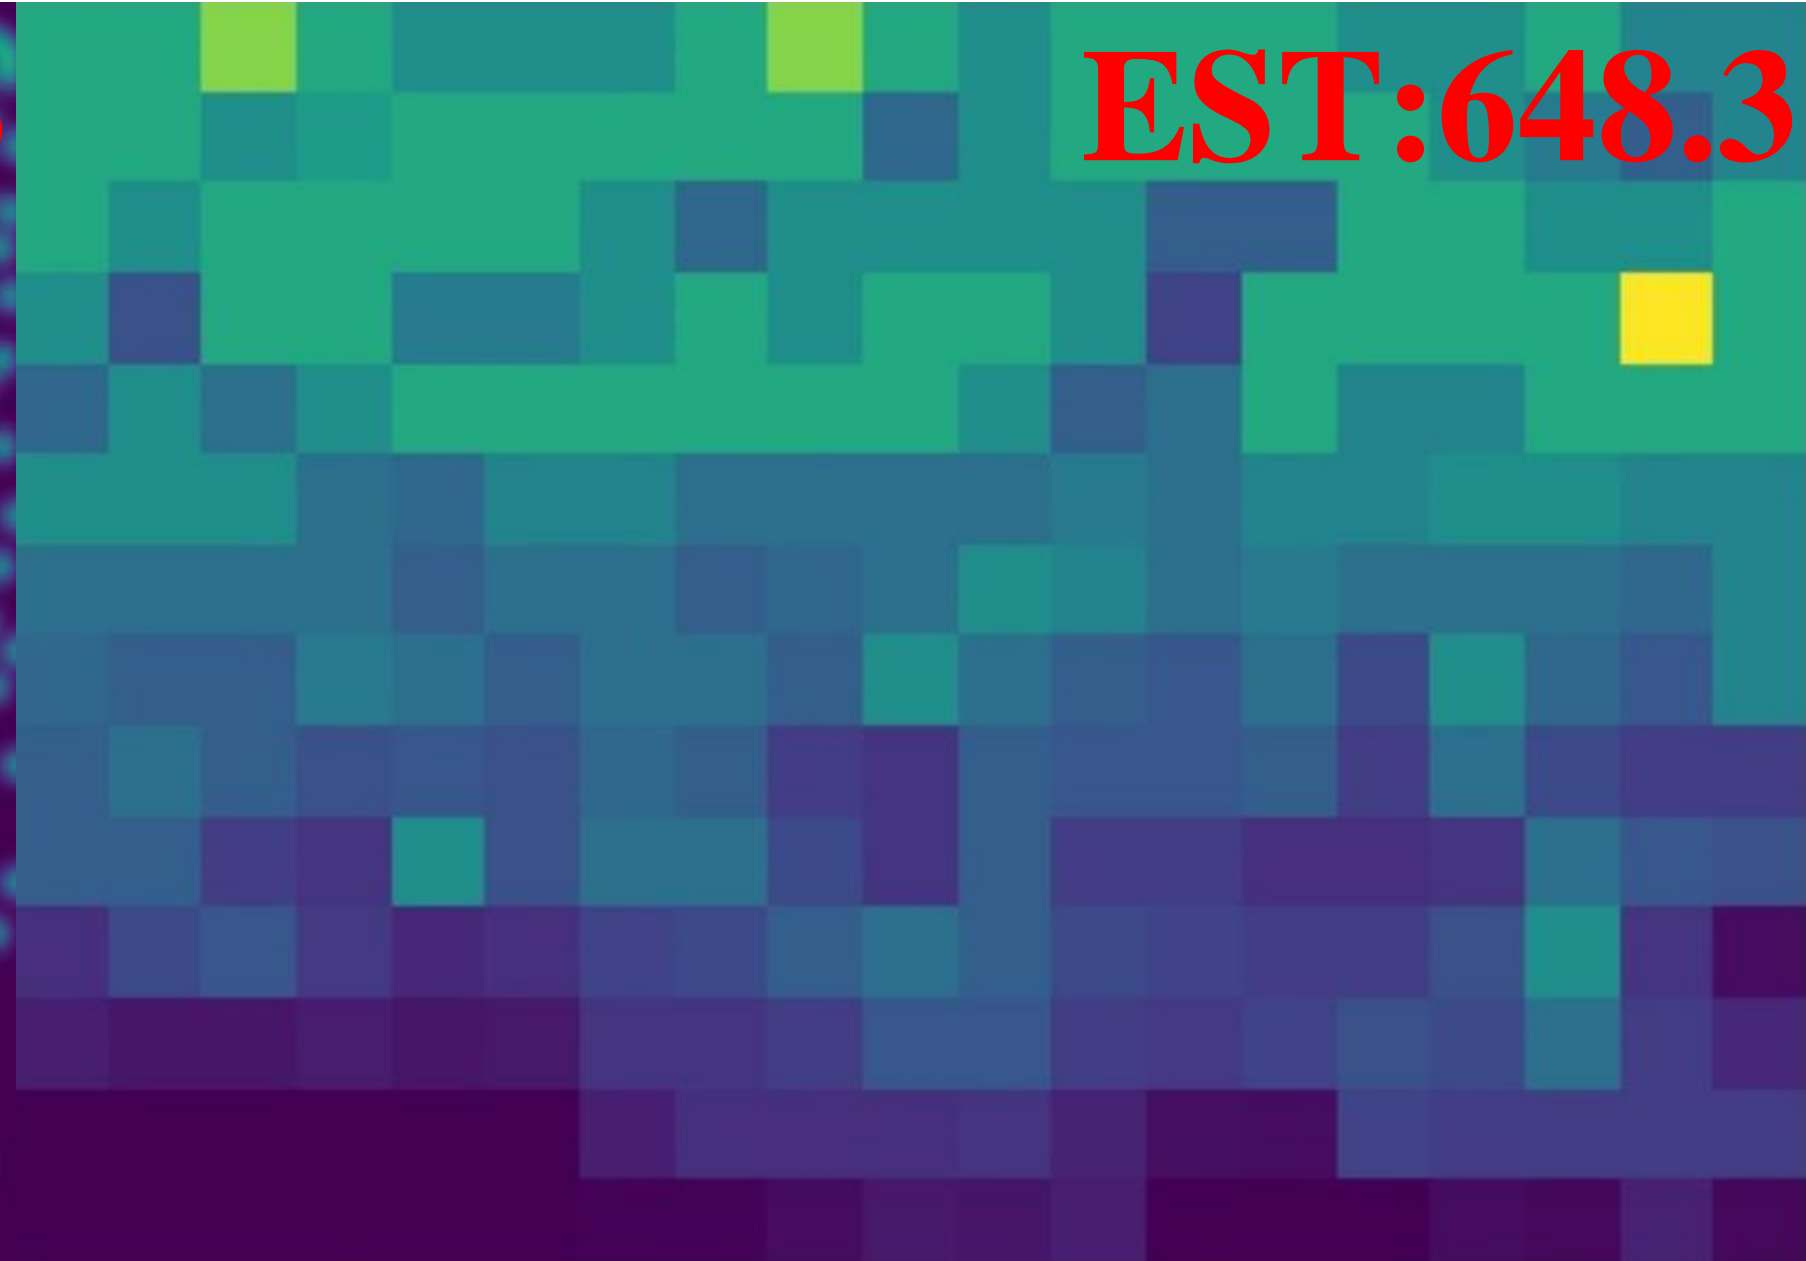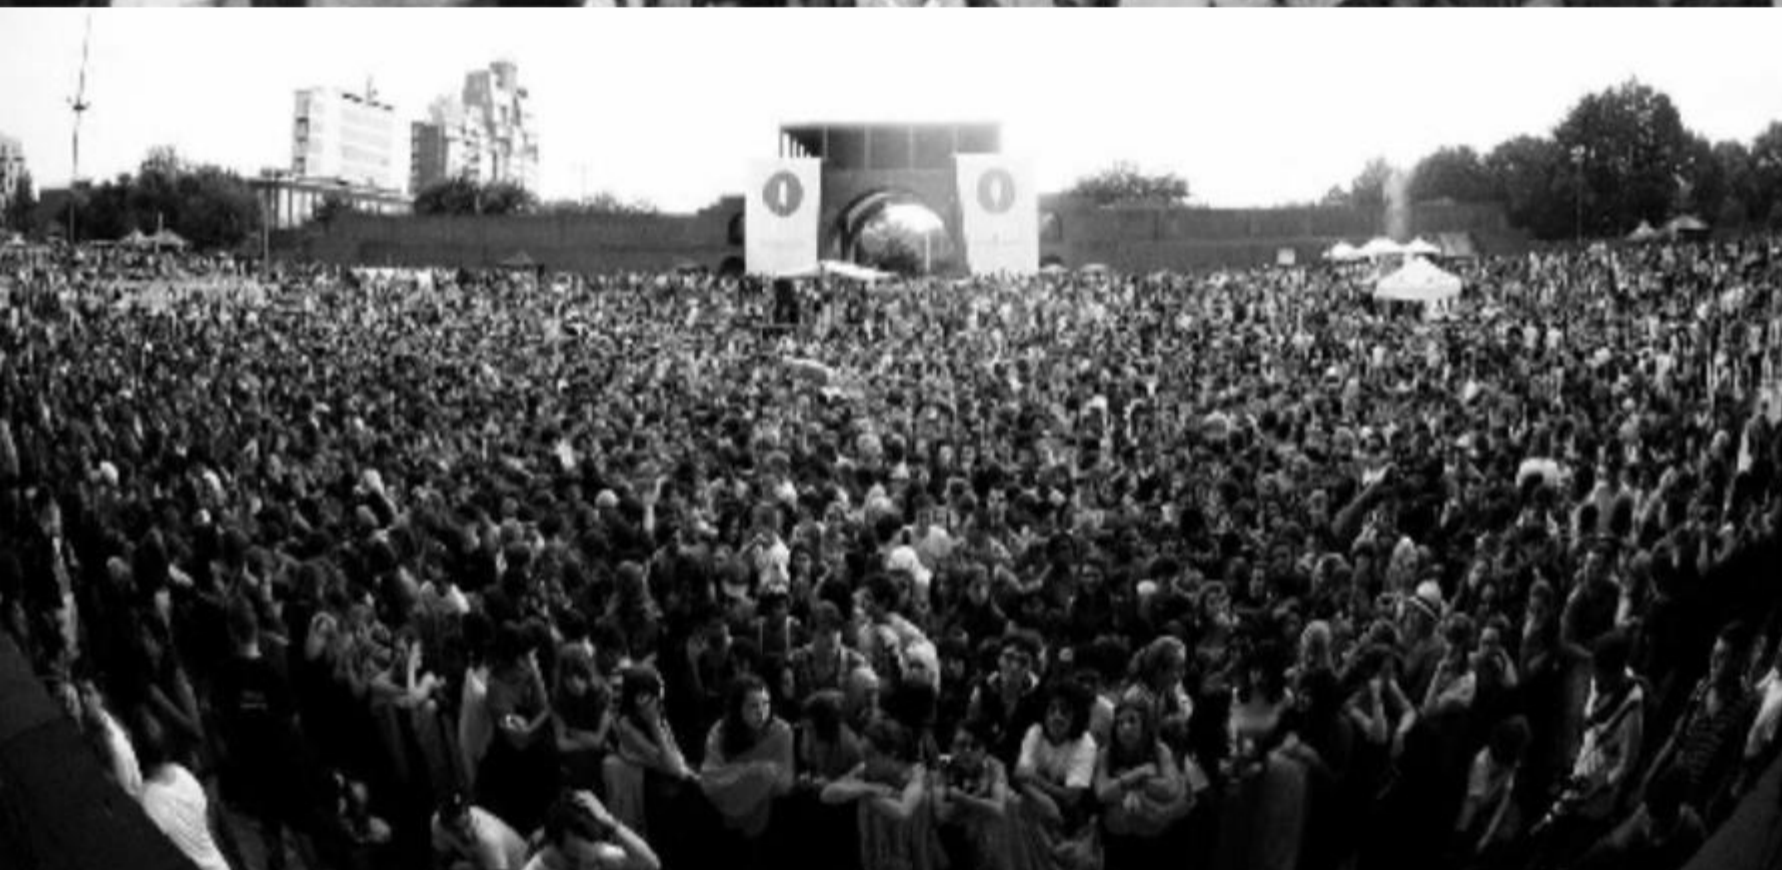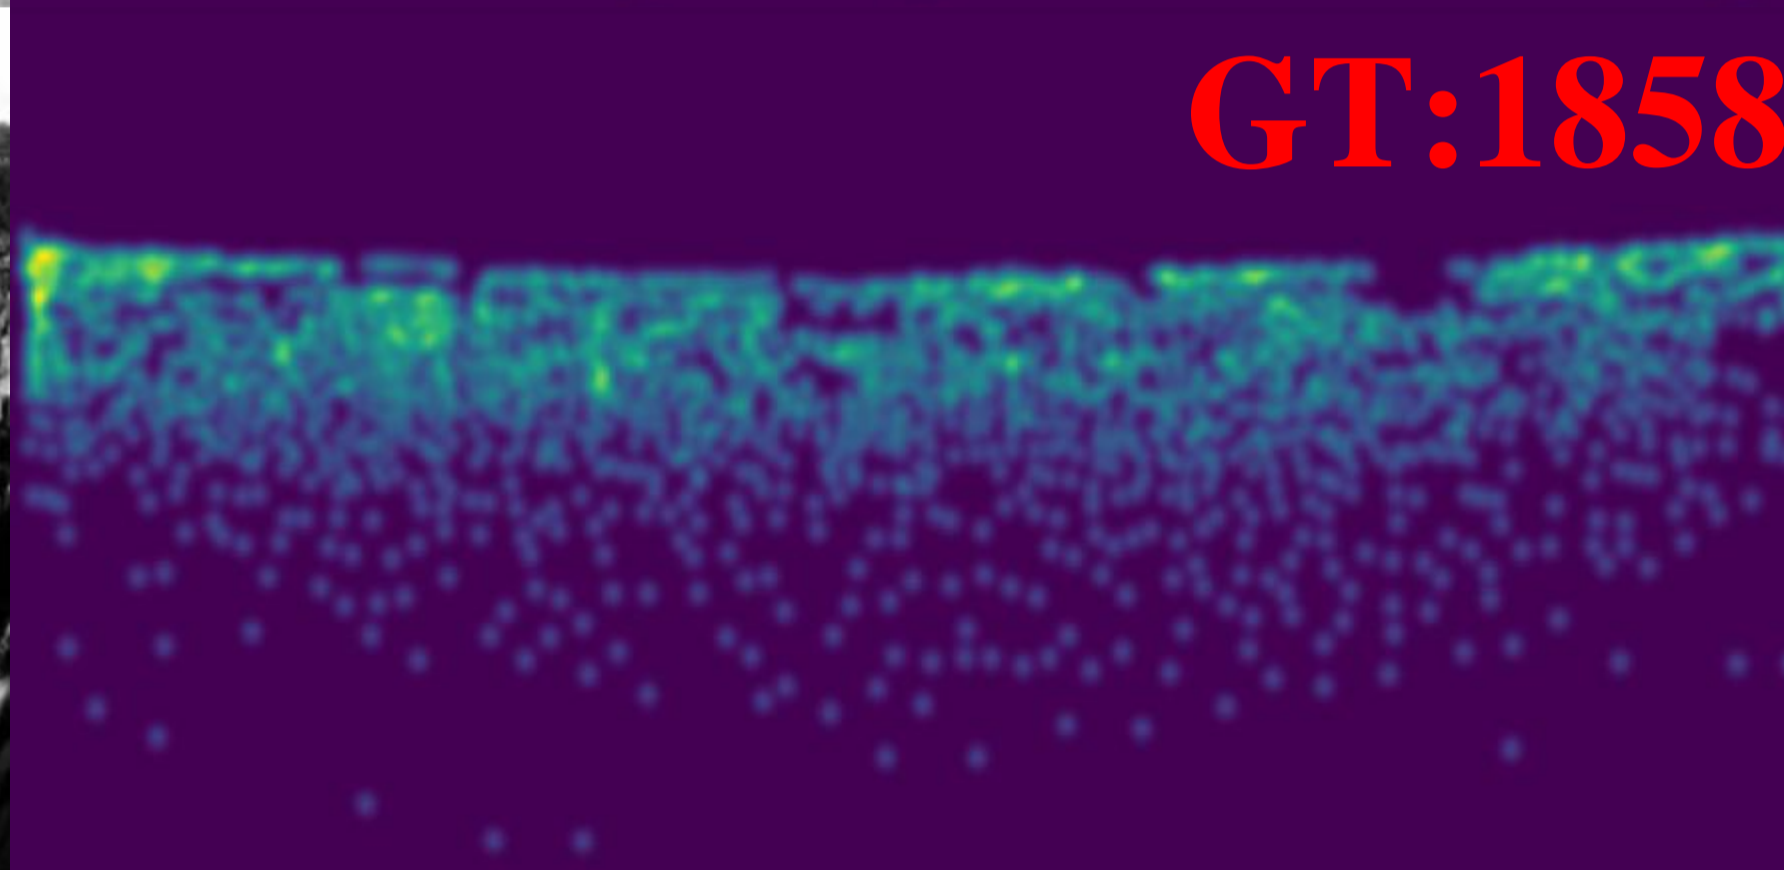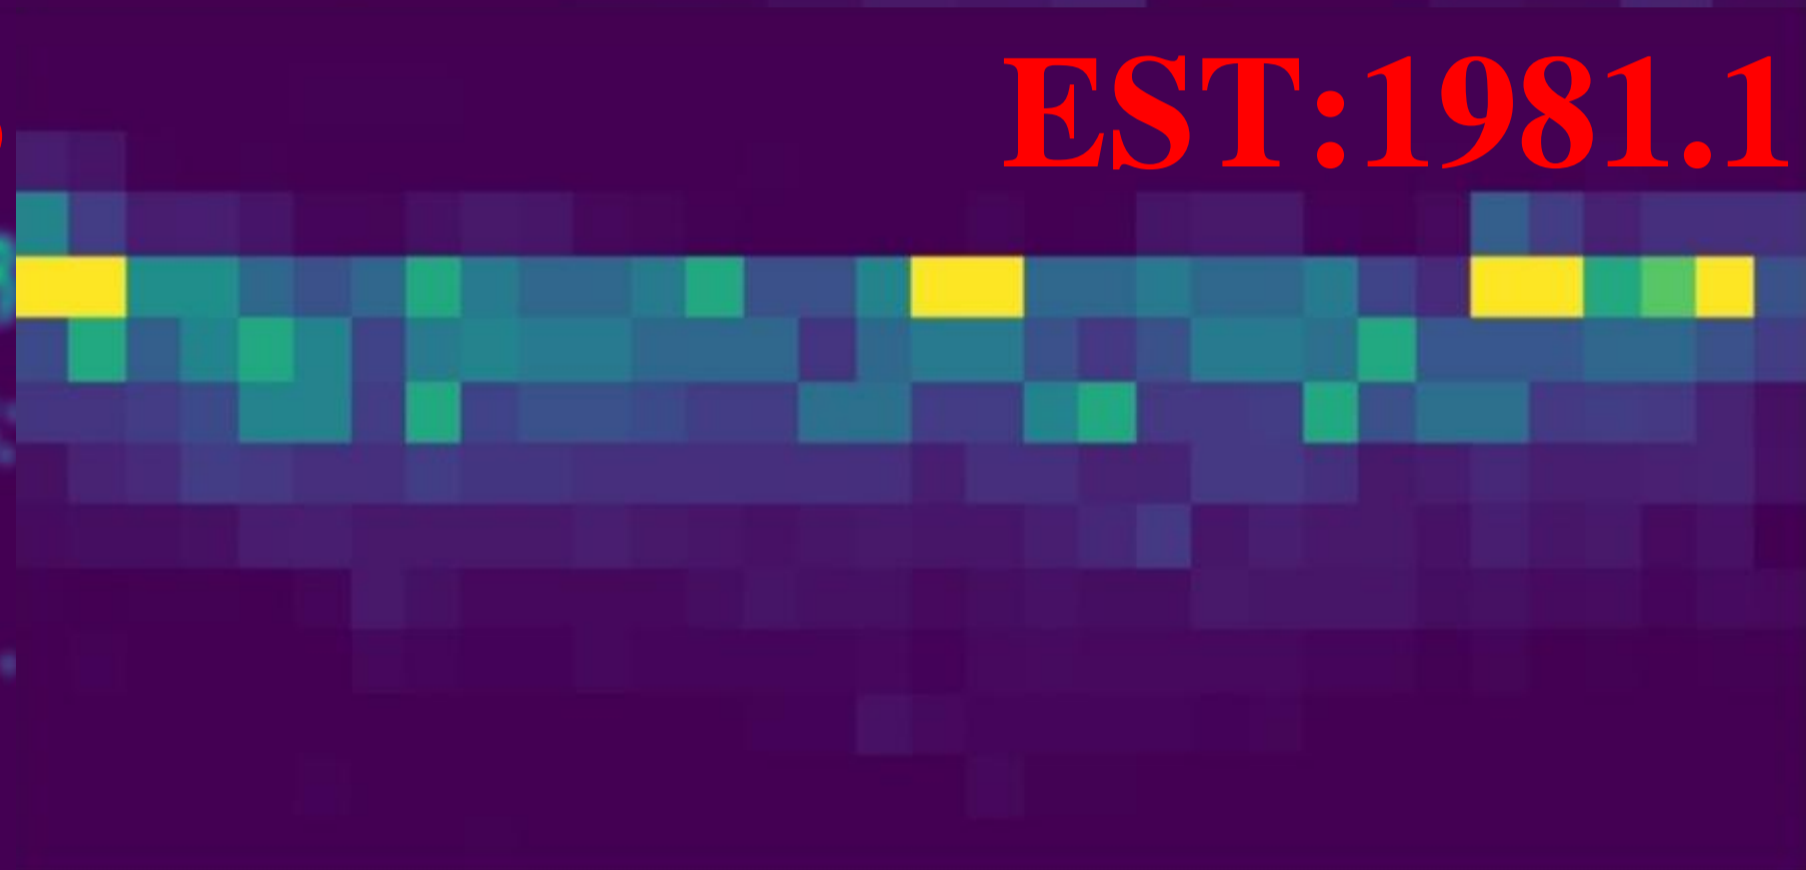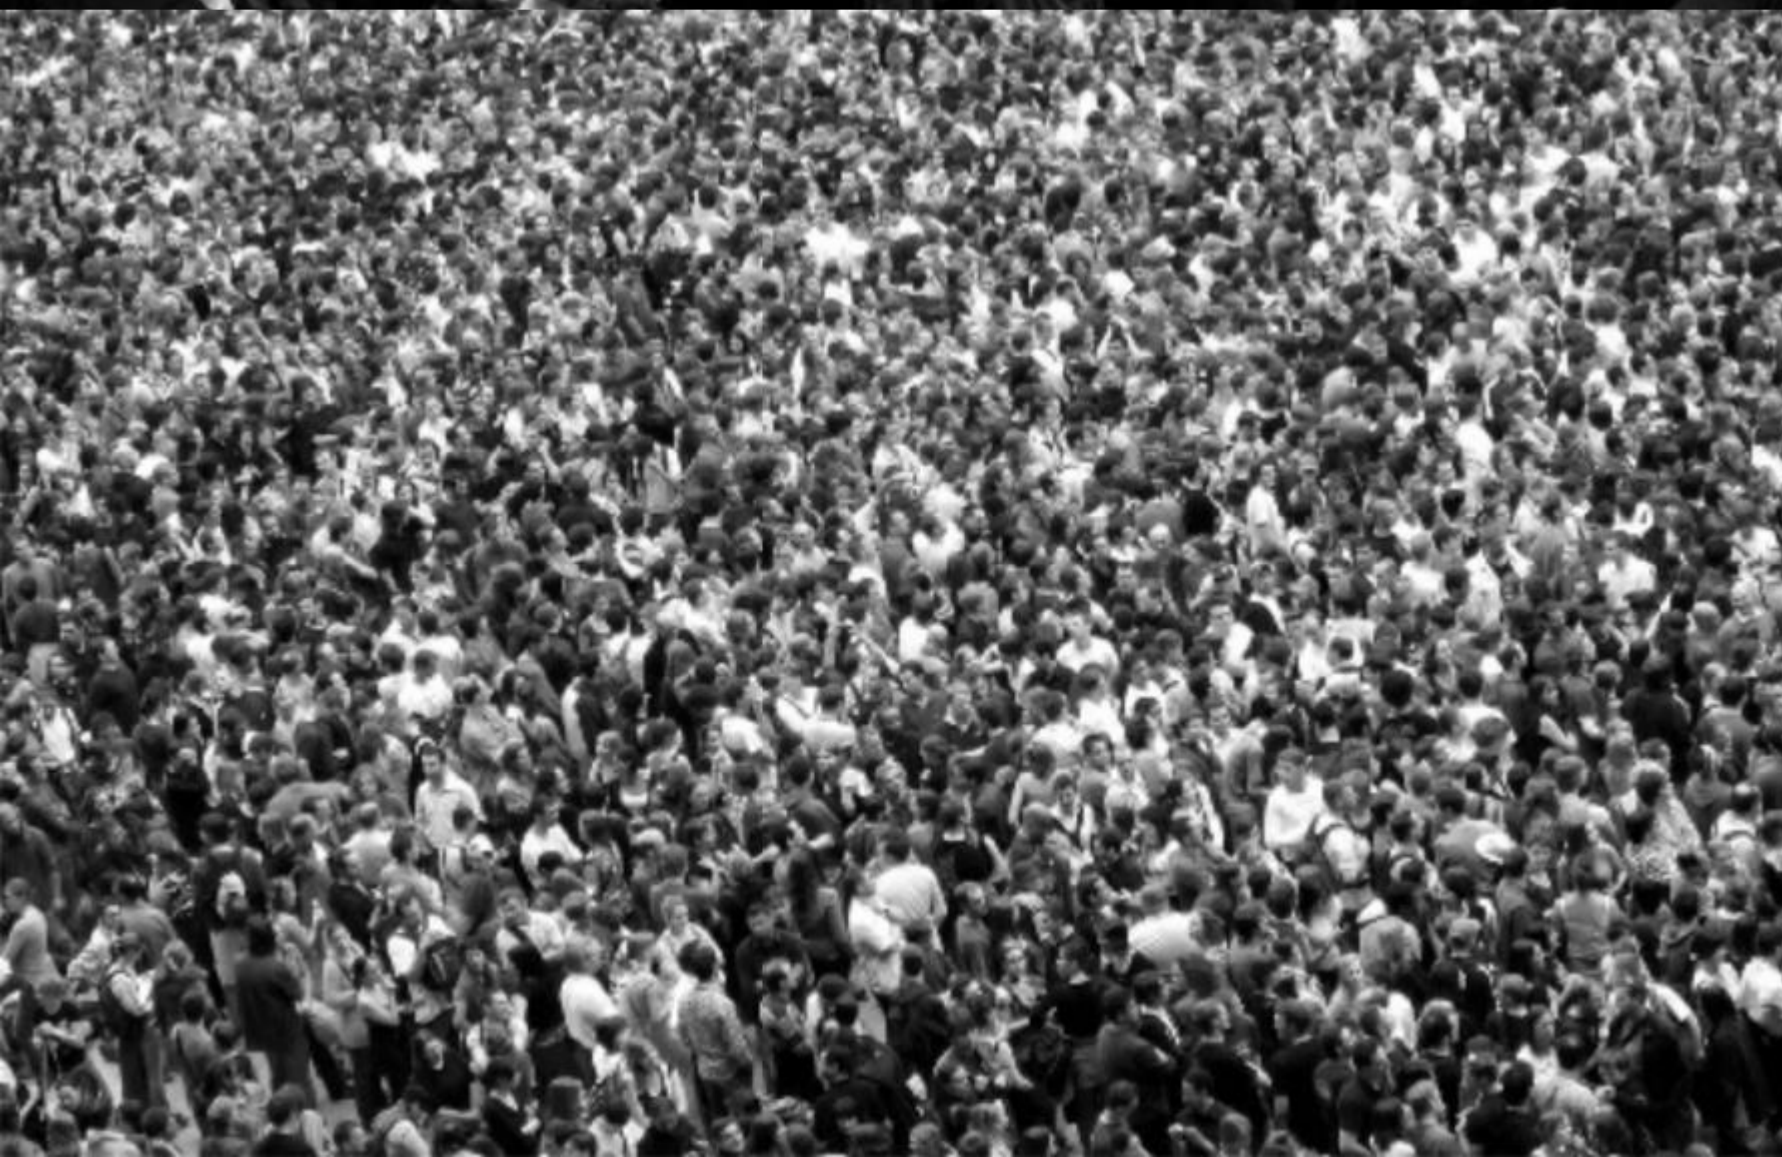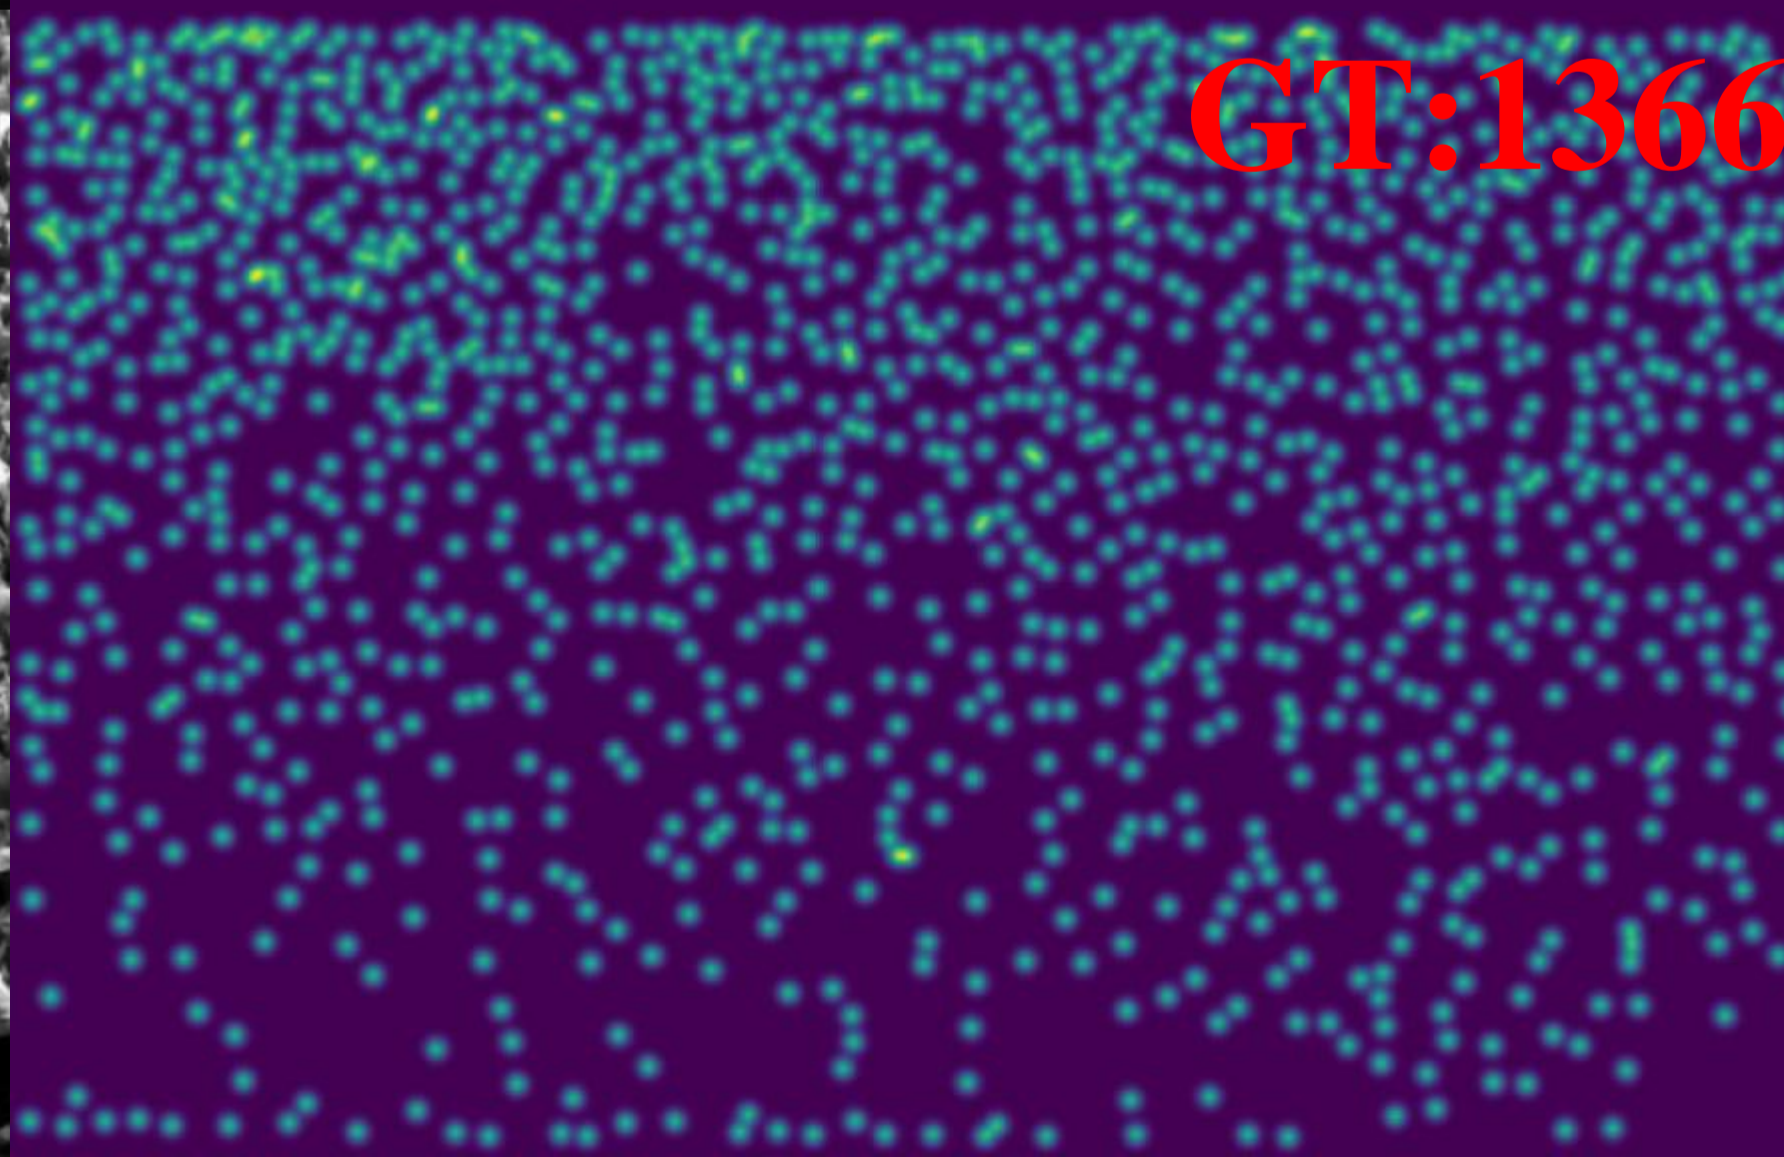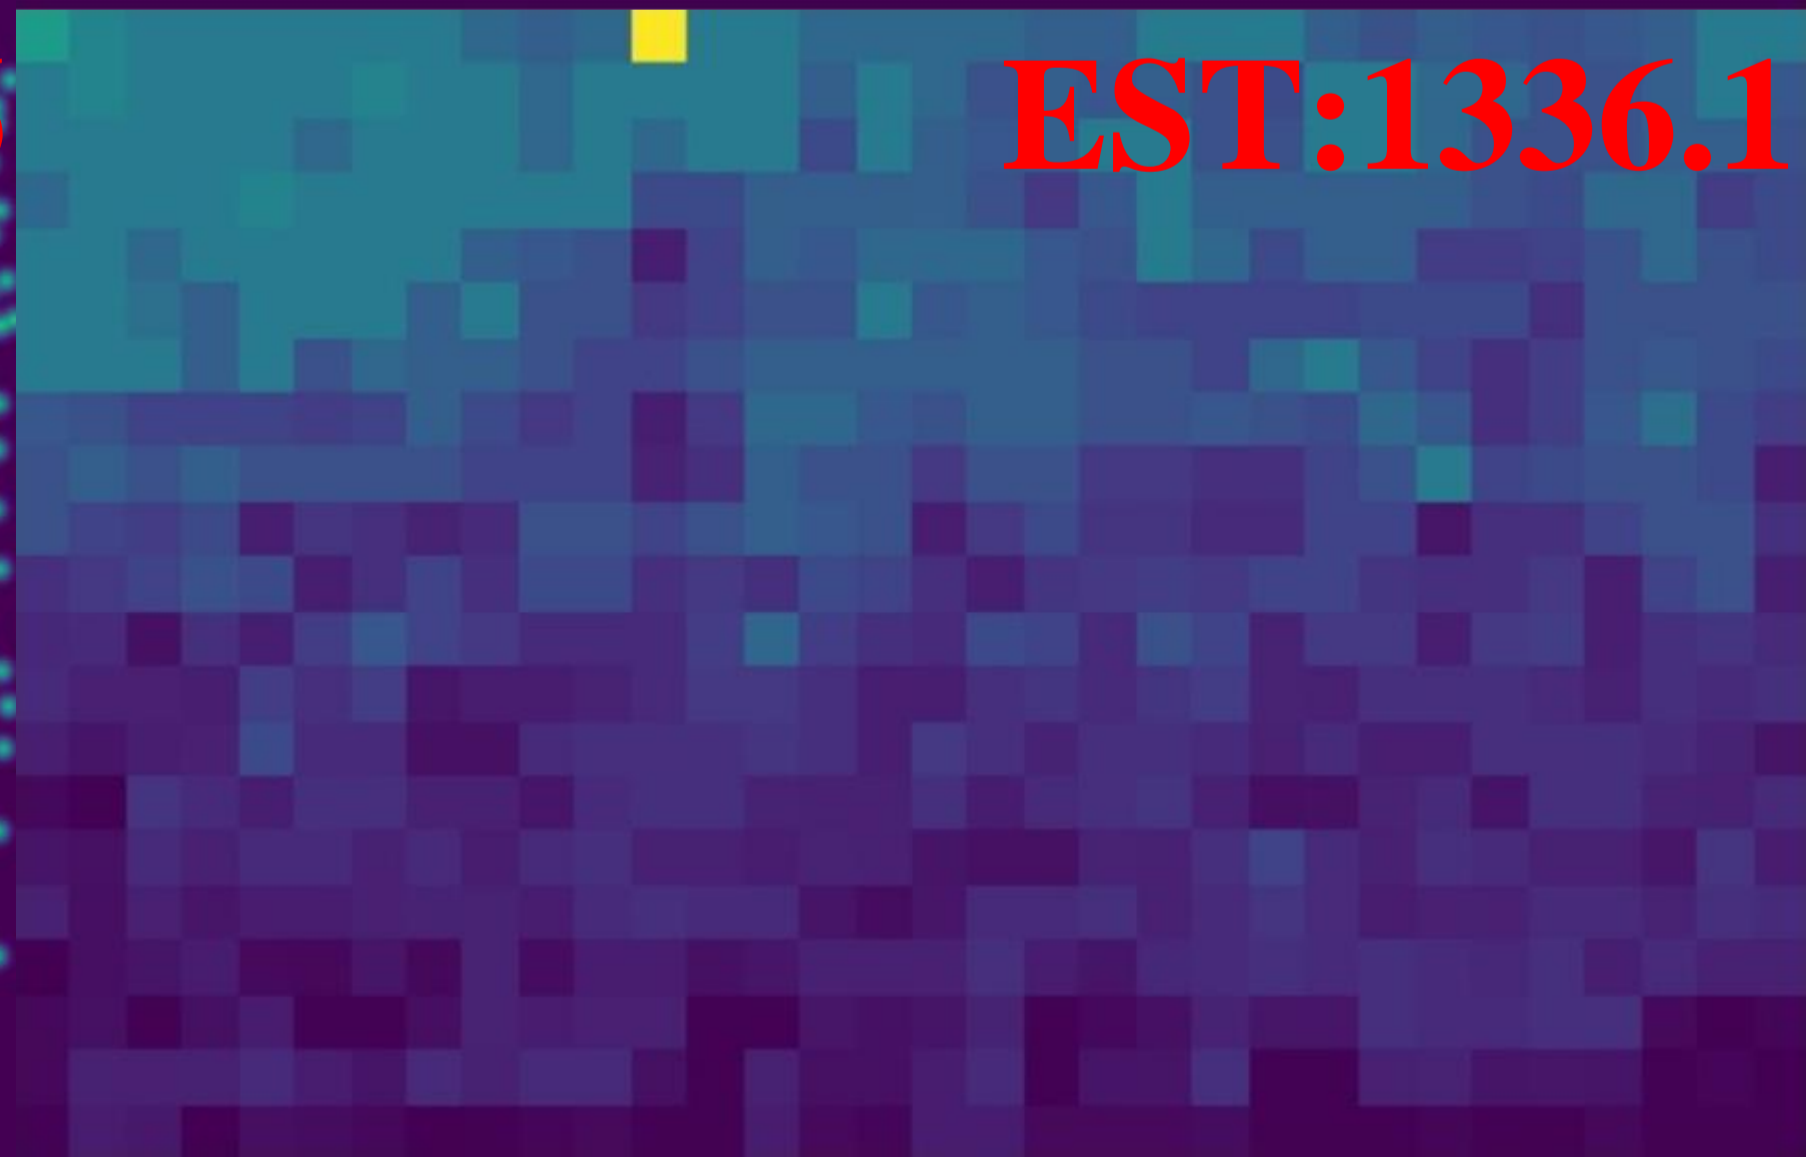

Supplement: Supplementary file 4 [file 123550171-supp.zip]

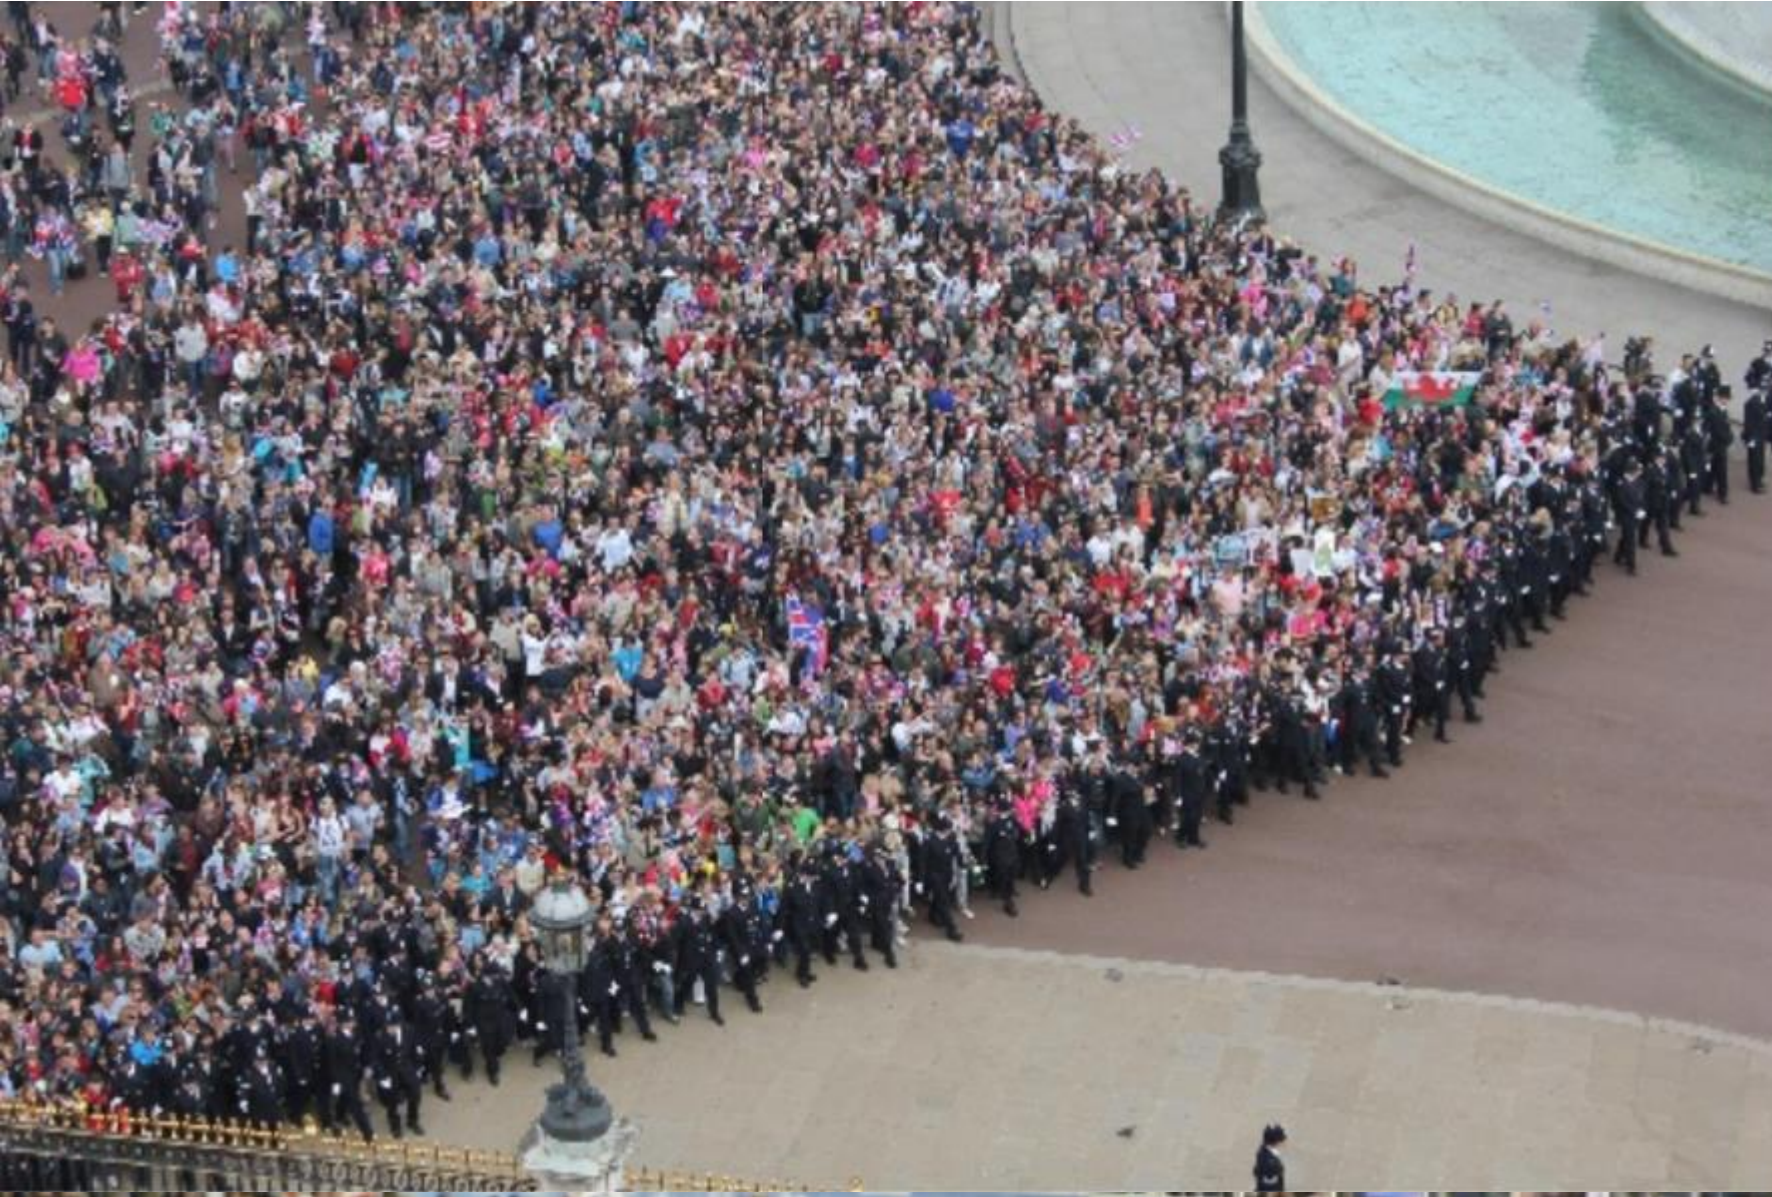

GT:2164

EST:2079.0

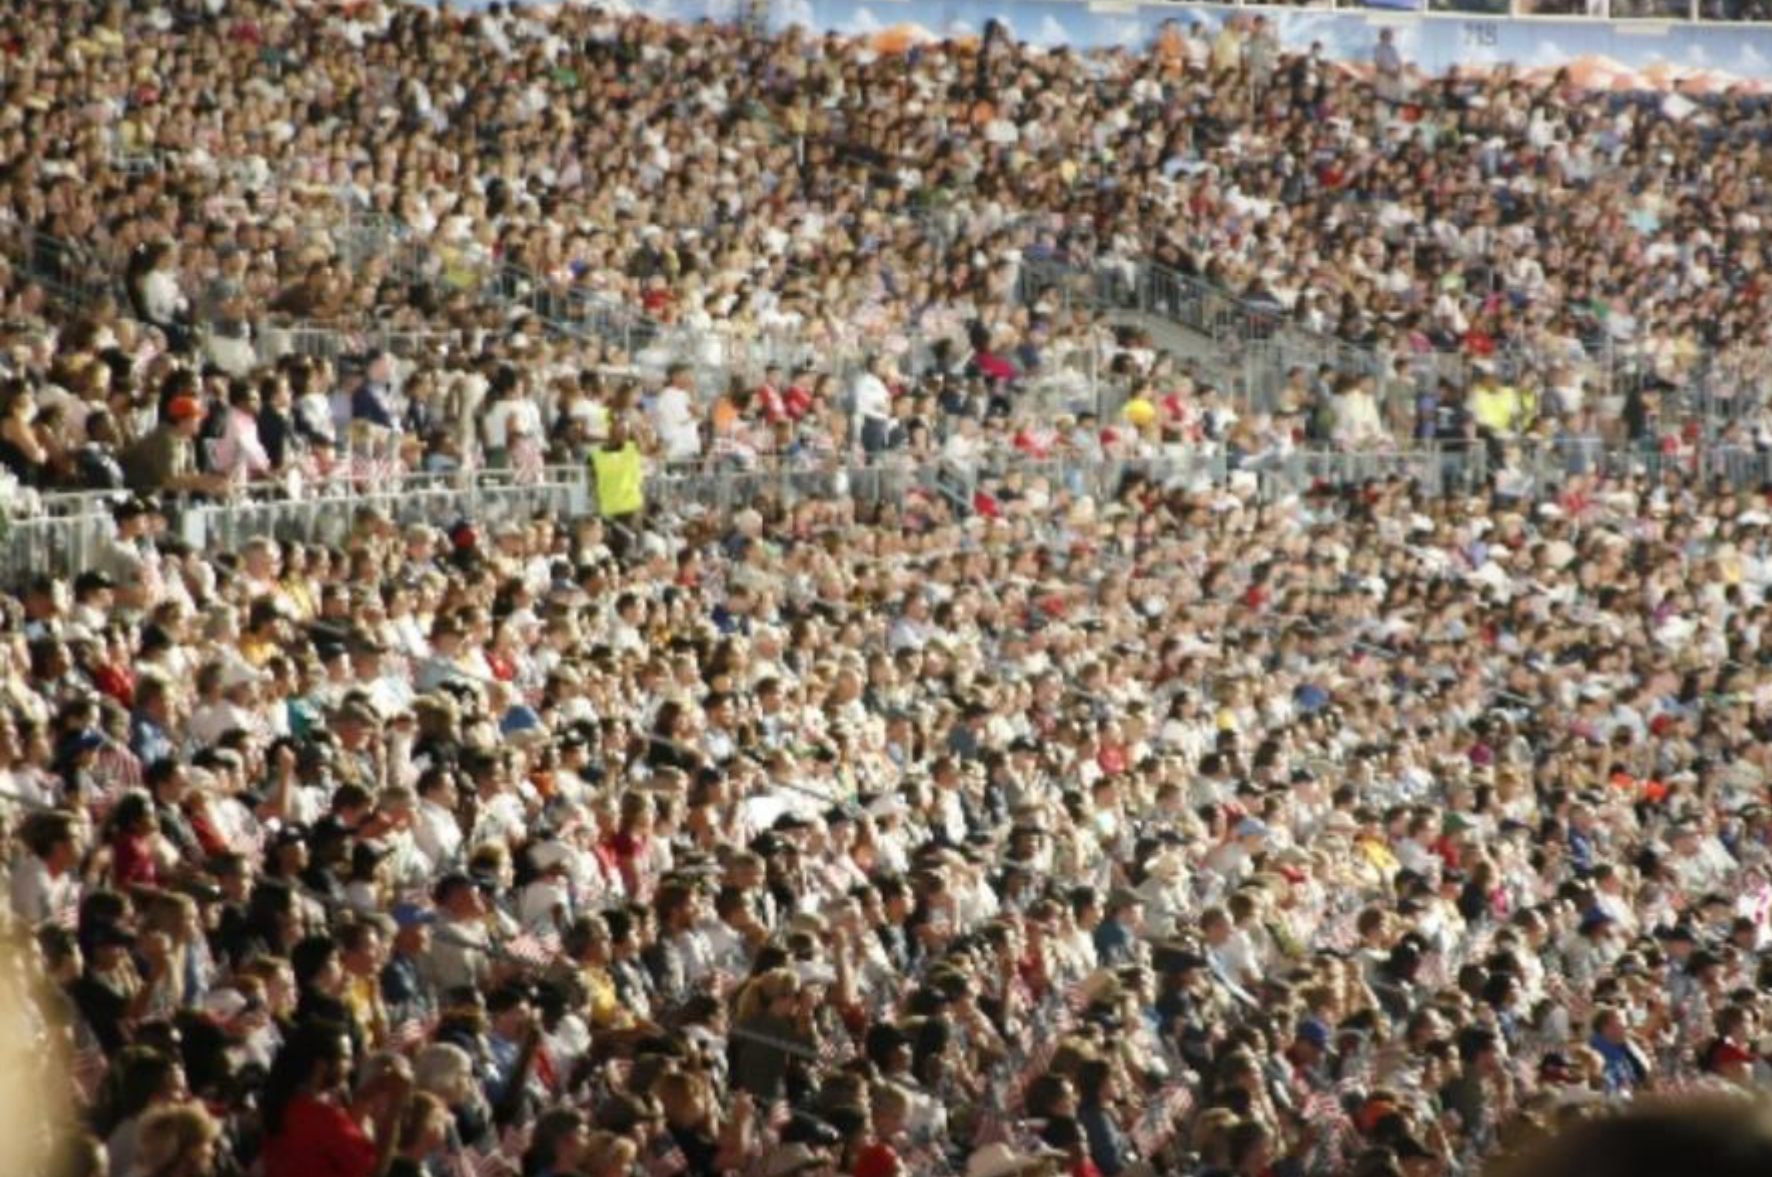

GT:1613

EST:1505.7

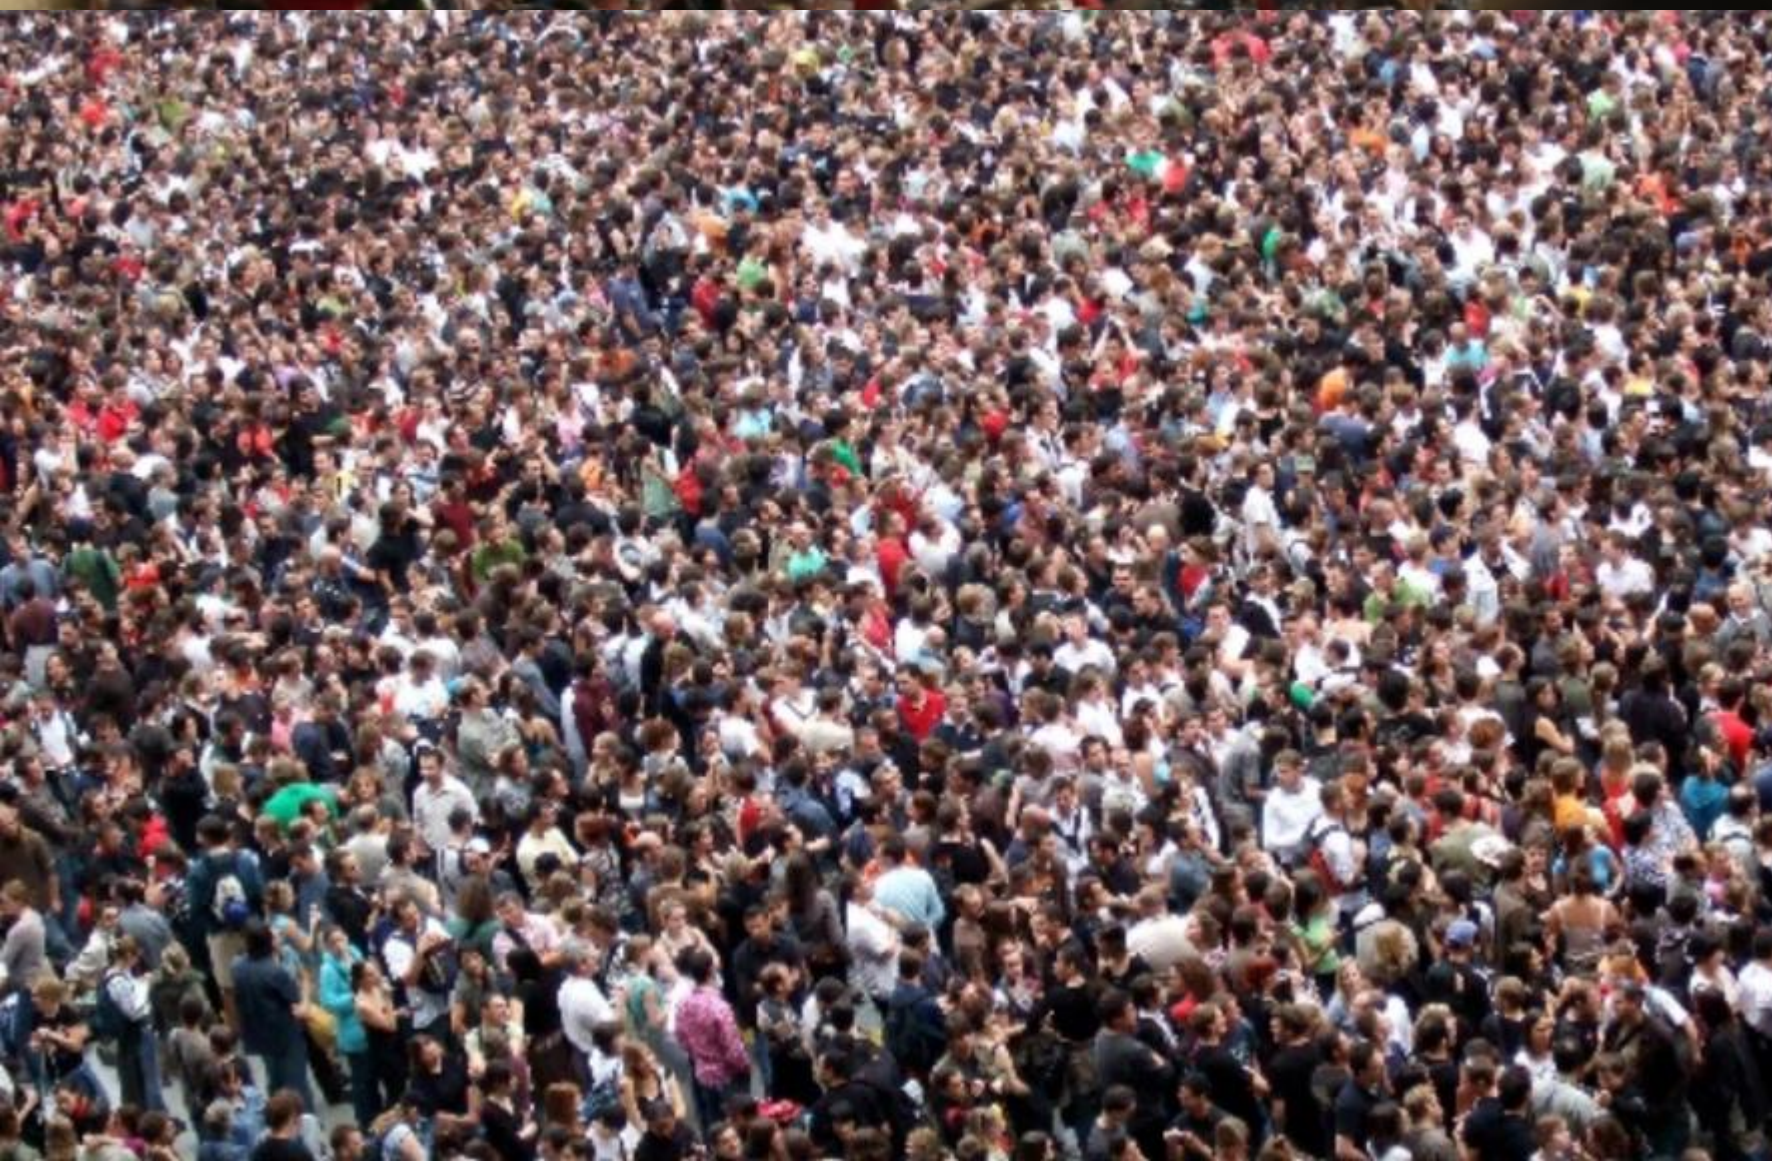

GT:1668

EST:1578.4

Supplement: Supplementary file 5 [file 123550171-supp.zip]

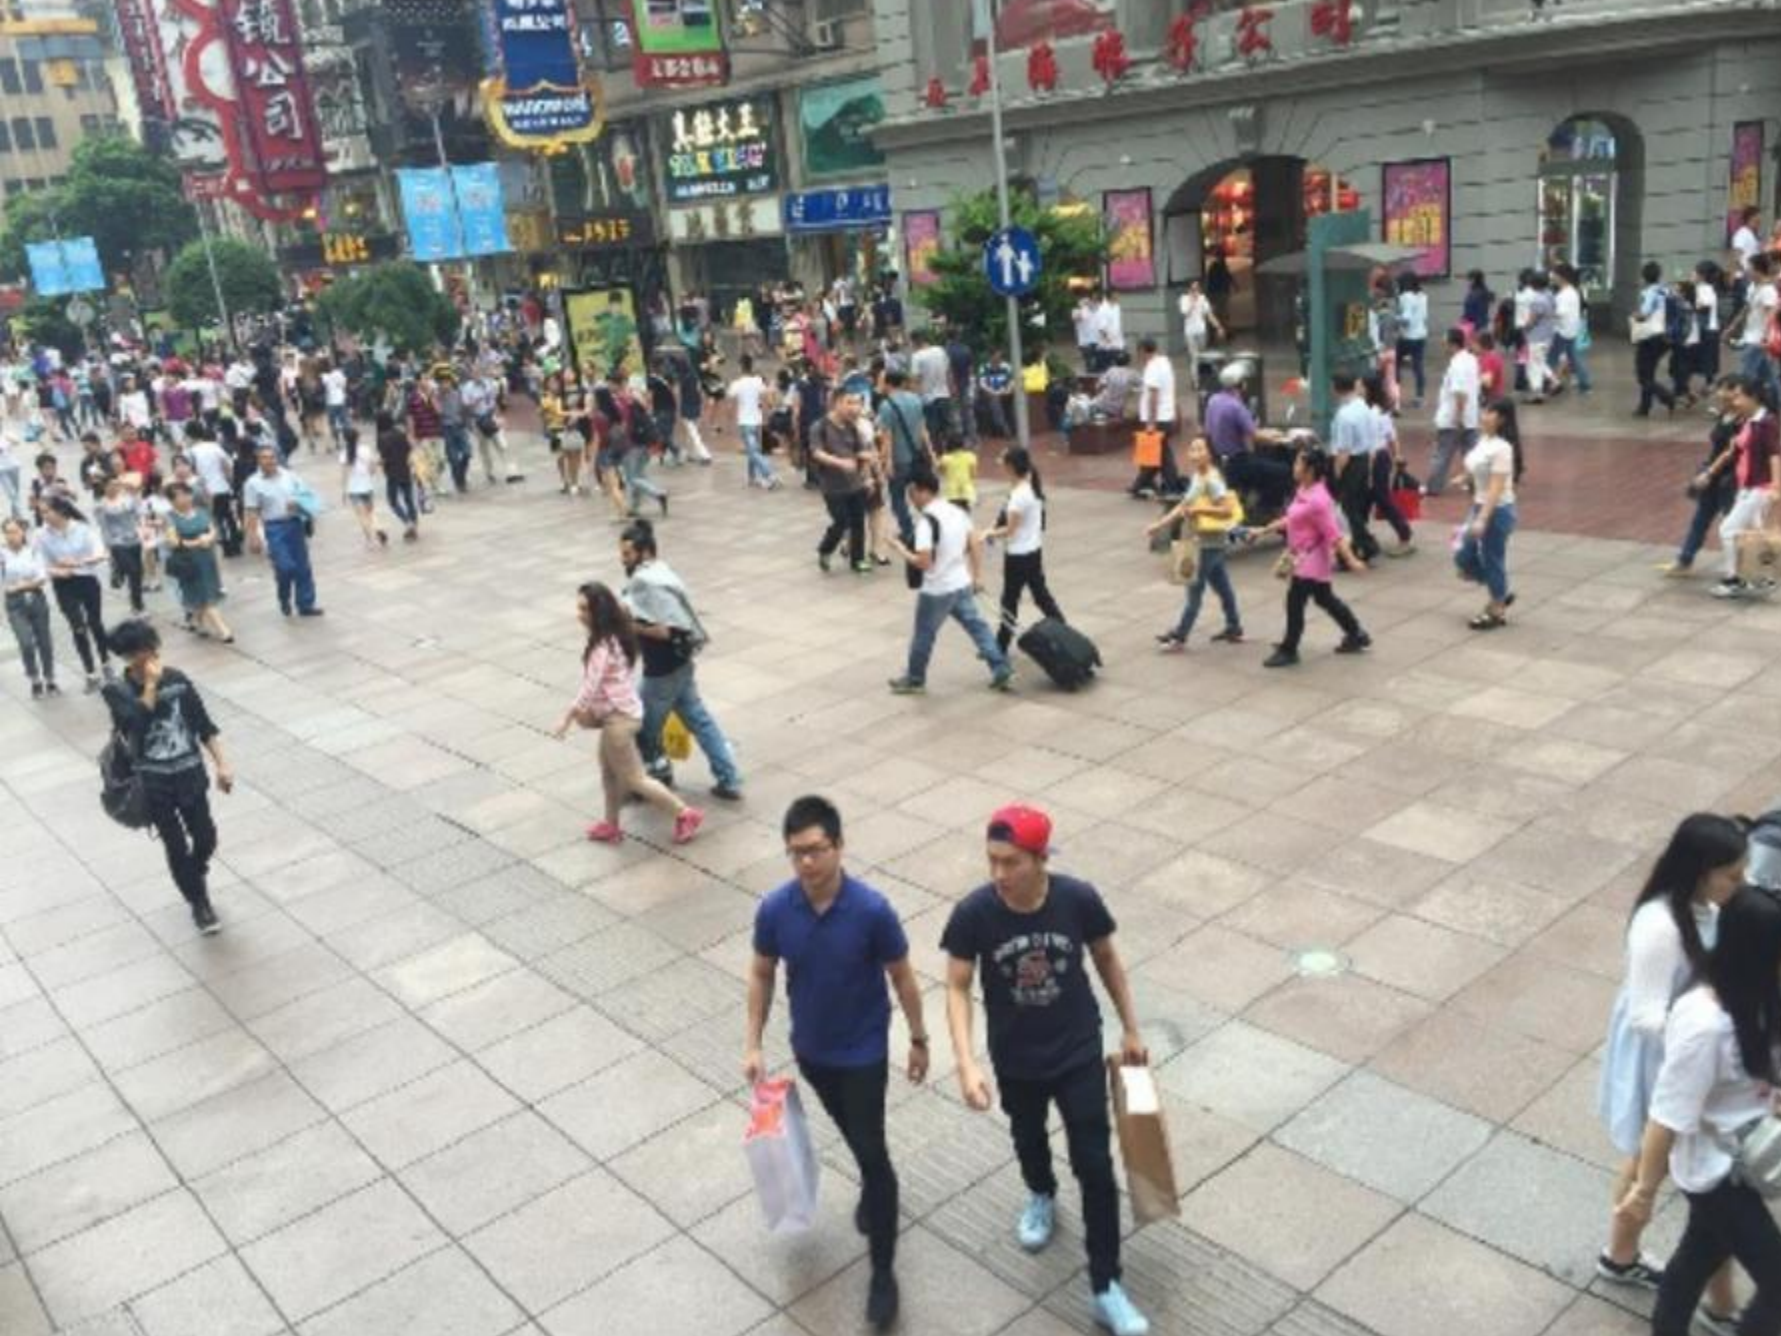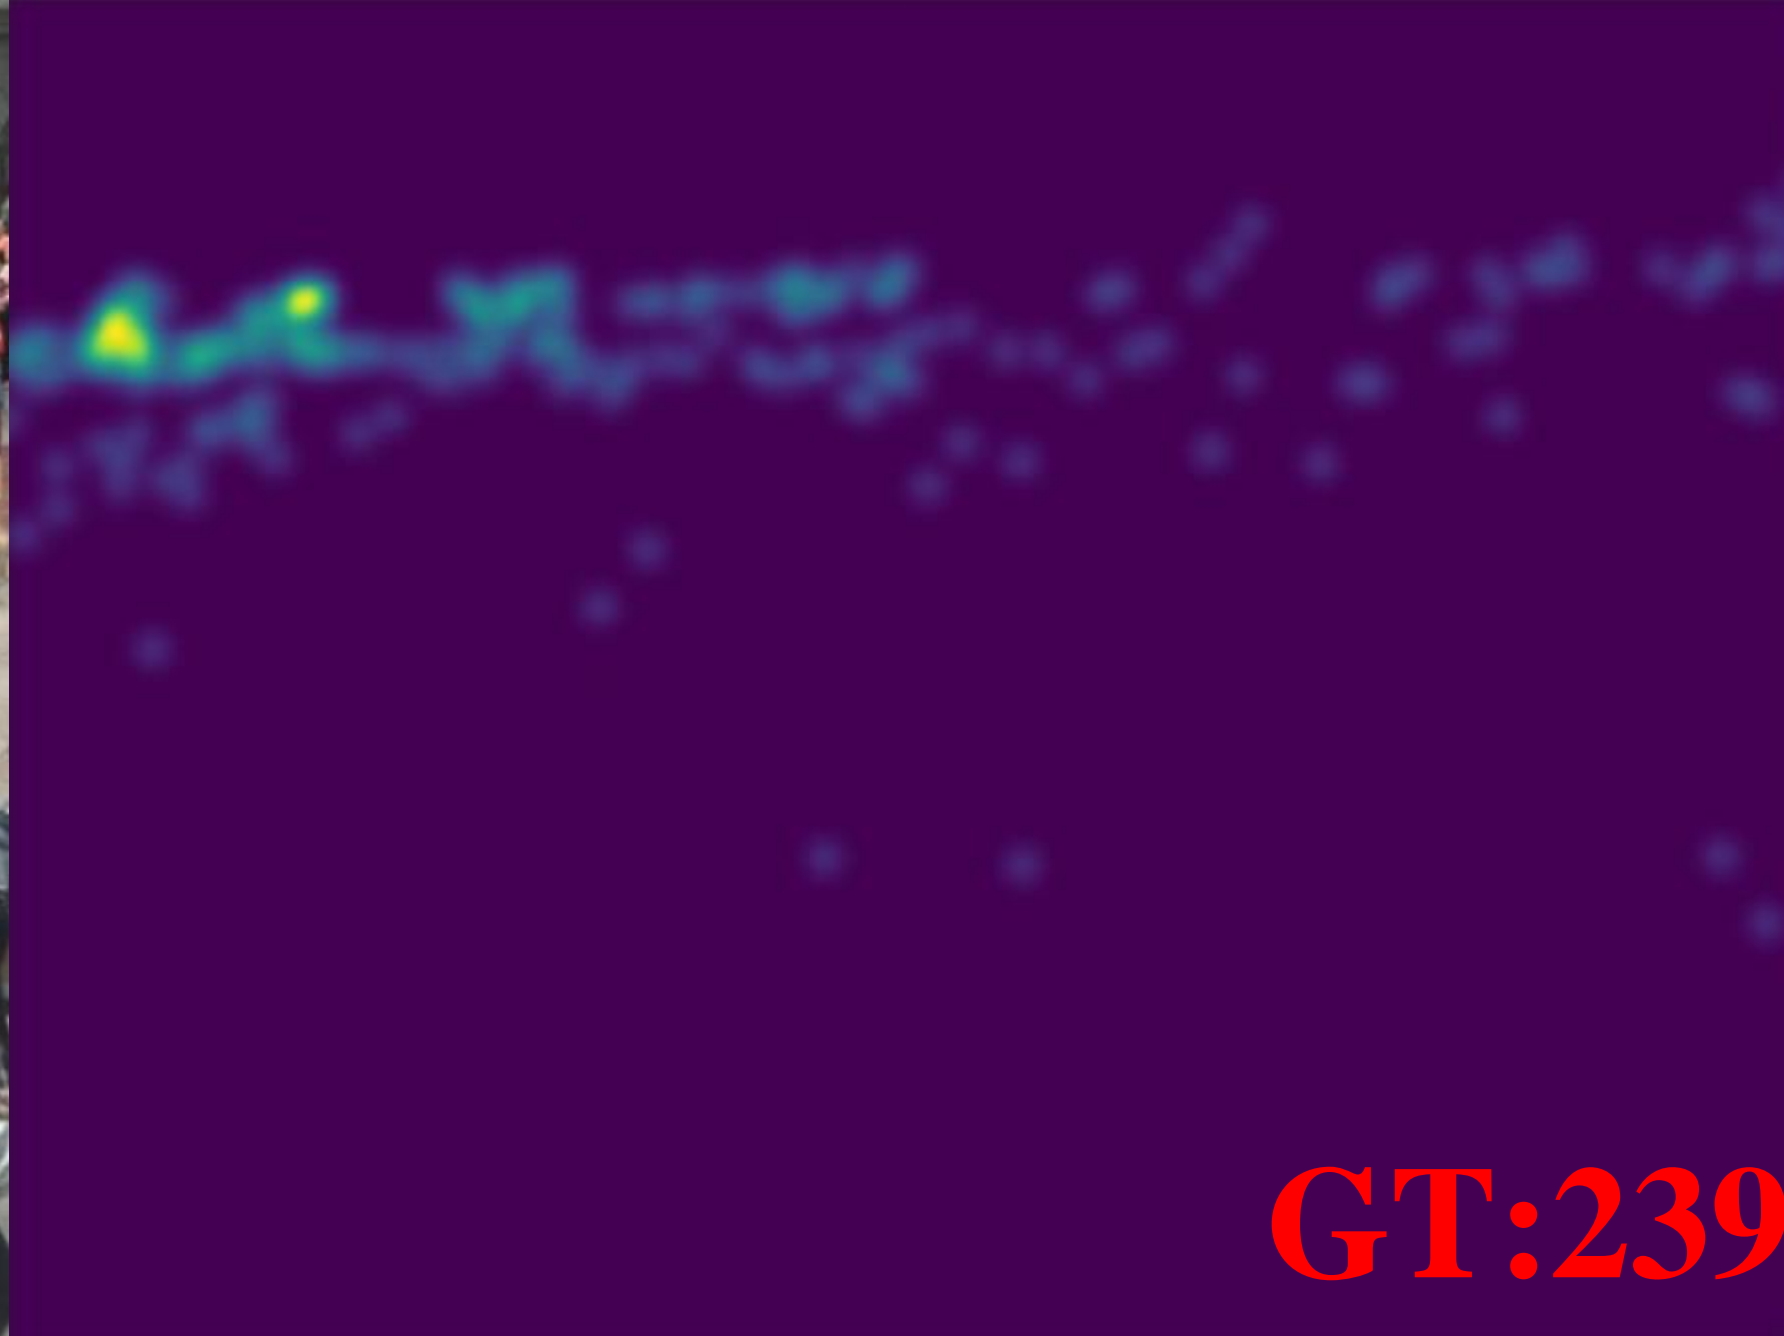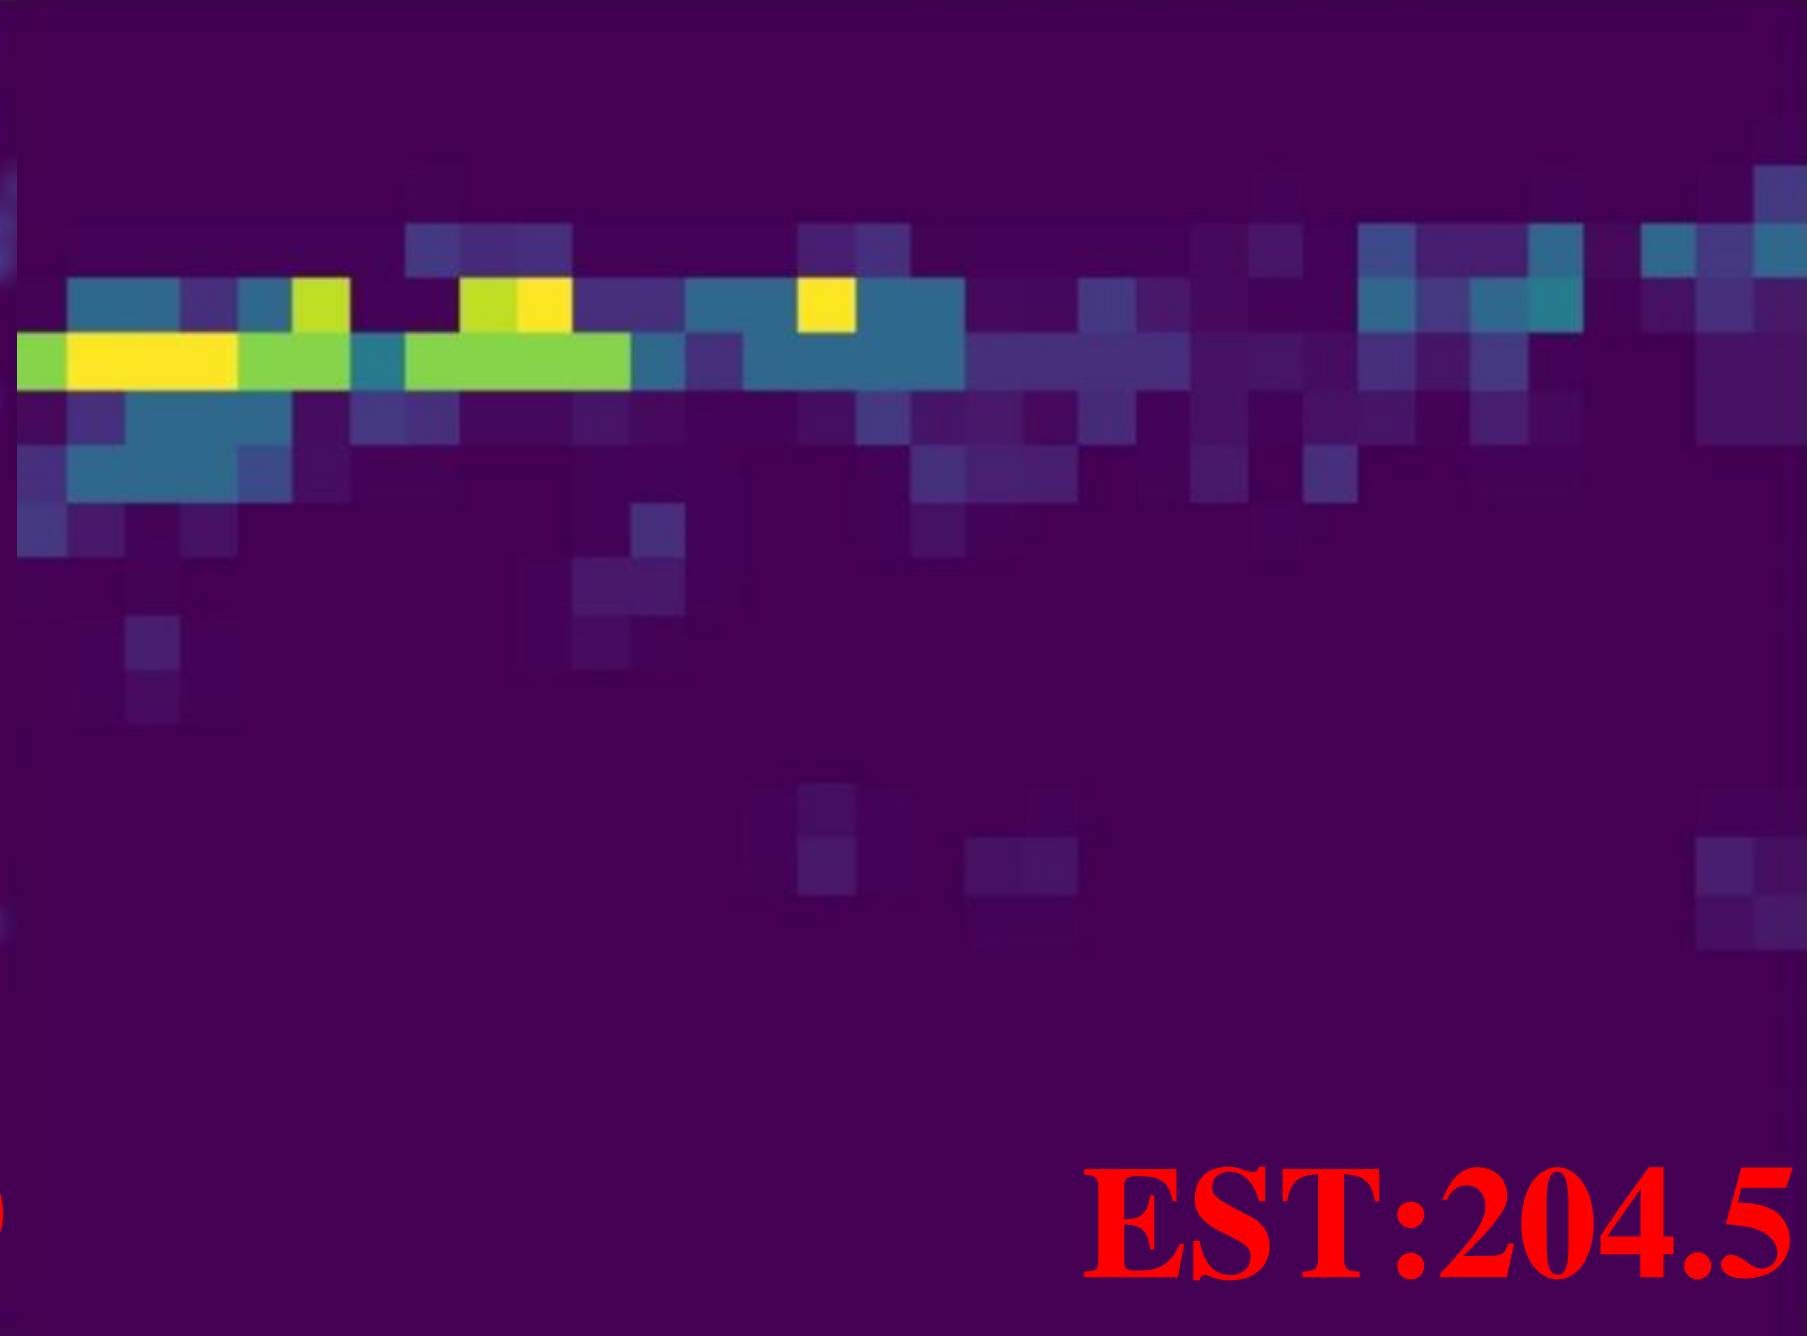

GT:239

EST:204.5

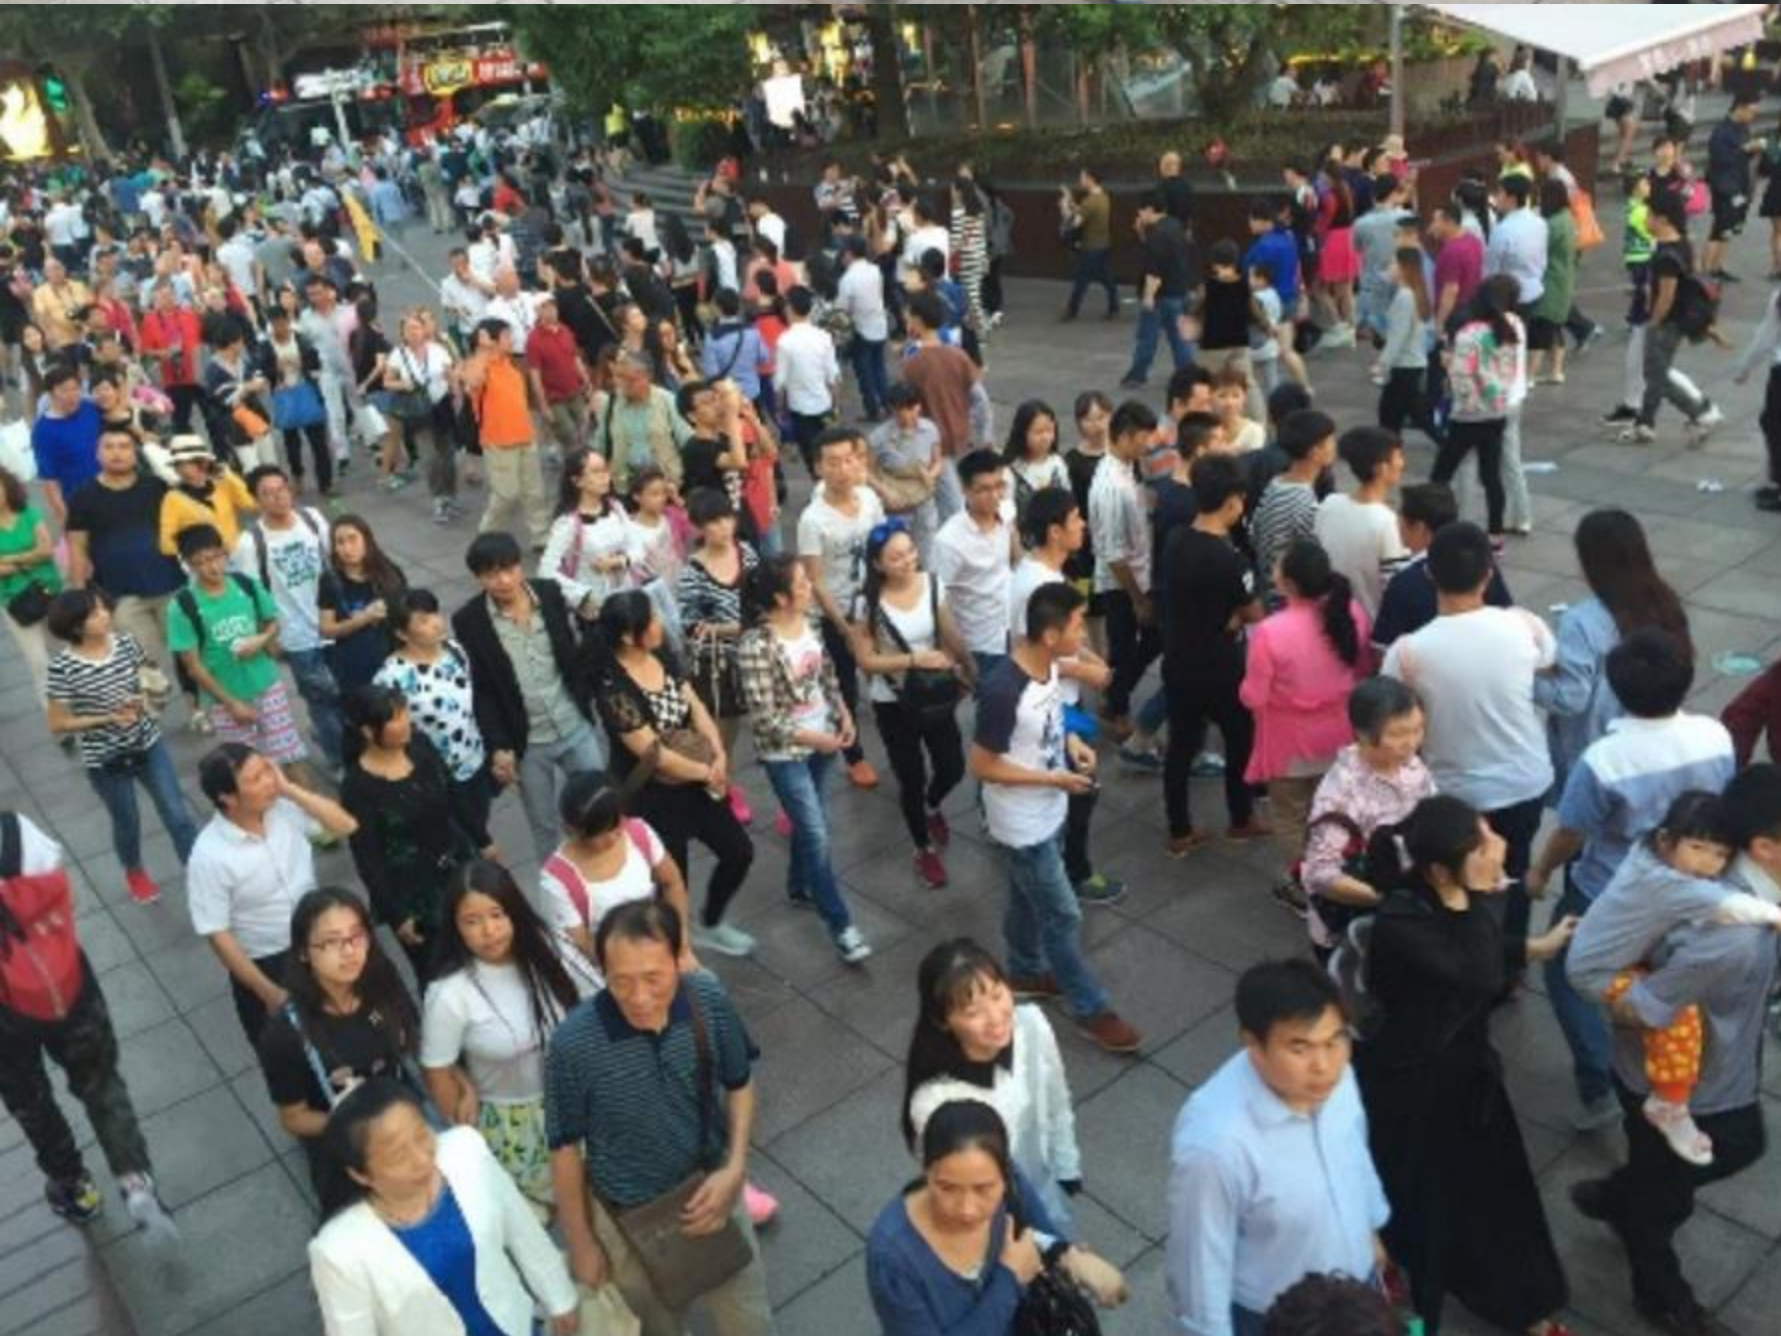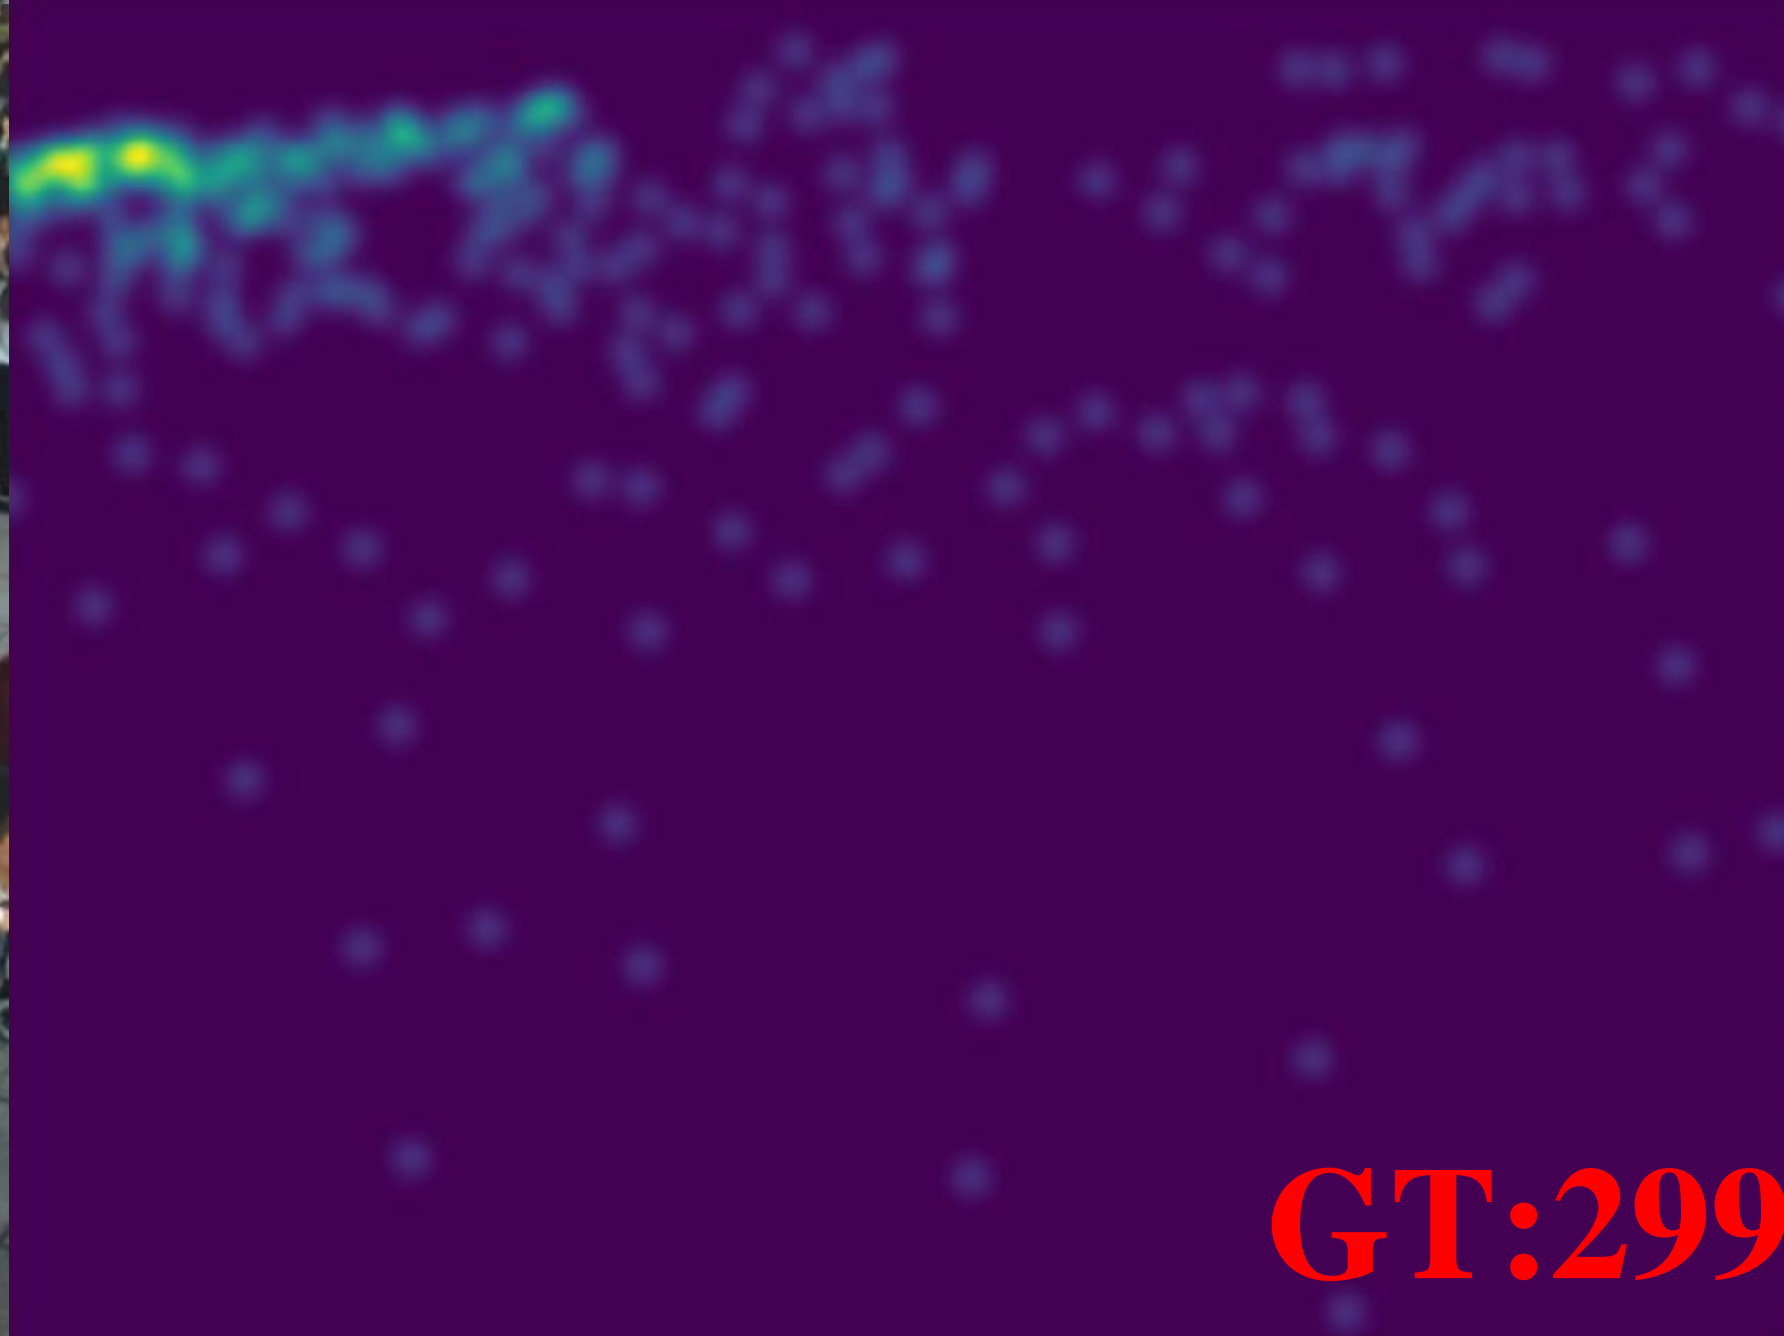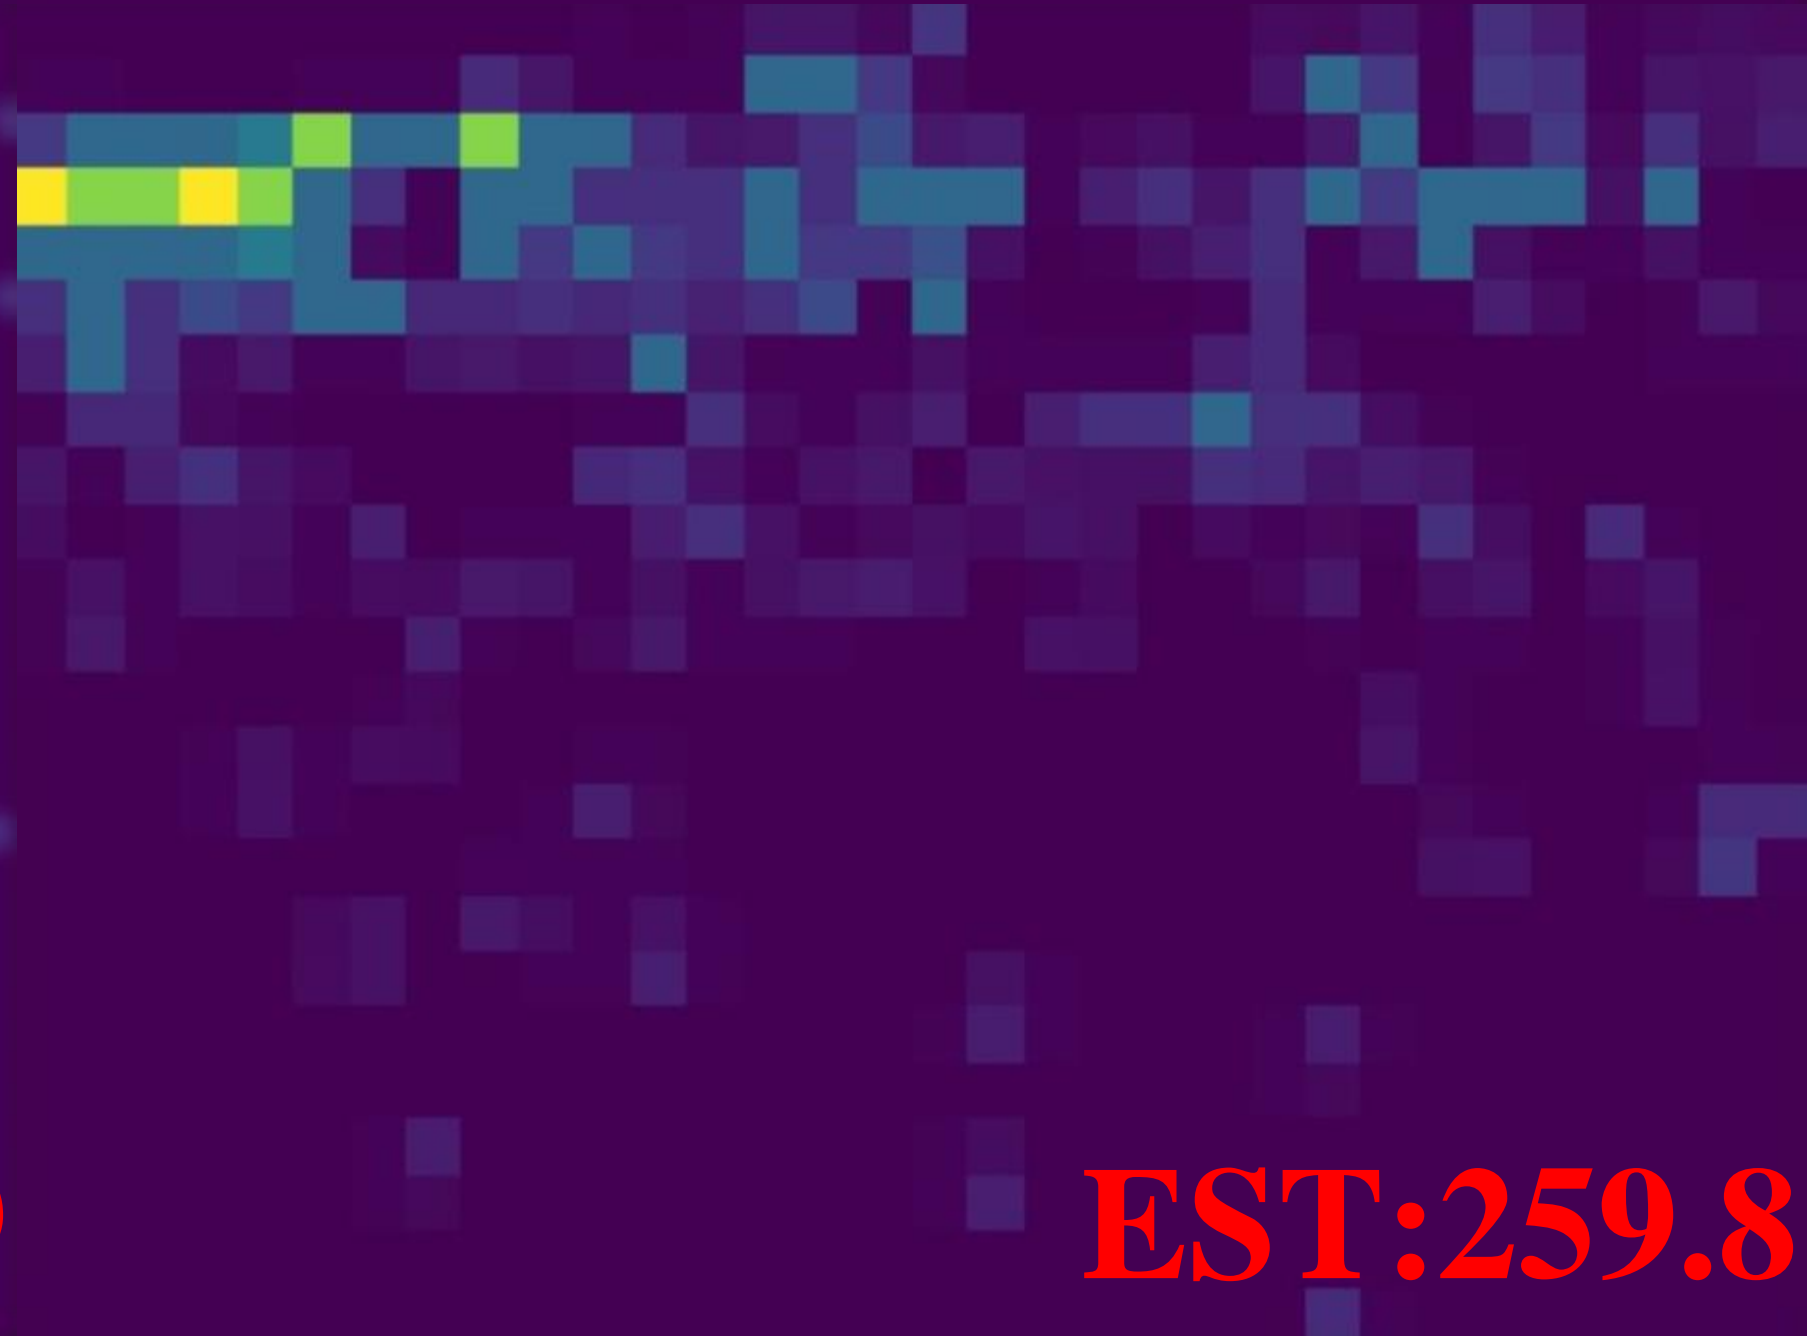

GT:299

EST:259.8

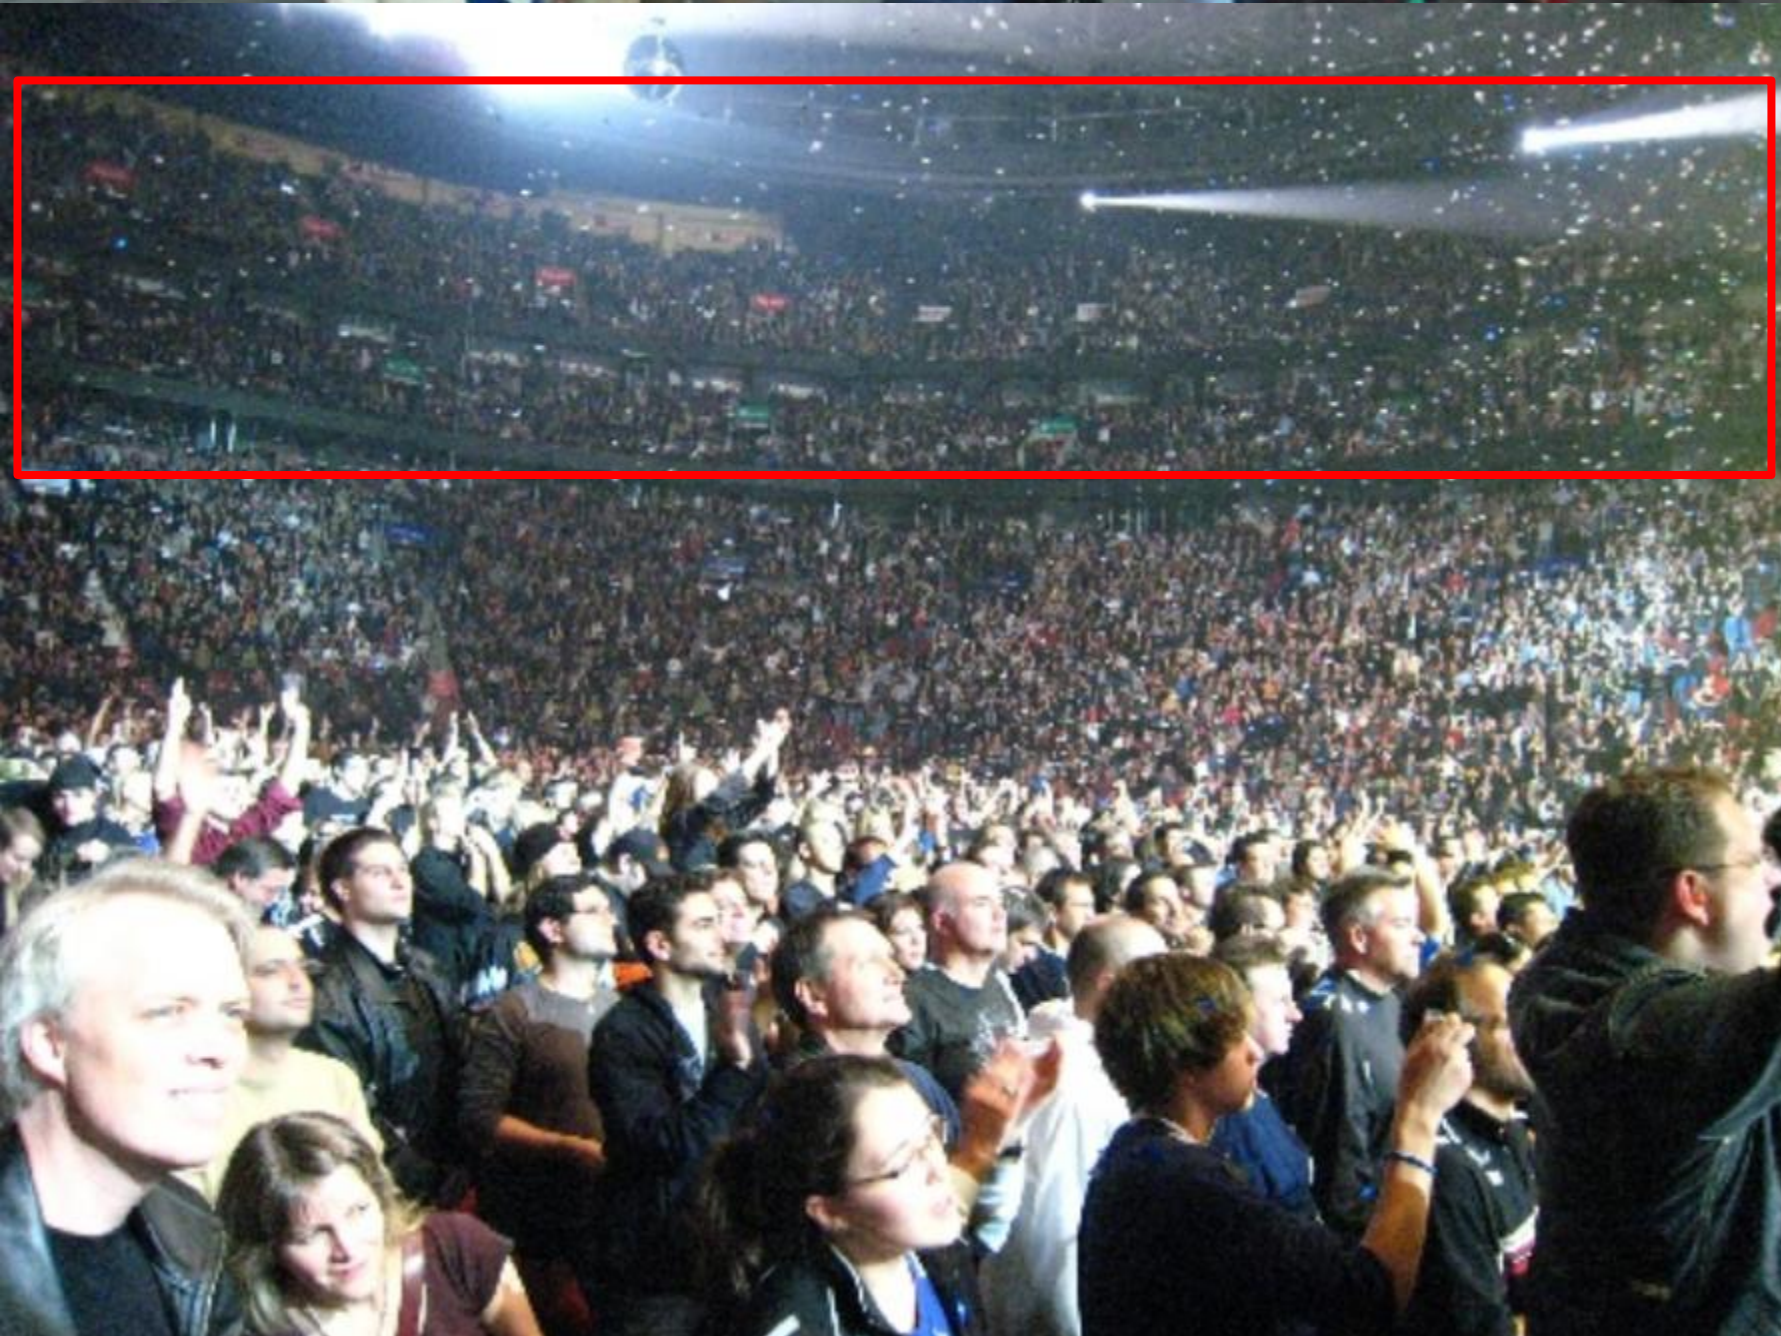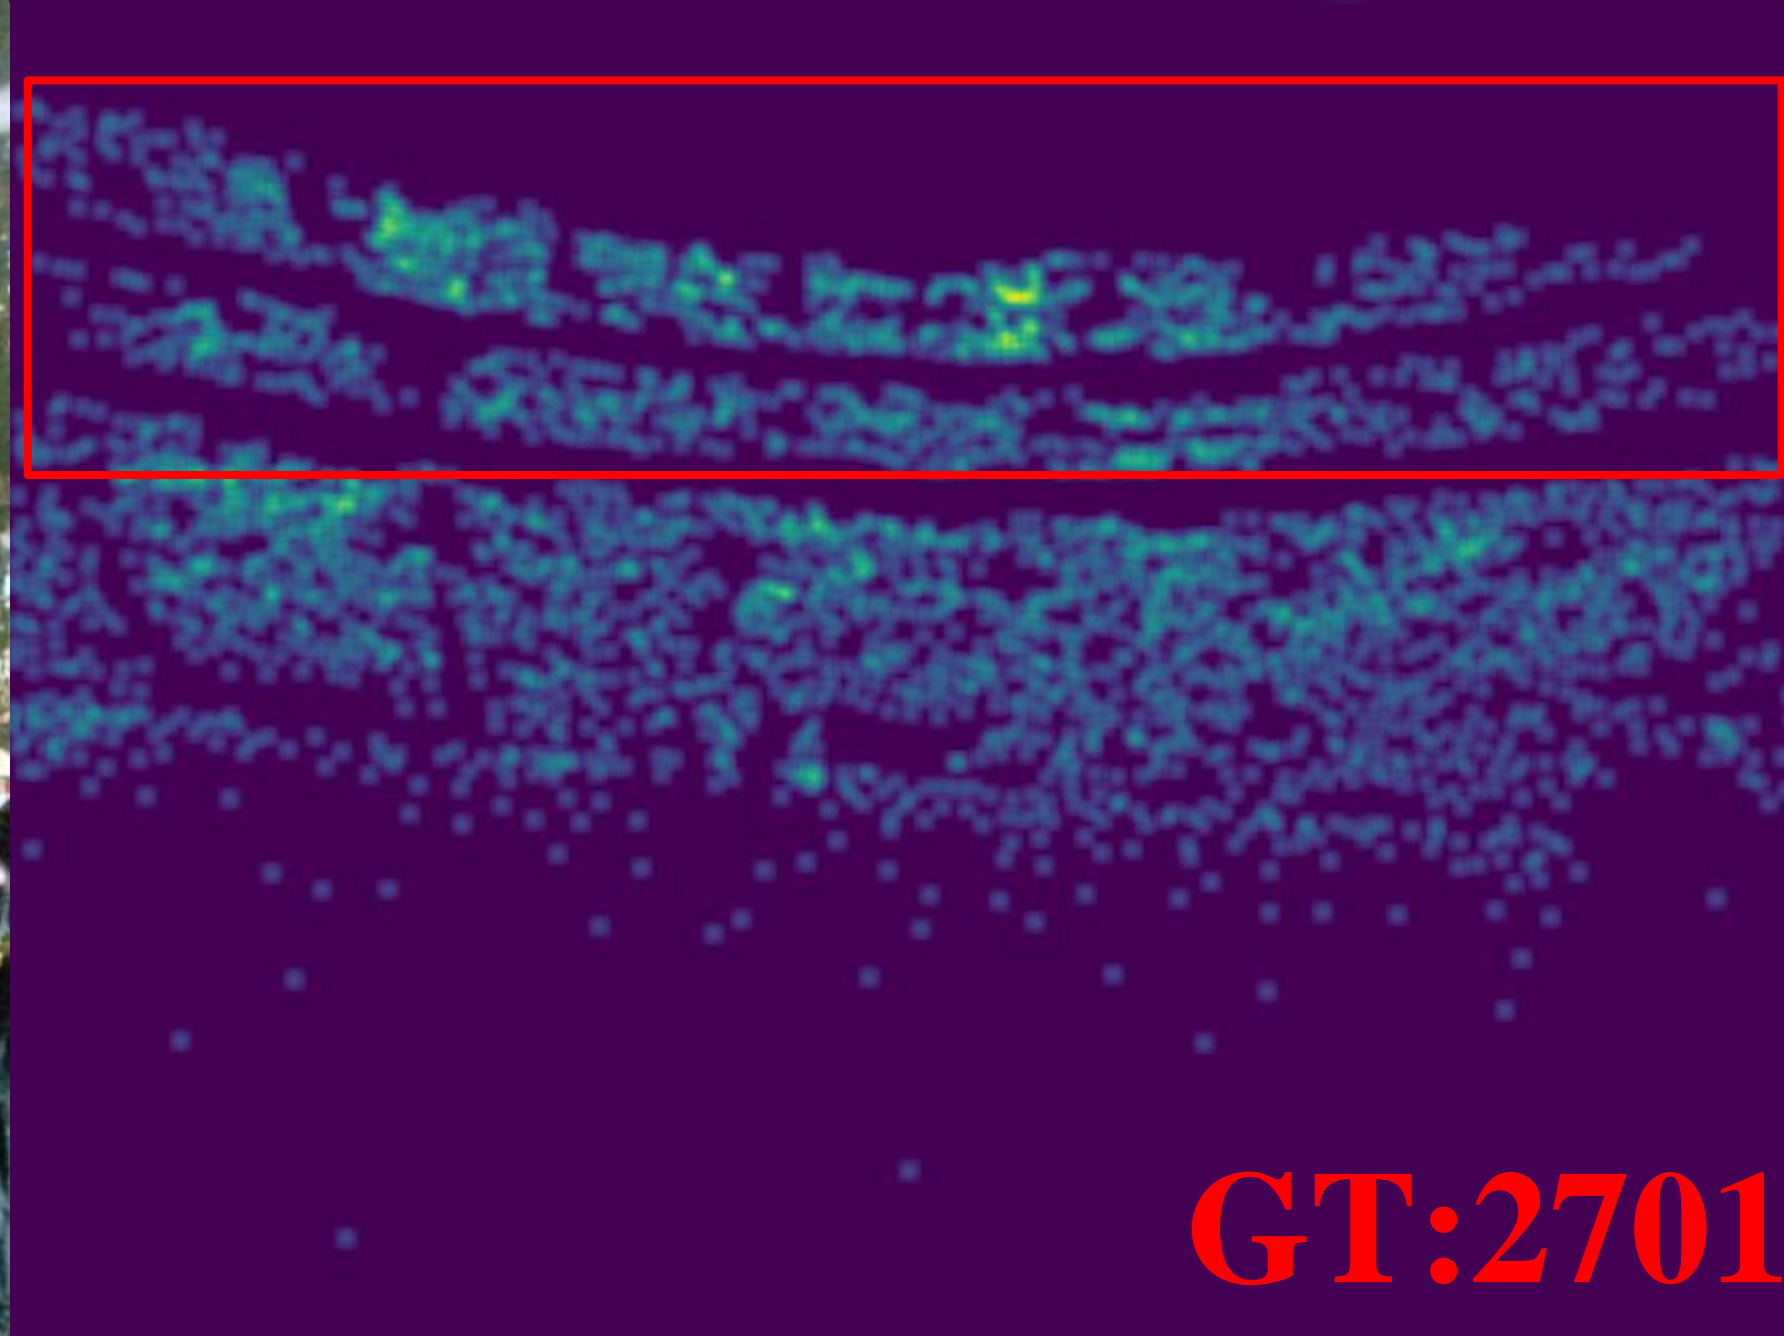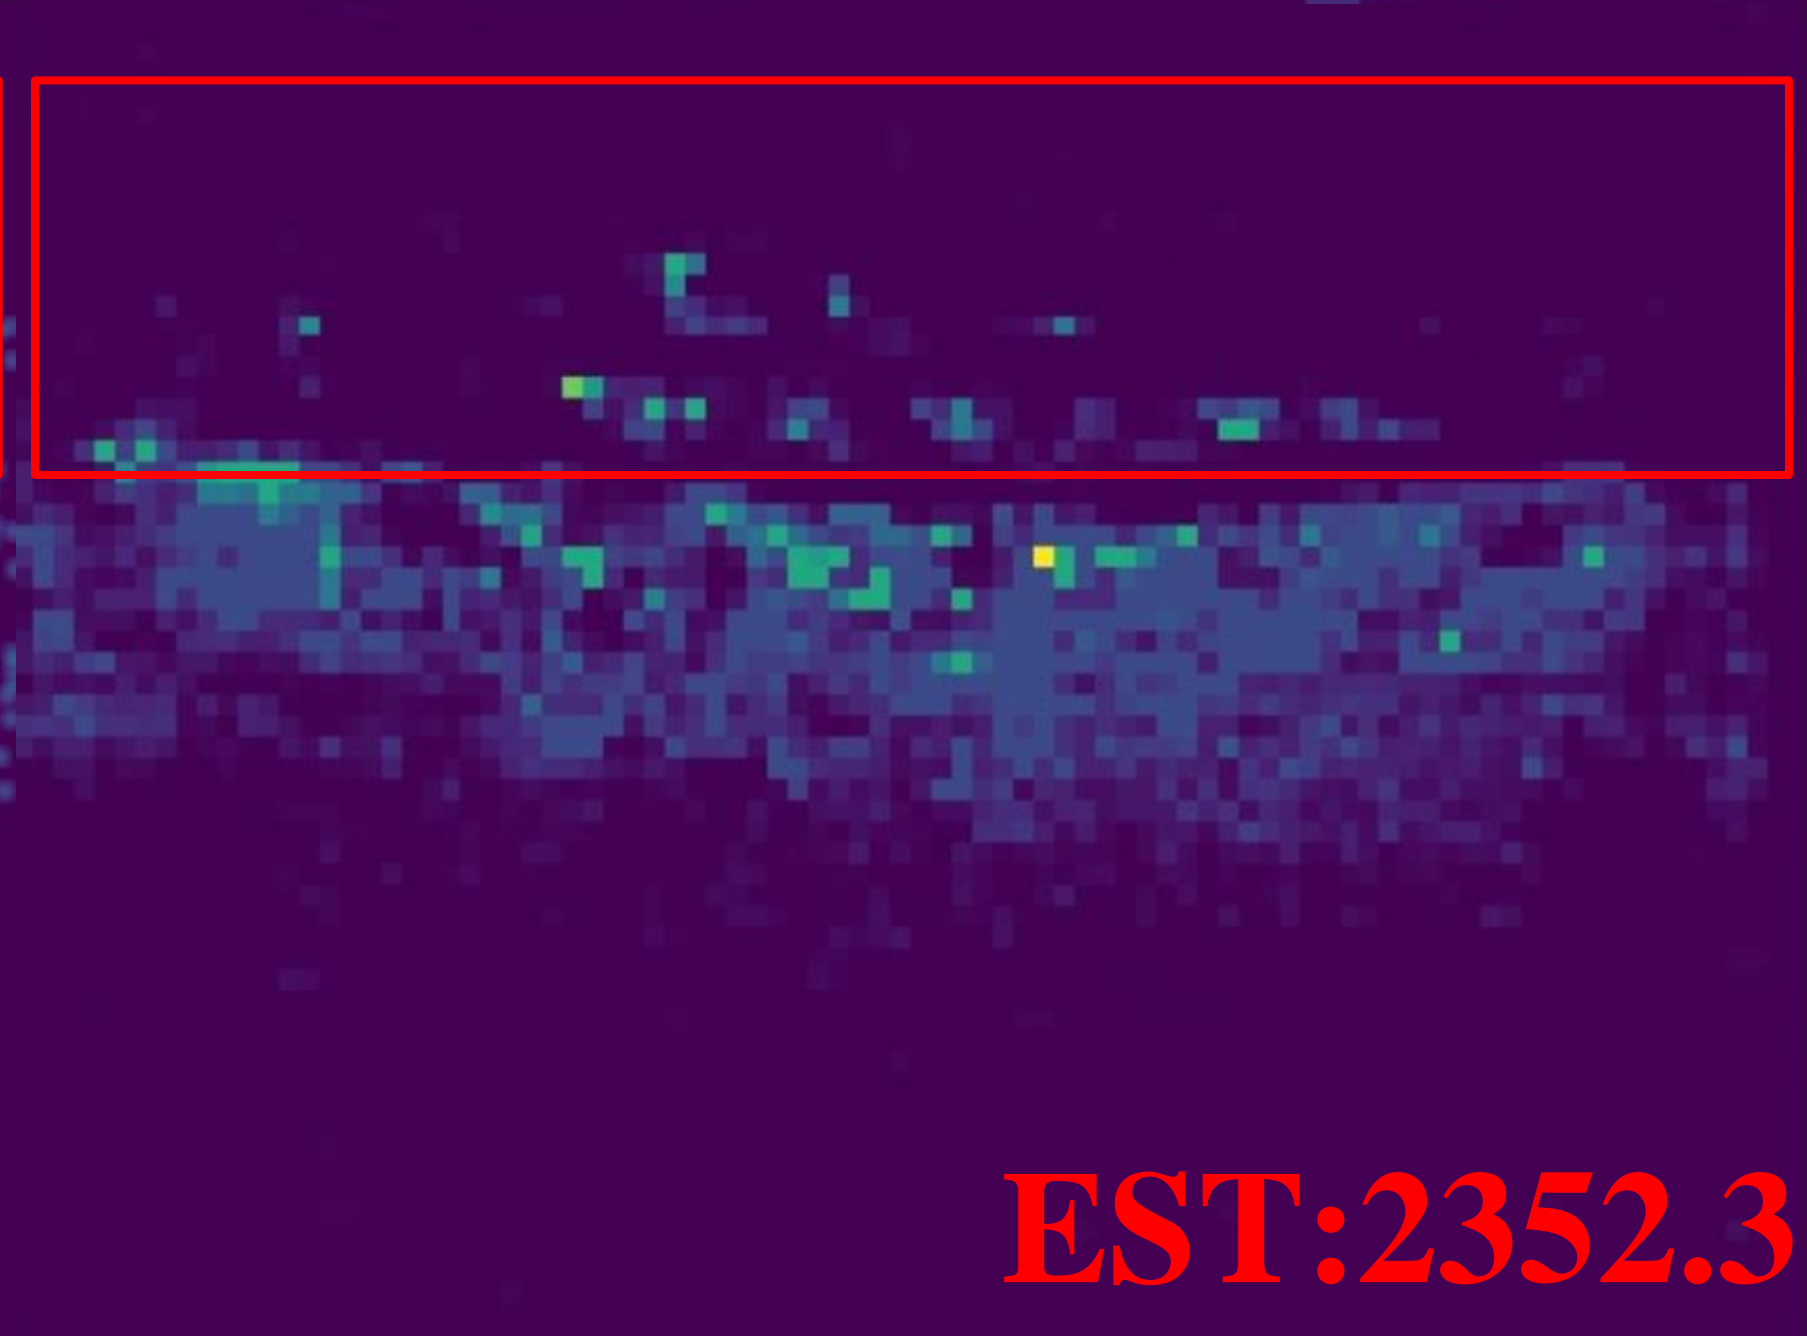

GT:2701

EST:2352.3

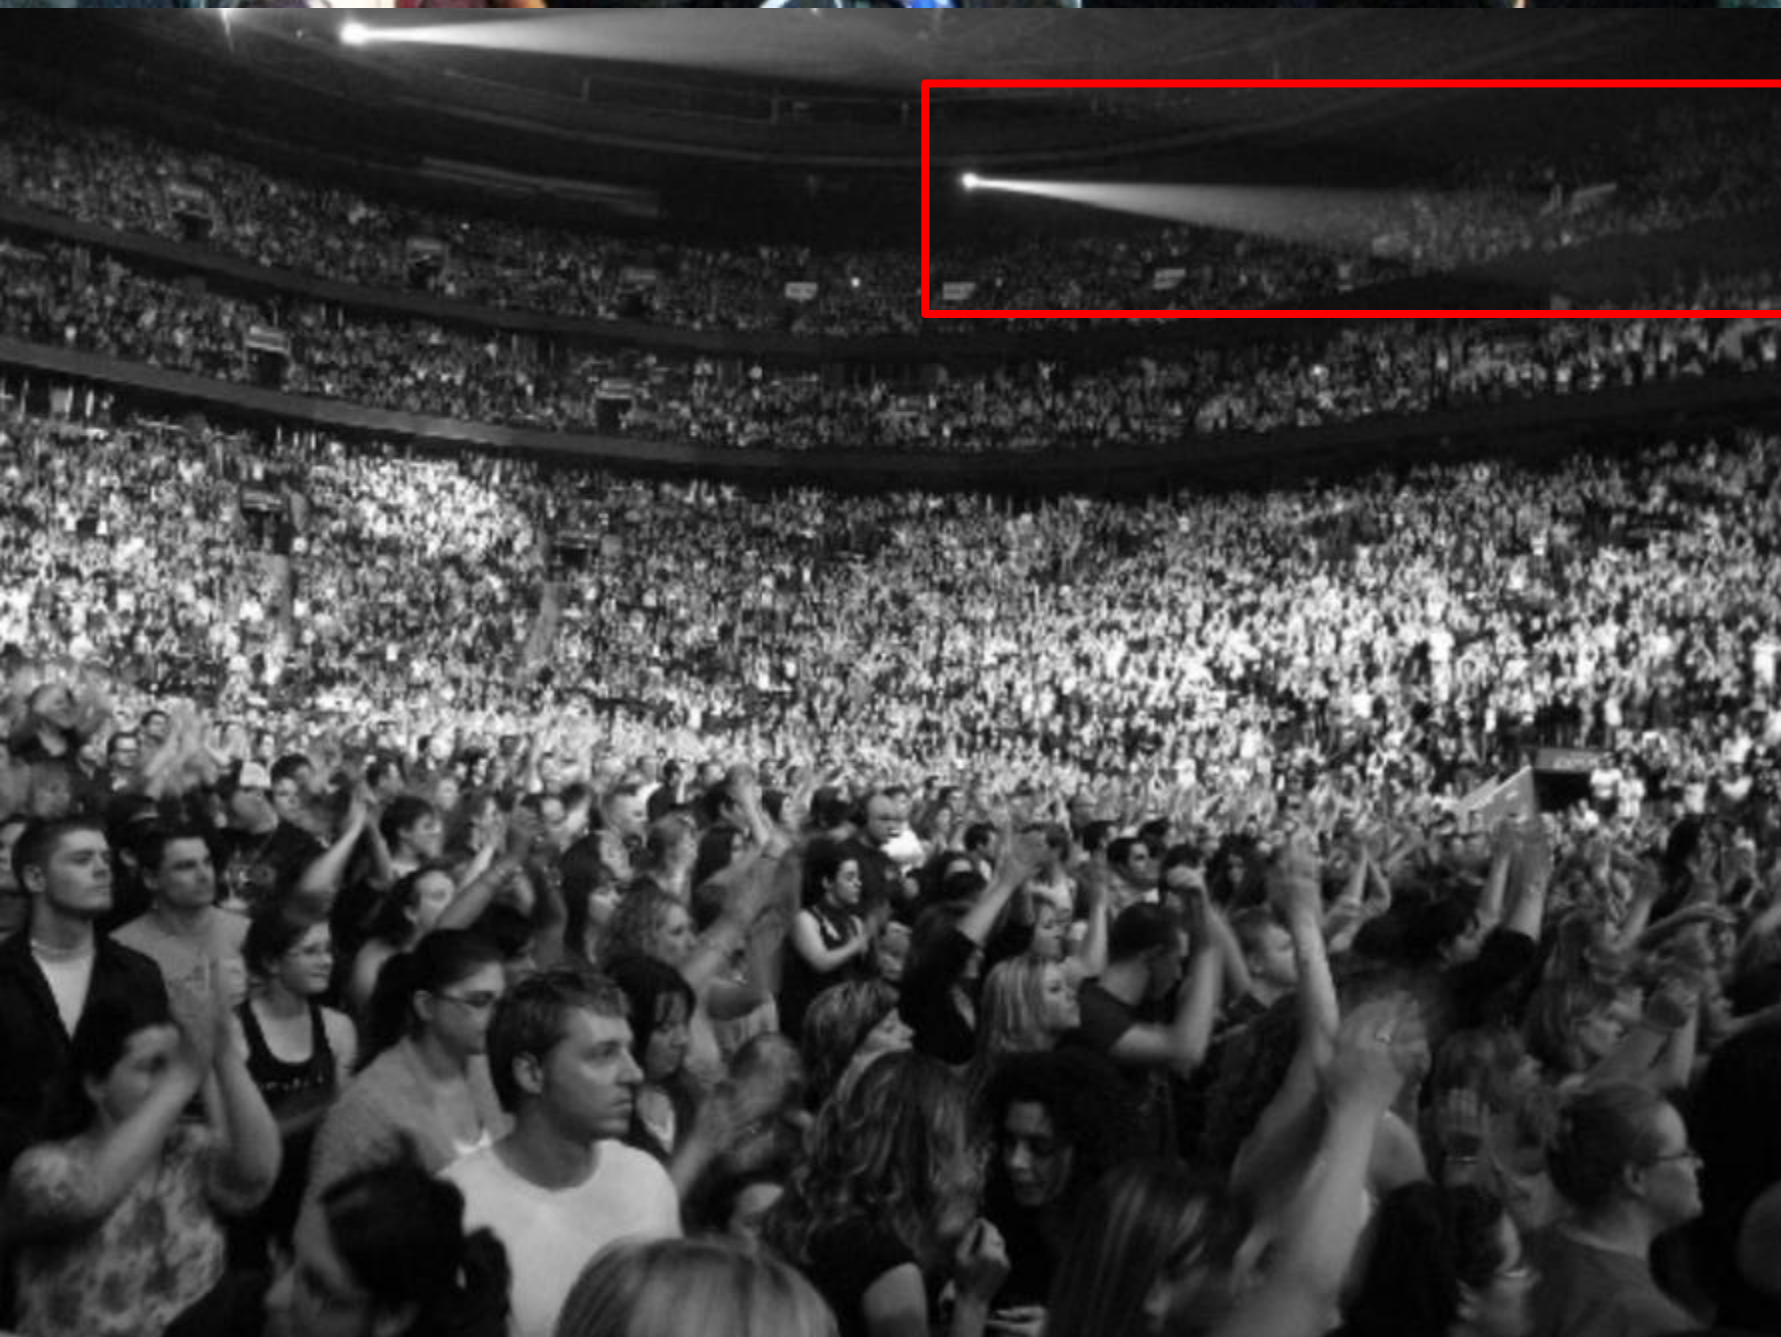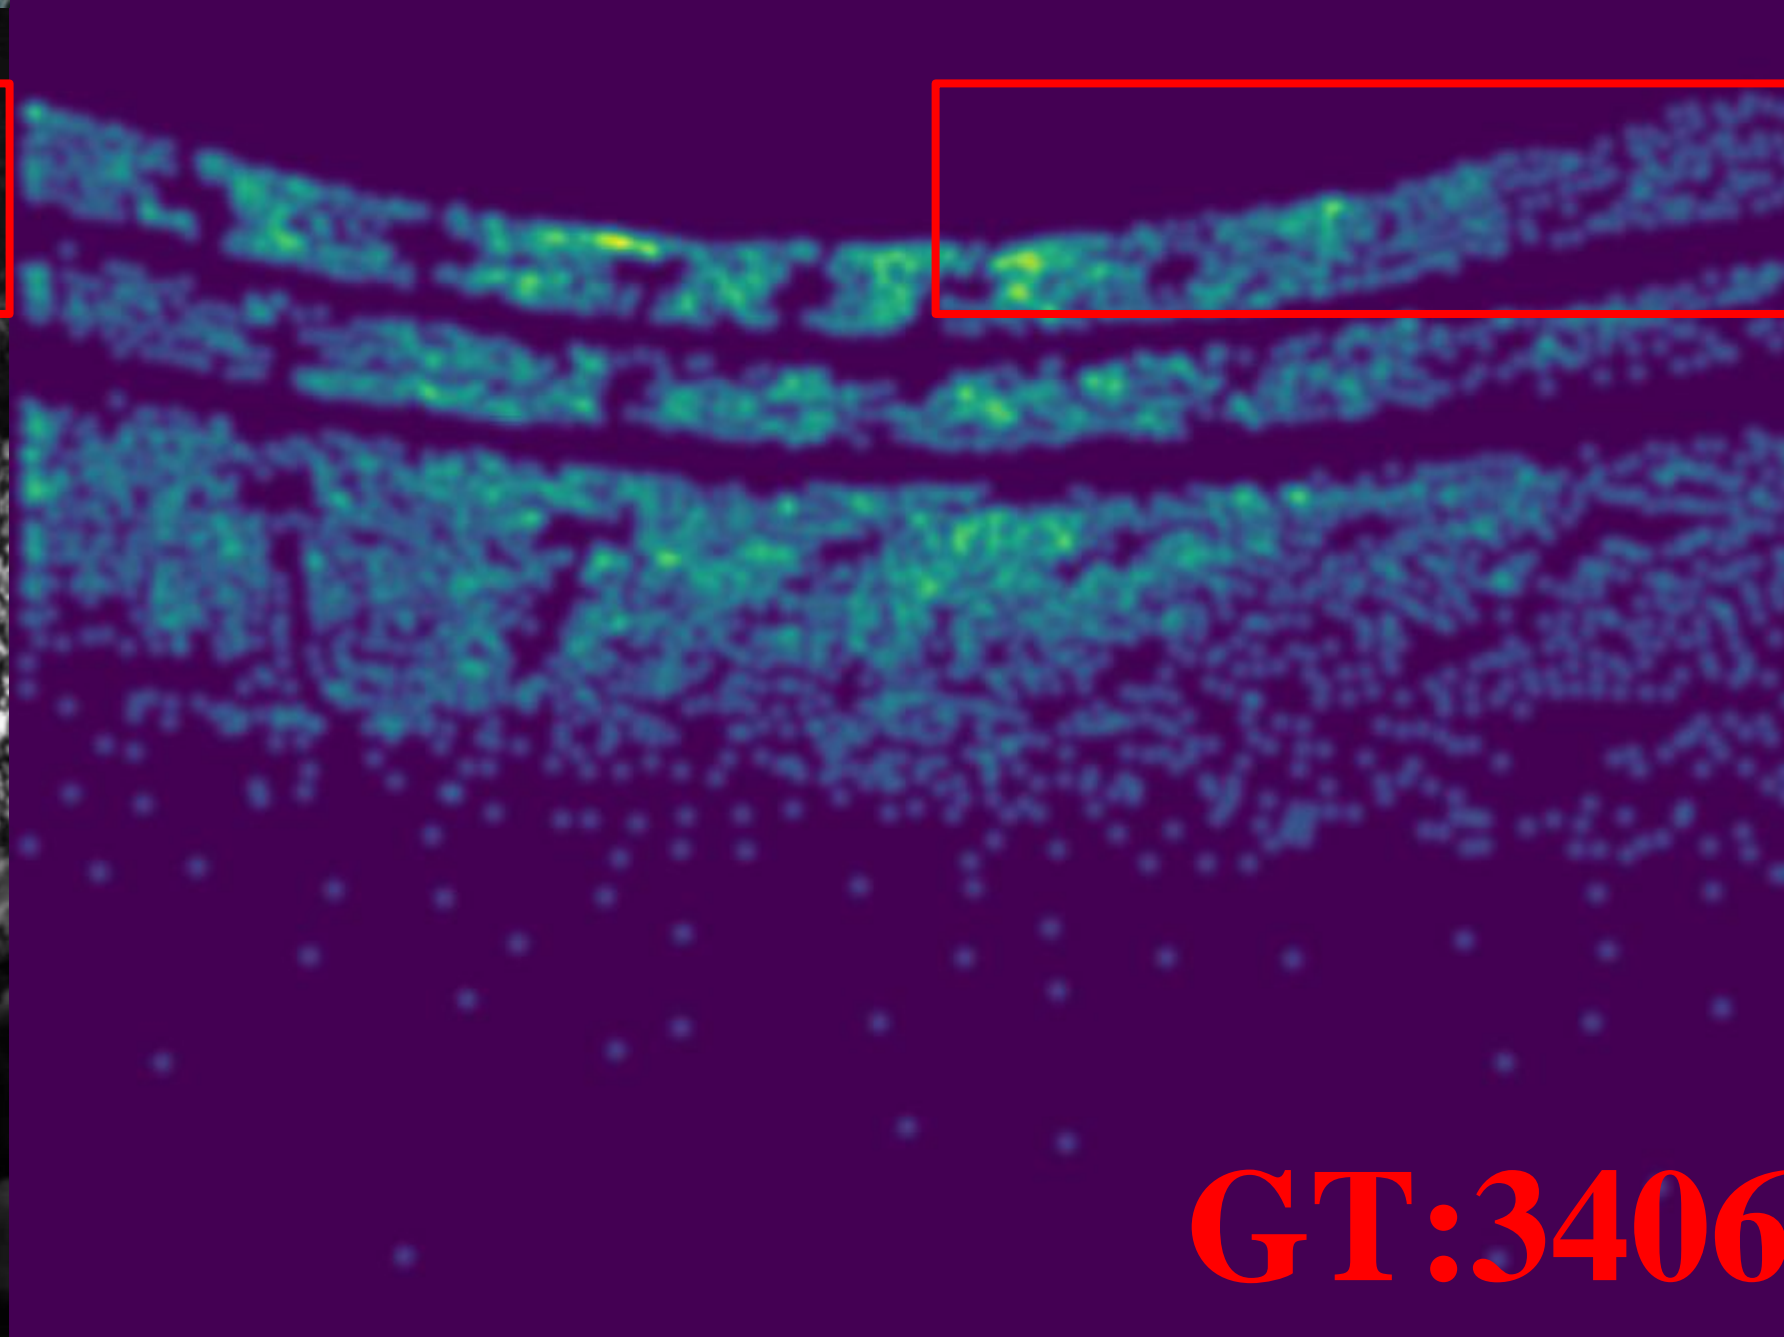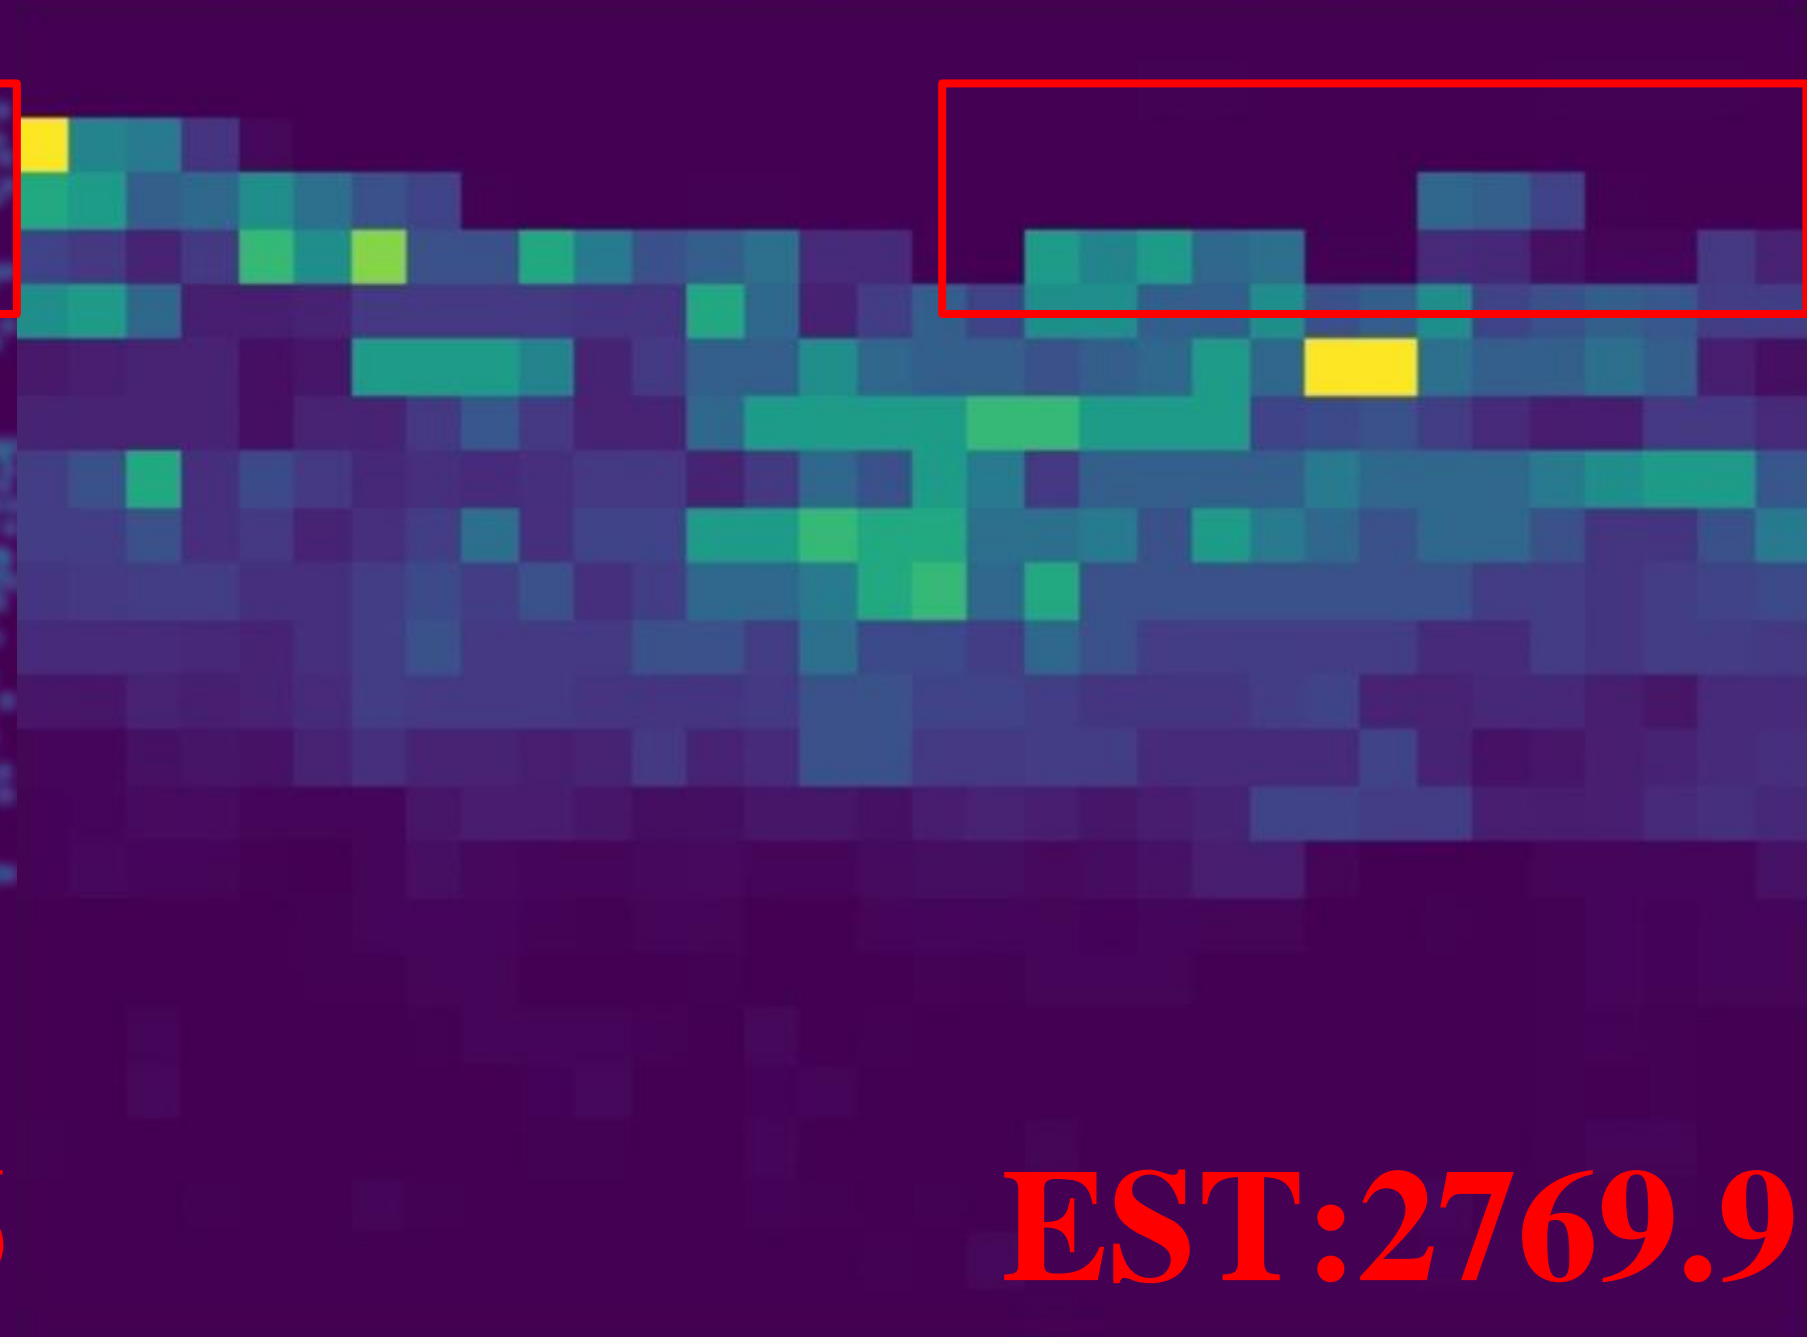

GT:3406

EST:2769.9

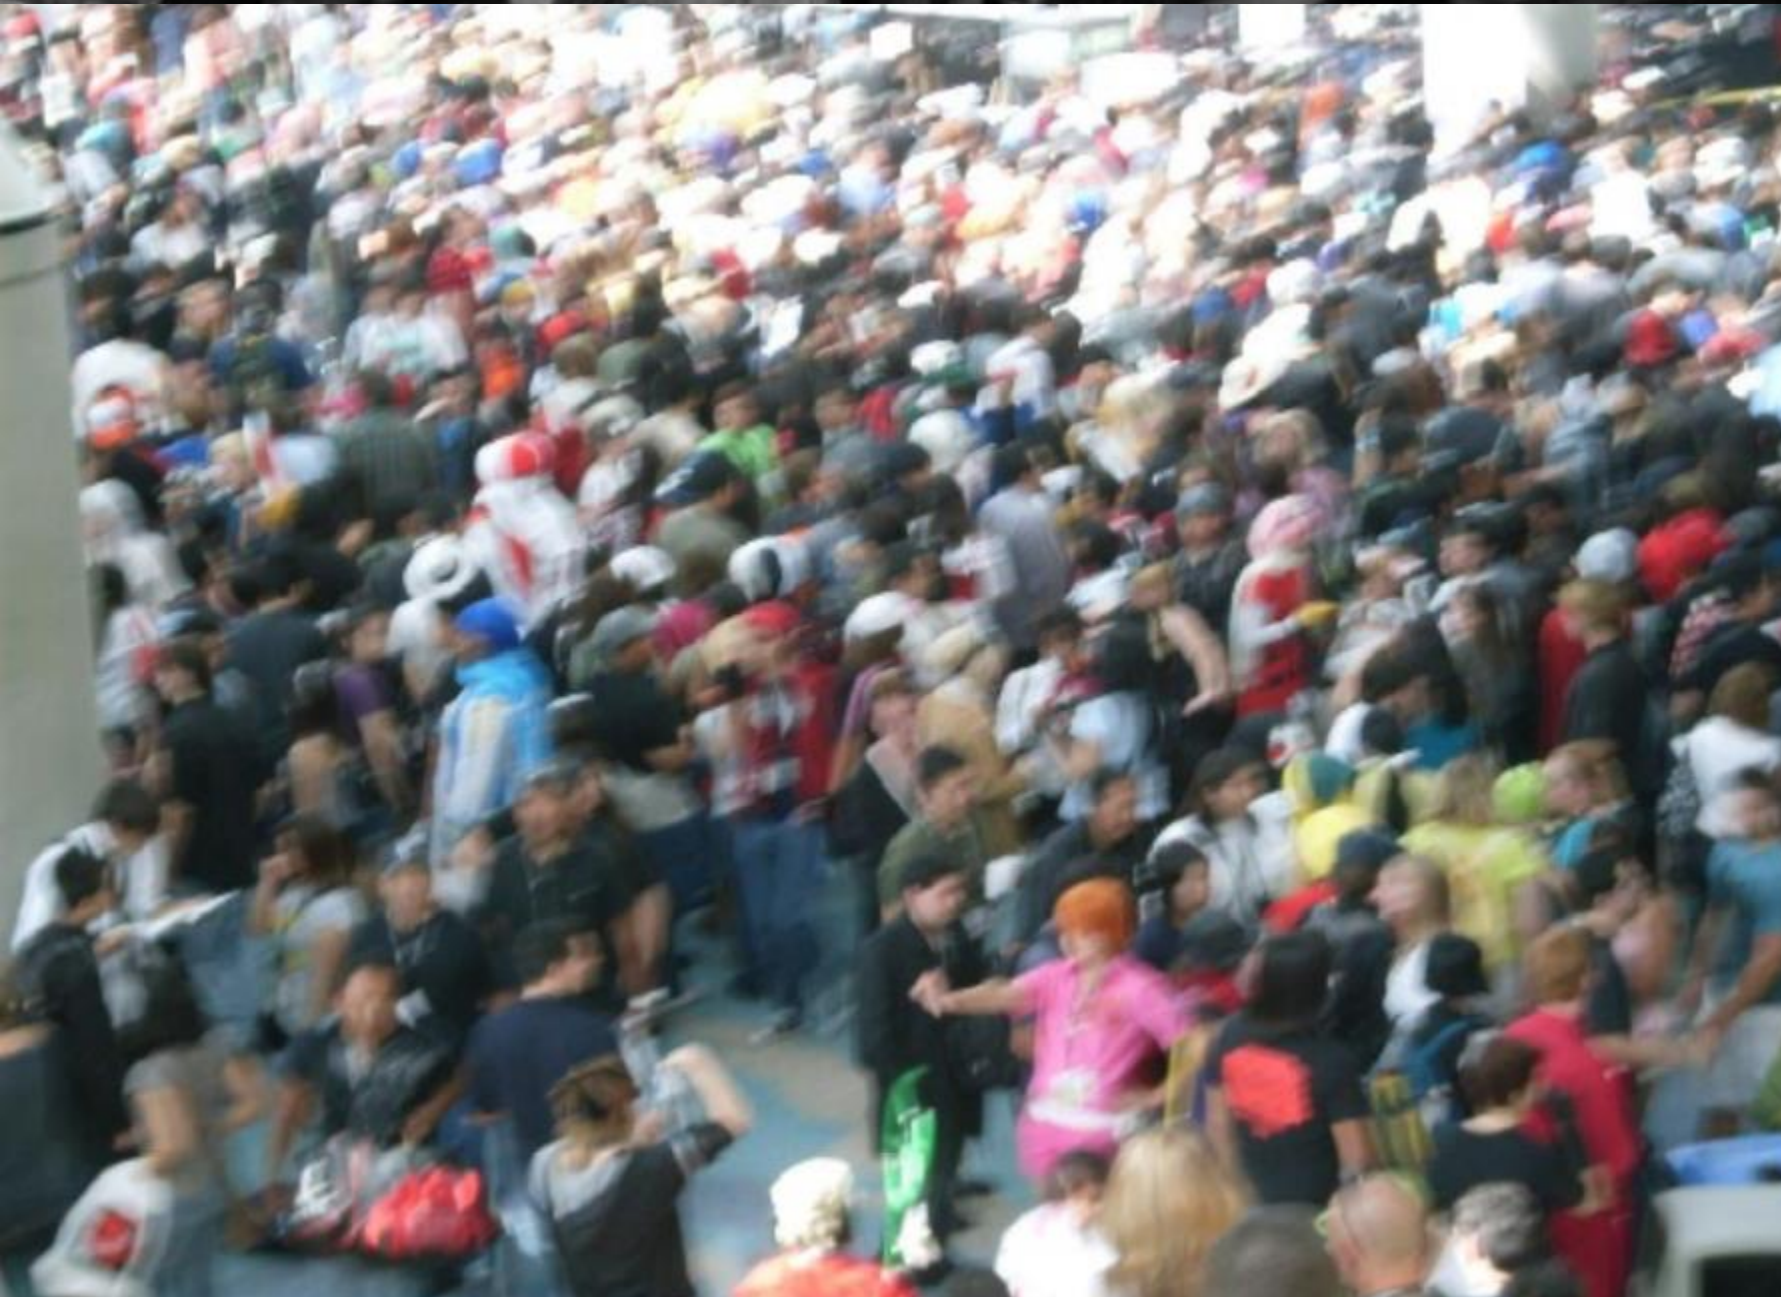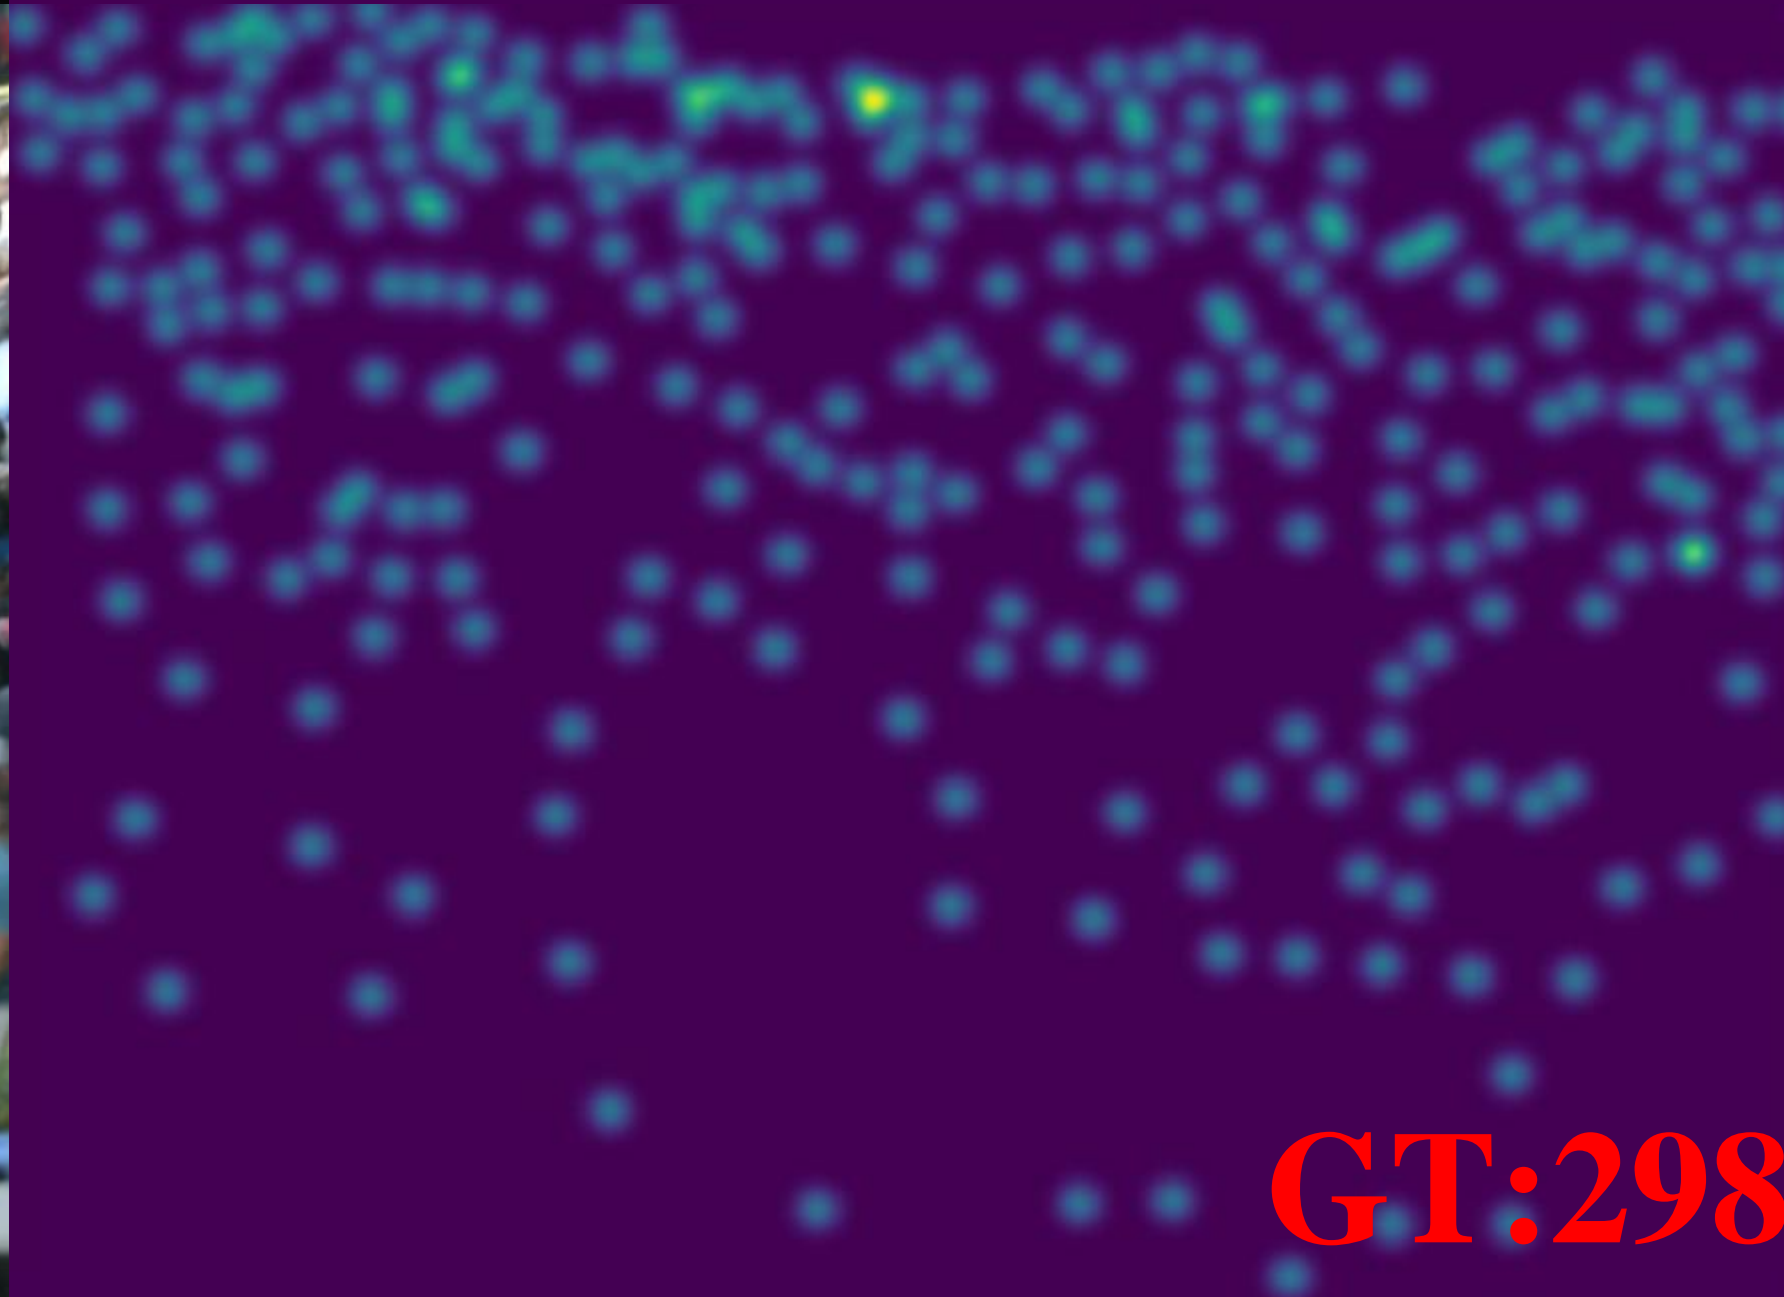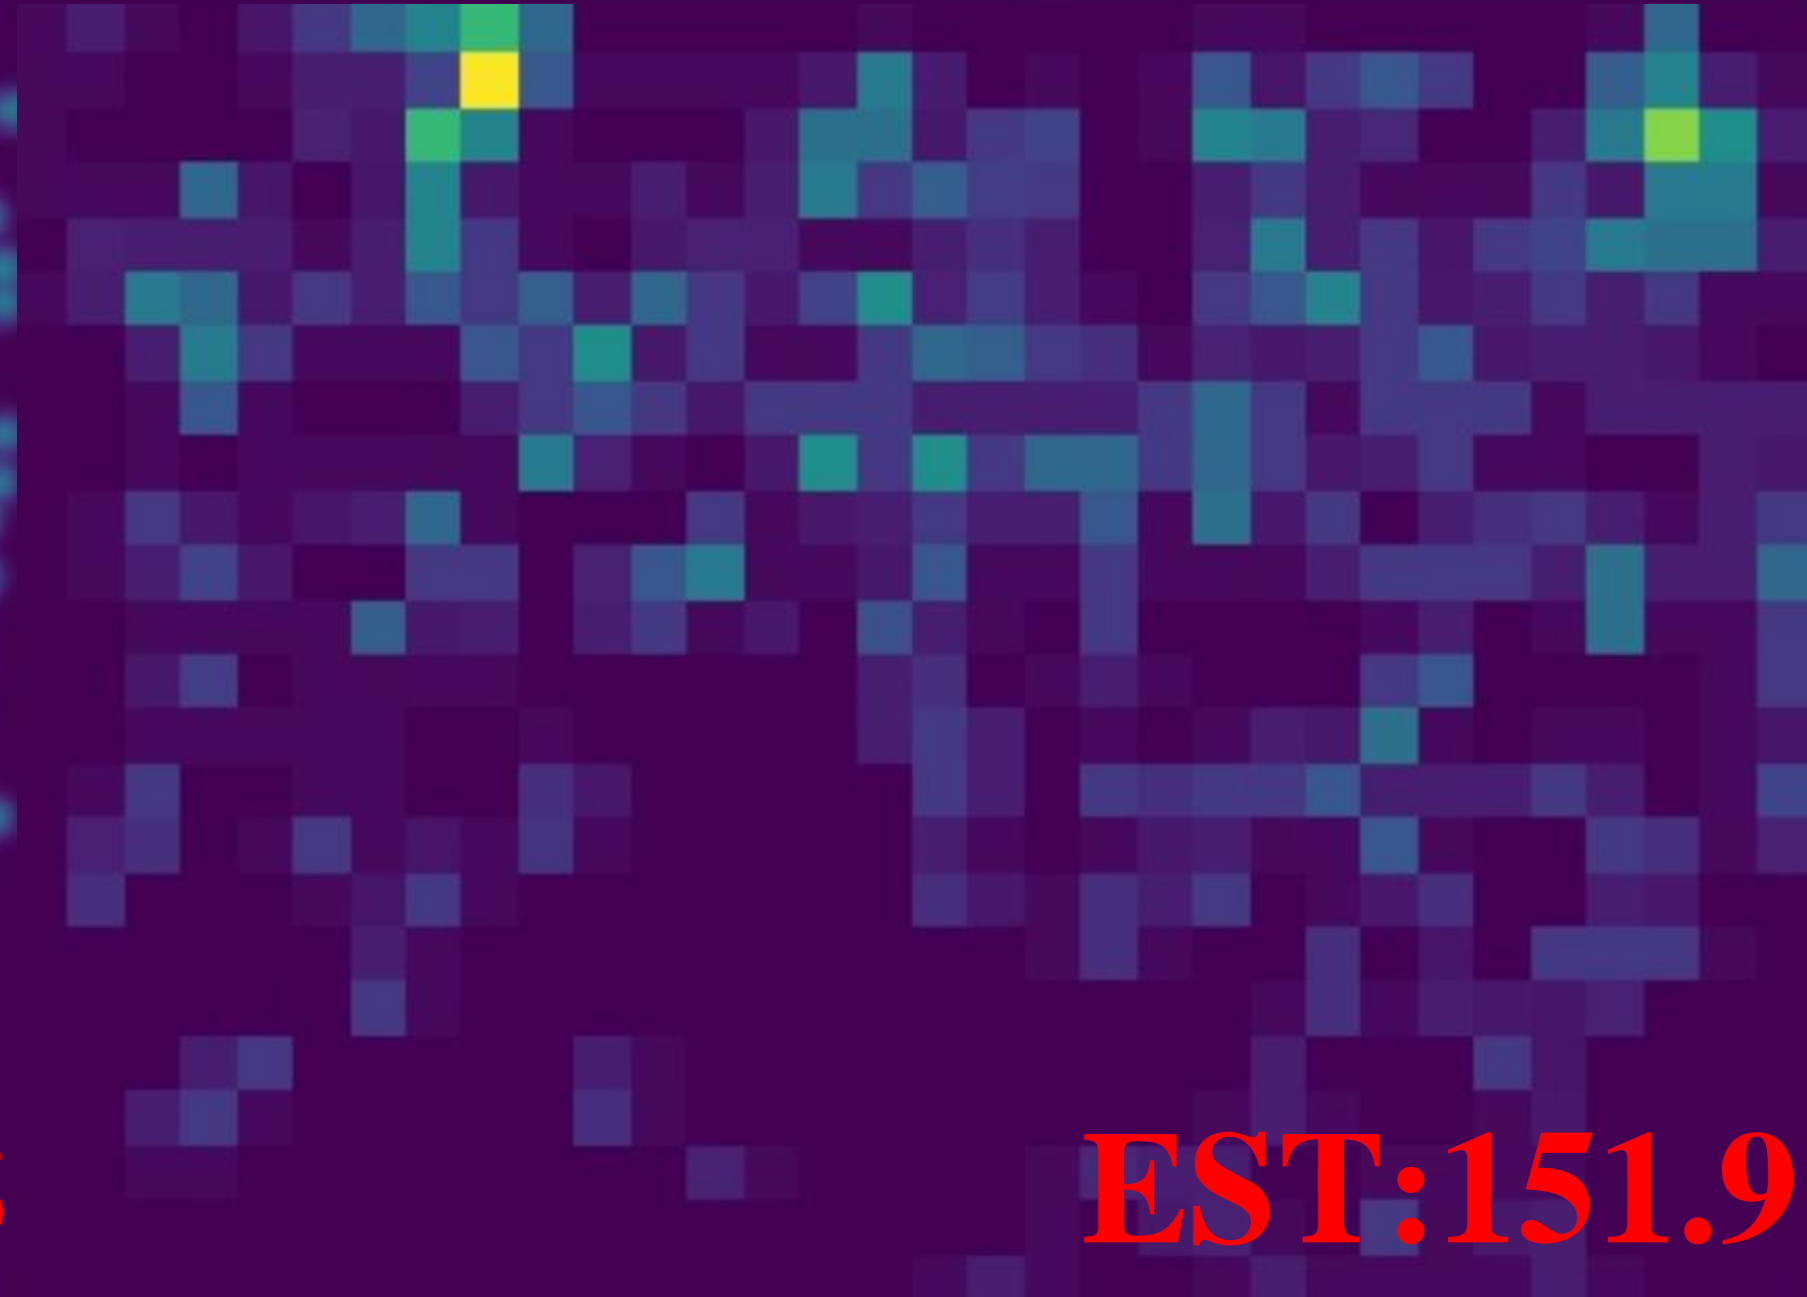

GT:298

EST:151.9

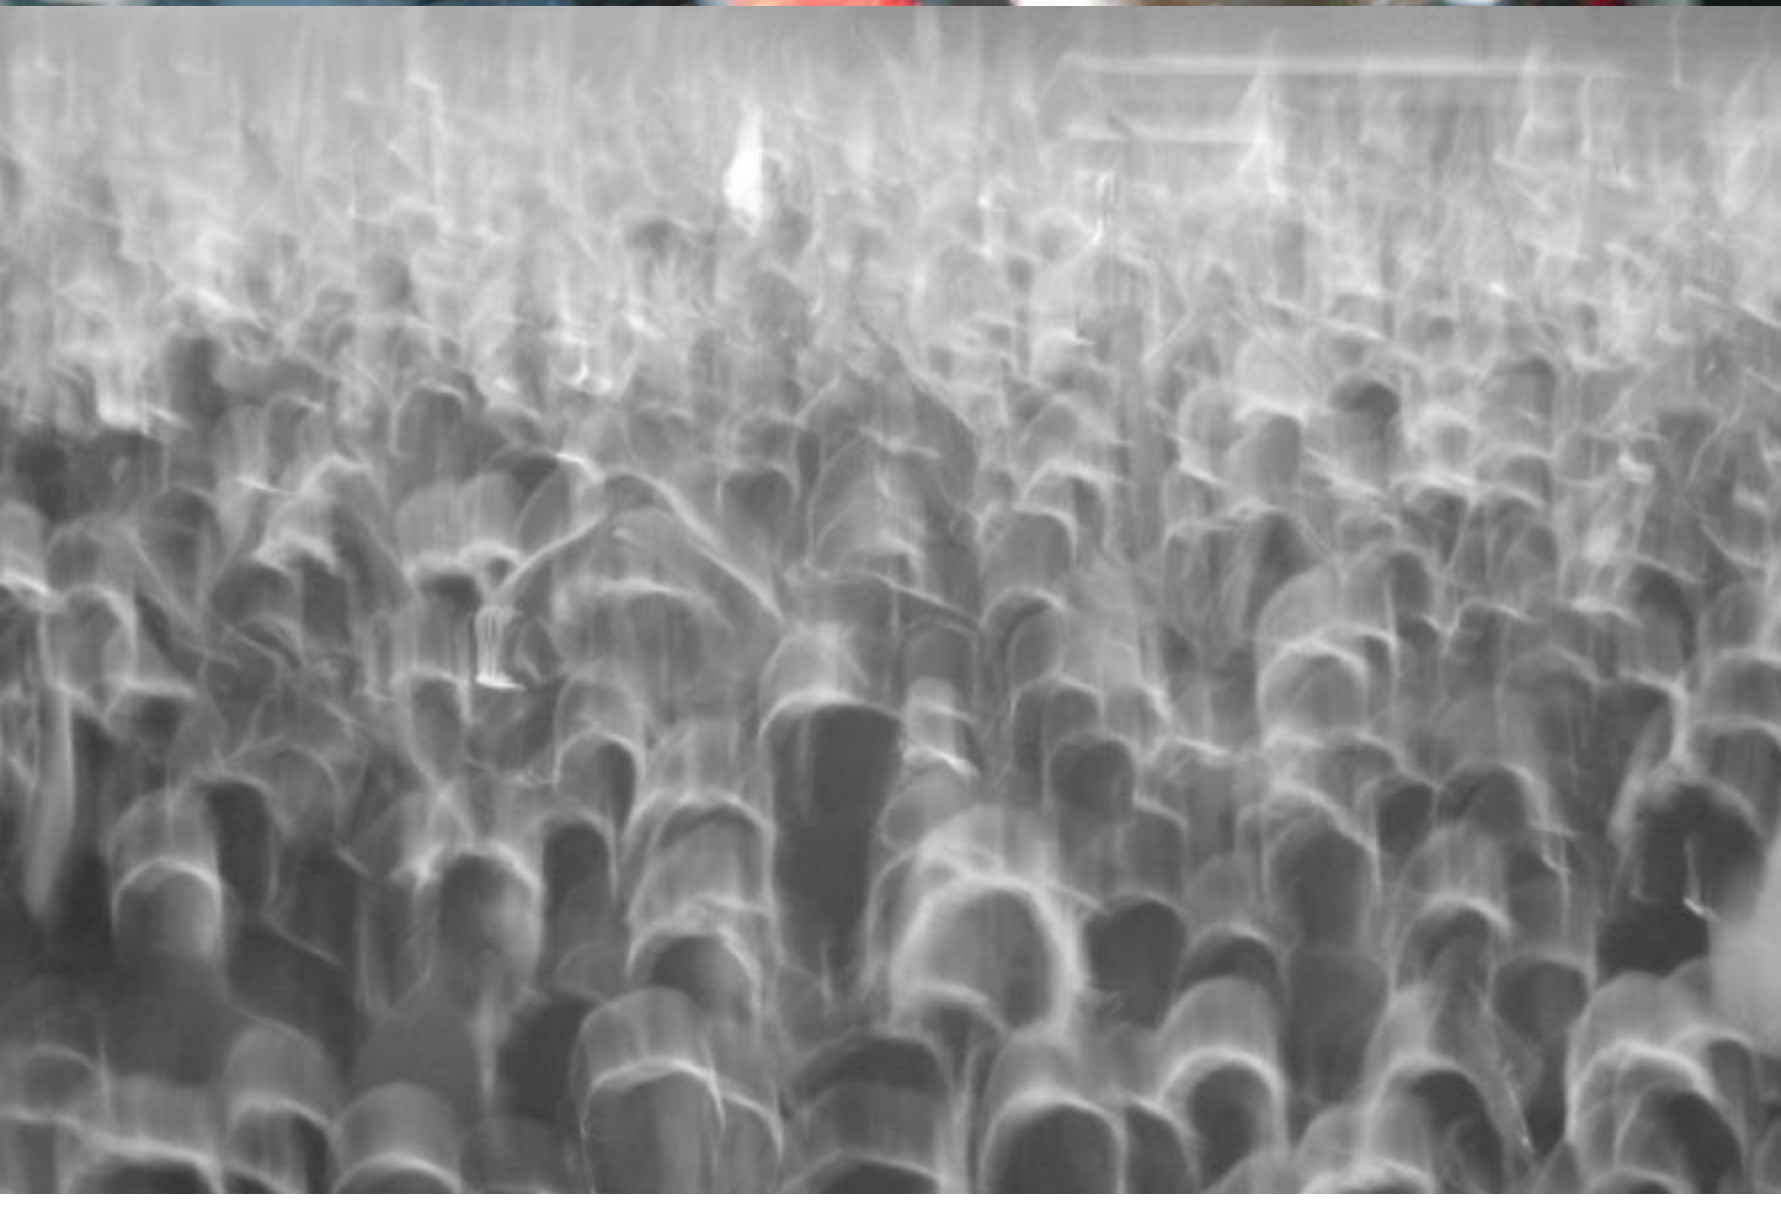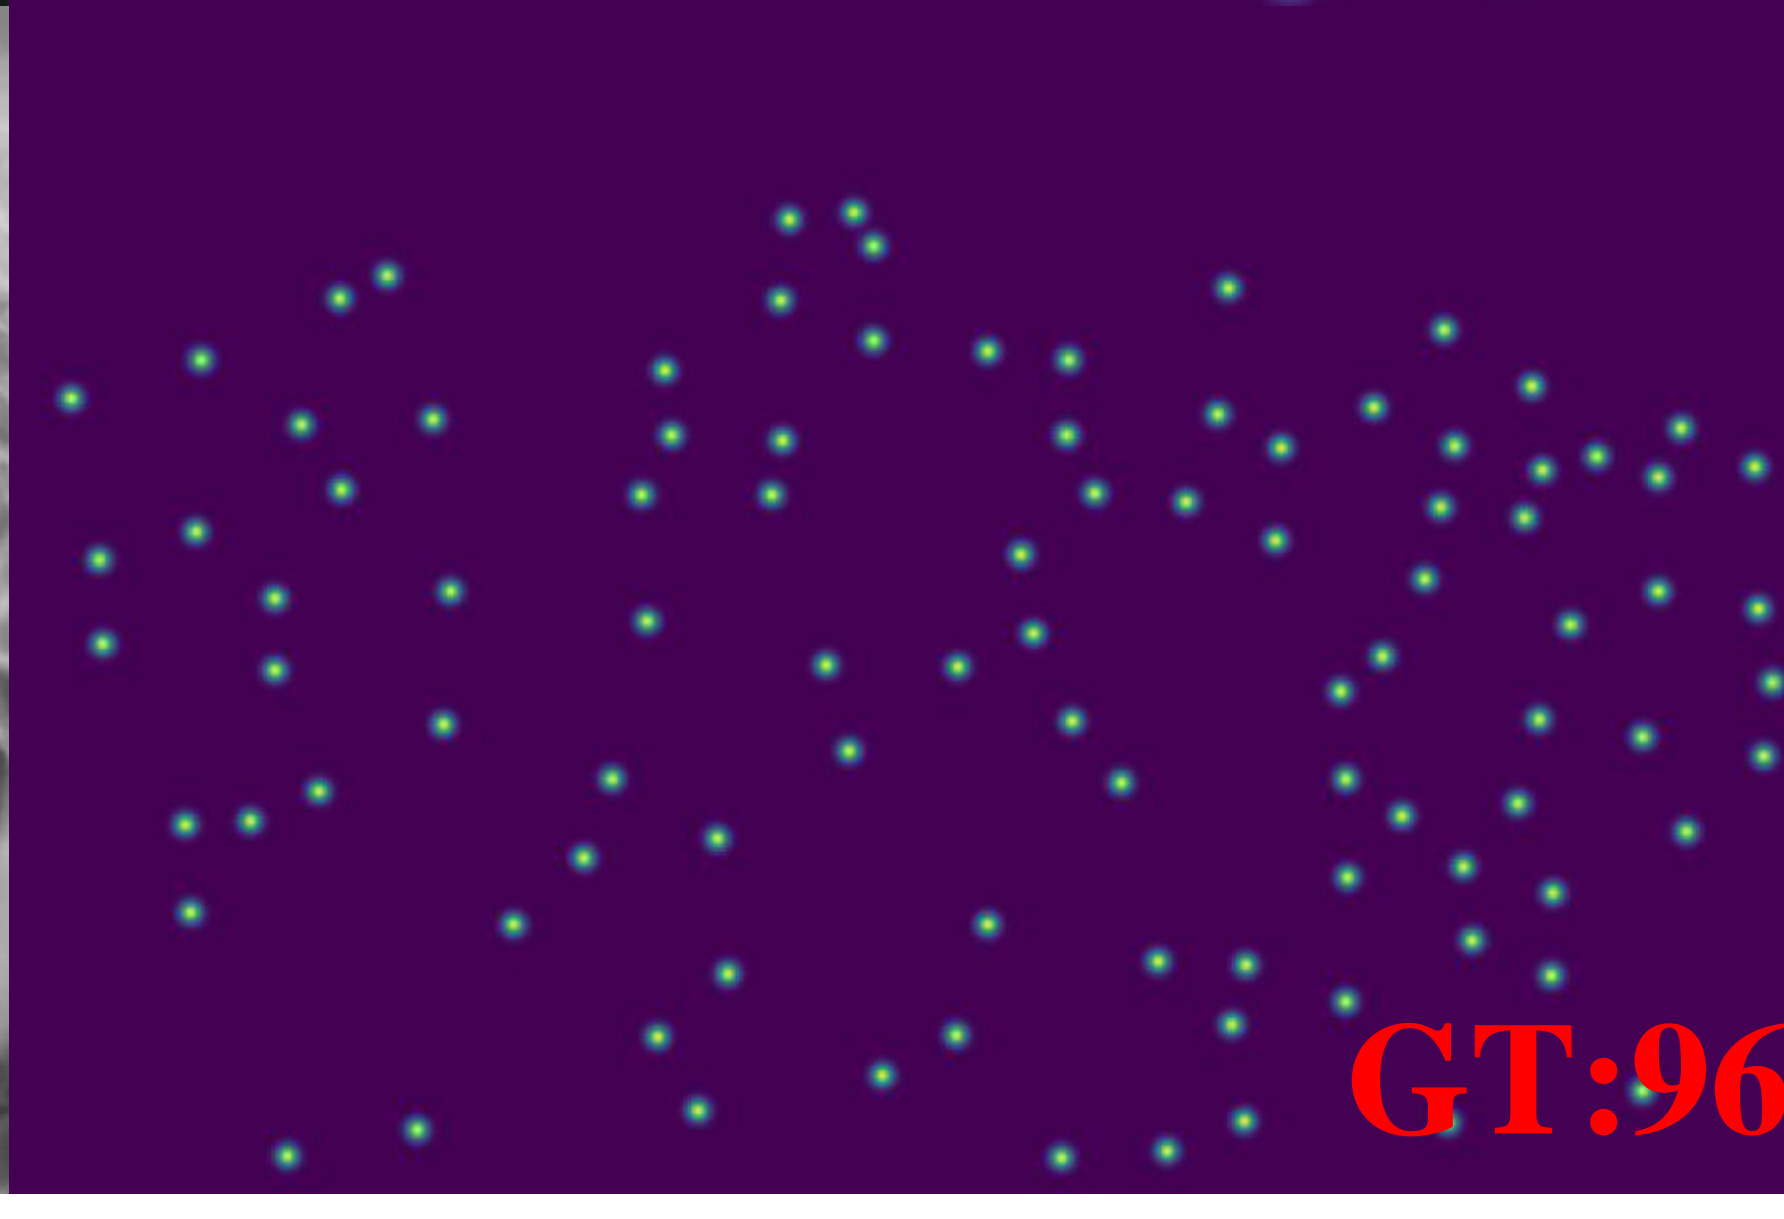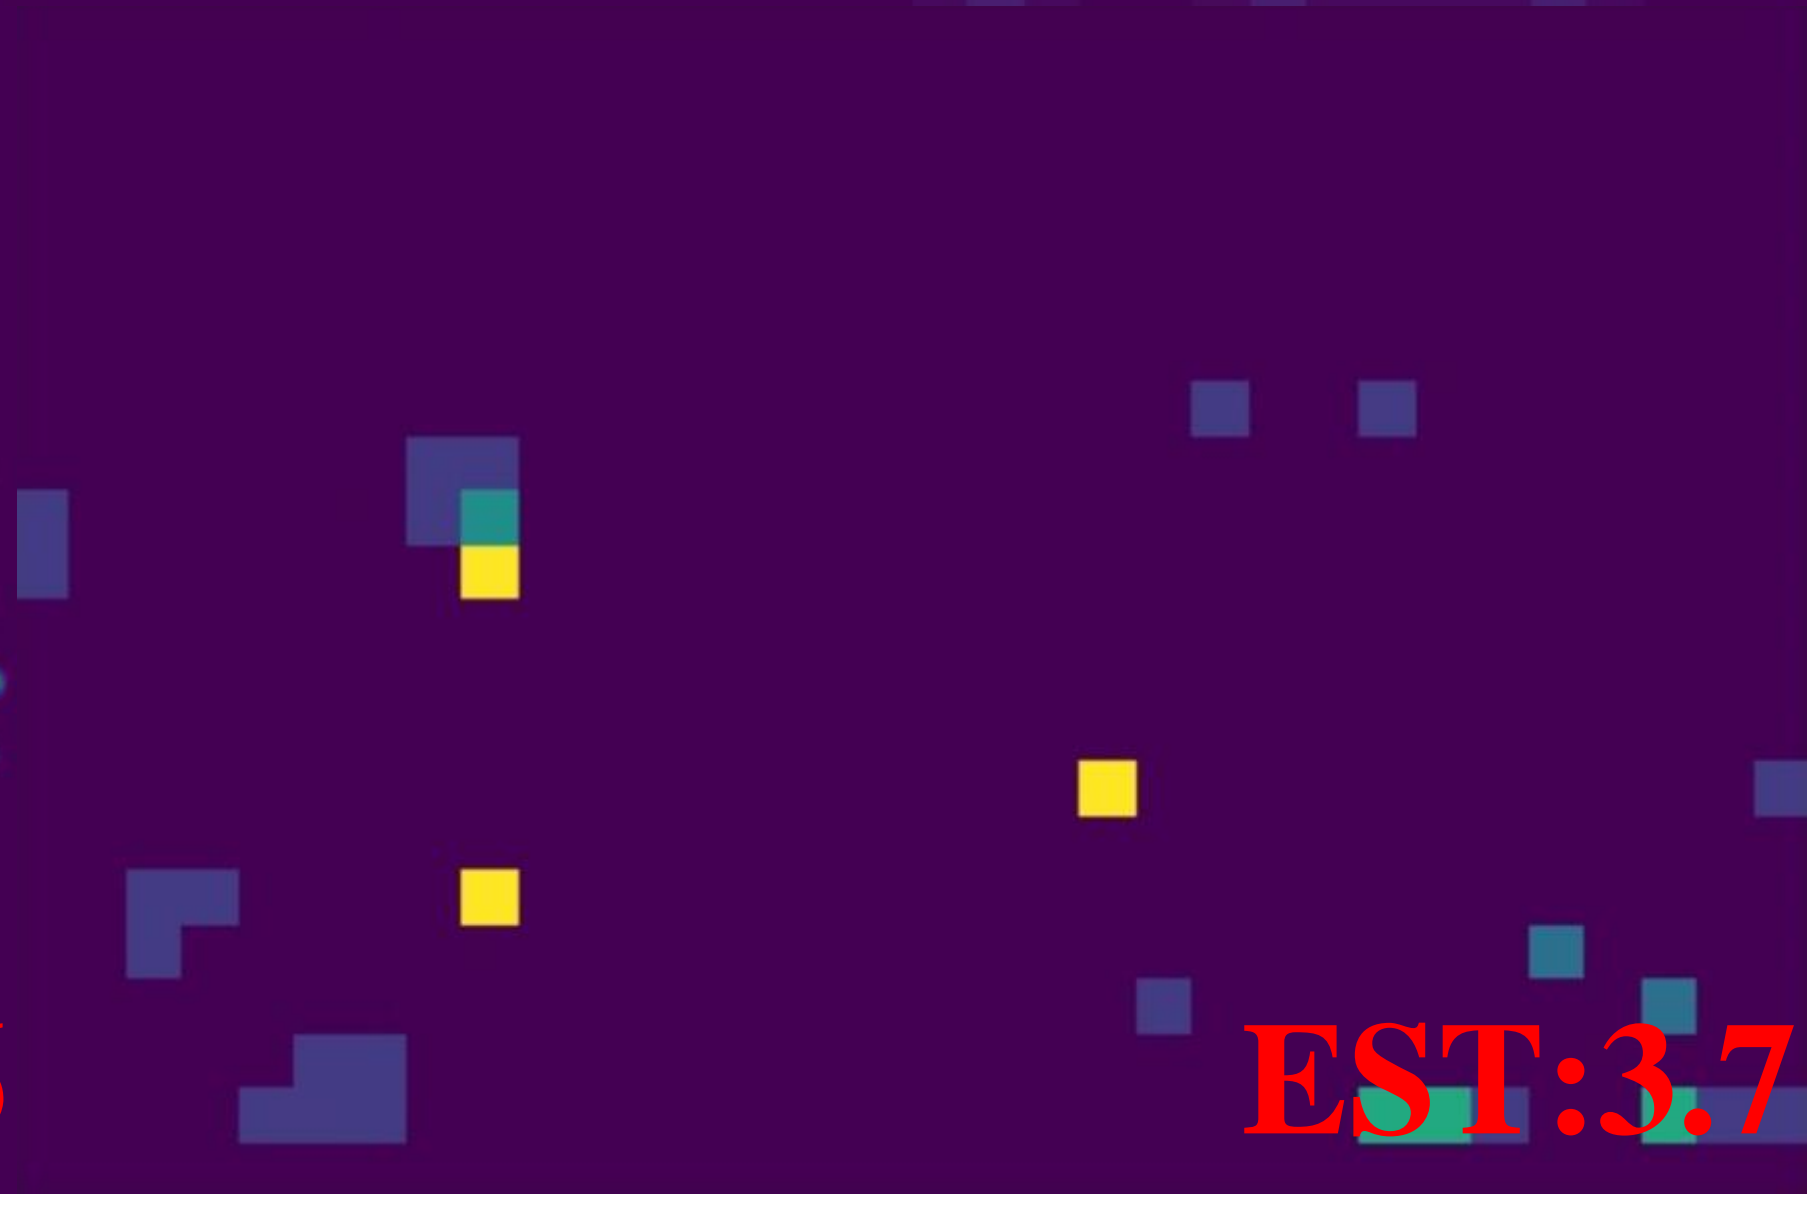

GT:96

EST:3.7

Supplement: Supplementary file 6 [file 123550171-supp.zip]
